# Supplementary material for: Construction of an isoquinolinone framework from carboxylic-ester-directed umpolung ring opening of methylenecyclopropanes
Source: Royal Society of Chemistry journal article supplement (doi:10.1039/d1cc04826k), 2021-01-01
Supplement: d1cc04826k2.pdf [file d1cc04826k2.pdf]

## Supporting Information

### Construction of isoquinolinone framework from carboxylic ester directed umpolung ring opening of methylenecyclopropanes

*Hao-Zhao Wei,<sup>a</sup> Yin Wei,<sup>b\*</sup> and Min Shi<sup>a,b\*</sup>*

<sup>a</sup>Key Laboratory for Advanced Materials and Institute of Fine Chemicals, School of Chemistry & Molecular Engineering, East China University of Science and Technology, 130 Meilong Road, Shanghai 200237, China.

<sup>b</sup>State Key Laboratory of Organometallic Chemistry, Center for Excellence in Molecular Synthesis, Shanghai Institute of Organic Chemistry, Chinese Academy of Sciences, 345 Ling-Ling Lu, Shanghai, 200032, China. [weiyin@sioc.ac.cn](mailto:weiyin@sioc.ac.cn), [mshi@mail.sioc.ac.cn](mailto:mshi@mail.sioc.ac.cn). Fax 86-21-64166128

#### Content

|                                                            |     |
|------------------------------------------------------------|-----|
| <b>1. General remarks</b> .....                            | S2  |
| <b>2. Optimization of reaction conditions</b> .....        | S3  |
| <b>3. Procedures for preparation of reactants</b> .....    | S4  |
| <b>4. General procedure of cyclization reactions</b> ..... | S7  |
| <b>5. Characterization and spectra charts</b> .....        | S10 |
| <b>6. X-ray data</b> .....                                 | S86 |

---

## 1. General remarks

$^1\text{H}$  NMR spectra were recorded on Agilent-400, Varian Mercury-400 and Bruker-400 spectrometer for solution in  $\text{CDCl}_3$  with tetramethylsilane (TMS) as an internal standard; coupling constants  $J$  are given in Hz.  $^{13}\text{C}$  NMR spectra were recorded on Agilent-400, Varian Mercury-400 and Bruker-400 spectrophotometers with complete proton decoupling spectrophotometers ( $\text{CDCl}_3$ : 77.0 ppm). The reference of  $^{19}\text{F}$  NMR (376 MHz) spectra is trichlorofluoromethane ( $\delta$  ppm 0). Mass and HRMS spectra were recorded by ESI, EI or FI method. Organic solvents used were dried by standard methods when necessary. Infrared spectra were recorded on a Perkin-Elmer PE-983 spectrometer with absorption in  $\text{cm}^{-1}$ . Melting points were determined on a digital melting point apparatus and temperatures were uncorrected. Commercially obtained reagents were used without further purification. All these reactions were monitored by TLC with silica gel coated plates. Flash column chromatography was carried out using silica gel at increased pressure.

## 2. Optimization of reaction conditions

**Table S1** Optimization of reaction conditions

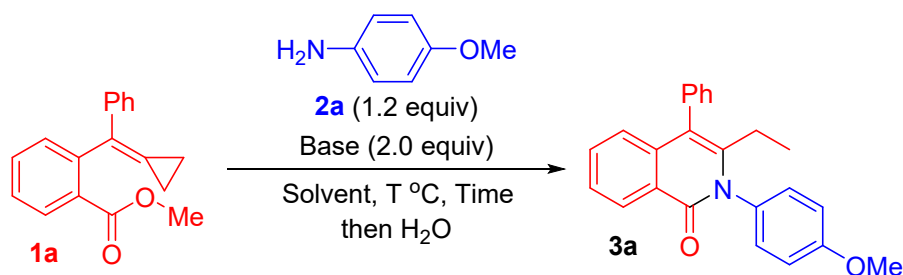

| Entry    | Base                           | Solvent <sup>a</sup> | T [°C]        | Time         | Yield/ <b>3a</b> [%] <sup>b</sup> |
|----------|--------------------------------|----------------------|---------------|--------------|-----------------------------------|
| 1        | LiHMDS                         | Toluene              | rt            | 24 h         | 54                                |
| 2        | LiHMDS                         | Toluene              | 0 - rt        | 10 h         | 98                                |
| 3        | LiHMDS                         | Toluene              | 0 - 50        | 1.5 h        | 86                                |
| <b>4</b> | <b>KHMDS</b>                   | <b>Toluene</b>       | <b>0 - 50</b> | <b>1.5 h</b> | <b>96</b>                         |
| 5        | LDA                            | Toluene              | 0 - 50        | 1.5 h        | 14                                |
| 6        | <sup>t</sup> BuOK              | Toluene              | 0 - 50        | 1.5 h        | 0                                 |
| 7        | DBU                            | Toluene              | 0 - 50        | 1.5 h        | 0                                 |
| 8        | K <sub>2</sub> CO <sub>3</sub> | Toluene              | 0 - 50        | 1.5 h        | 0                                 |
| 9        | K <sub>3</sub> PO <sub>4</sub> | Toluene              | 0 - 50        | 1.5 h        | 0                                 |
| 10       | NaOH                           | Toluene              | 0 - 50        | 1.5 h        | 0                                 |
| 11       | KHMDS                          | MeCN                 | 0 - 50        | 1.5 h        | 0                                 |
| 12       | KHMDS                          | DCE                  | 0 - 50        | 1.5 h        | 0                                 |
| 13       | KHMDS                          | THF                  | 0 - 50        | 1.5 h        | 94                                |
| 14       | KHMDS                          | Toluene              | 0 - 50        | 1.5 h        | 95 <sup>c</sup>                   |

Reaction conditions: **1a** (0.2 mmol, 1.0 equiv), **2a** (0.24 mmol, 1.2 equiv), base (0.4 mmol, 2.0 equiv), solvent, T °C, time, quenched by water. <sup>a</sup> Except DBU, K<sub>2</sub>CO<sub>3</sub>, K<sub>3</sub>PO<sub>4</sub> and NaOH, bases were dissolved in THF, thus solvents are mixed solvents in these entries in fact. <sup>b</sup> <sup>1</sup>H NMR yield using 1,3,5-trimethoxybenzene as an internal standard. <sup>c</sup> Isolated yield.

### 3. Procedures for preparation of reactants

#### General procedure for preparation of methyl esters tethered MCP groups:

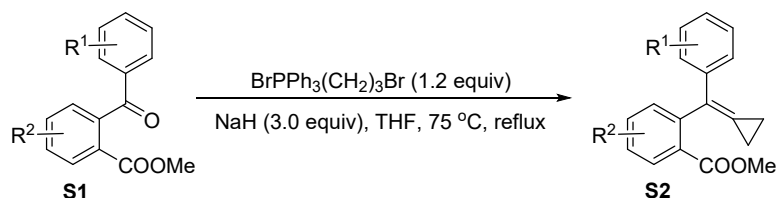

A solution of 3-bromopropyltriphenylphosphonium bromide (2.4 mmol, 1.2 equiv) and NaH (6.0 mmol, 3.0 equiv) in 5 mL THF was stirred at  $75\text{ }^\circ\text{C}$  in an oil bath under Ar for 30 min. Afterward, a solution of compound **S1** (2.0 mmol, 1.0 equiv) in 3 mL THF was added, and the reaction solution was stirred at  $75\text{ }^\circ\text{C}$  in the same oil bath for 8 h. Upon completion, the reaction was cooled to room temperature, and the mixture was filtered through a Celite. The filtrate was concentrated under reduced pressure, and the residue was purified by a silica gel chromatography (EtOAc:hexane = 1:100) to afford the corresponding products (**S2**).

#### General procedure A for preparation of methyl benzoylbenzoate:

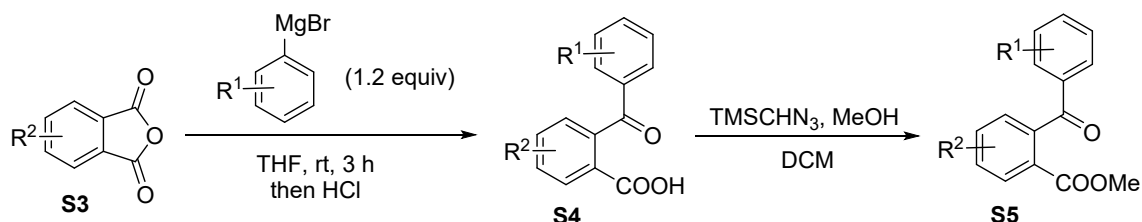

To a solution of phthalic anhydride (**S3**) (10 mmol, 1.0 equiv) in THF (20 mL) was added Grignard reagent (12 mmol, 1.2 equiv) at  $0\text{ }^\circ\text{C}$ . The reaction solution was stirred at room temperature for 3 h, quenched with 2 M HCl (10 mL), extracted with EtOAc (3 x 8 mL), dried over anhydrous  $Na_2SO_4$  and concentrated under reduced pressure. Purification by chromatography on silica gel (EtOAc:hexane) afforded **S4**.

To a solution of **S4** (5 mmol, 1.0 equiv) in 20 mL DCM was added 1 mL MeOH, then azidotrimethylsilane was added into the reaction solution dropwise until no obvious bubbles could be observed. Purification by chromatography on silica gel (EtOAc:hexane) afforded **S5**.

This method was applied for the synthesis of substrates **1b**, **1c**, **1d**, **1h**, **1i**, and **1j**.

### General procedure B for preparation of methyl benzoylbenzoate:

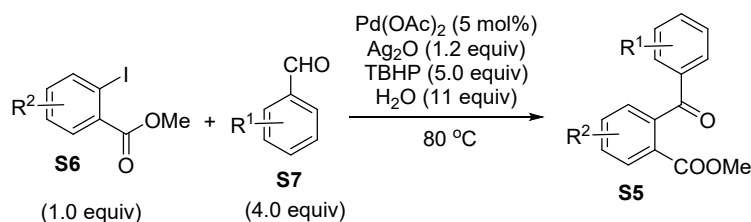

**S6** was prepared with the similar procedures according to the previous protocol.<sup>1</sup>

**1a**, **1b**, **1c**, **1d**, **1g**, **1h**, **1i**, **1j**, **1k**, **1l**, **1m** and **1n** are known compounds that have been synthesized in our previous work.<sup>2</sup>

This method was applied for the synthesis of substrates **1e**, **1f**, **1g**, **1k**, **1l**, **1m**, and **1n**.

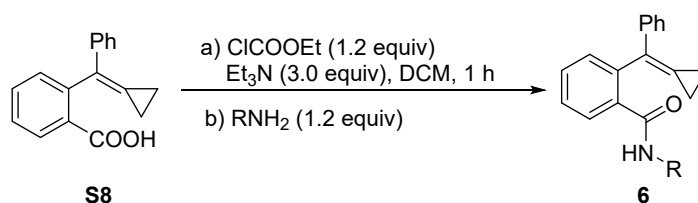

The preparation of **S8** was according to the previous literature.<sup>2</sup>

**S8** (2 mmol, 1.0 equiv) was added into a dried flask, protected with argon, and then 5 mL dried DCM was injected. Followed by adding Et<sub>3</sub>N (6 mmol, 3.0 equiv), ethyl chloroformate (2.4 mmol, 1.4 equiv) was added slowly, and the resulting reaction mixture was stirred for 1 h at room temperature. Afterward, amines were added into the solution dropwise. After 30 min, the reaction solution was quenched with aqueous NH<sub>4</sub>Cl, extracted with EtOAc, dried over anhydrous Na<sub>2</sub>SO<sub>4</sub>, and concentrated under reduced pressure, and then the residue was purified with a silica gel column chromatography using PE:EtOAc (6:1) as the eluent.

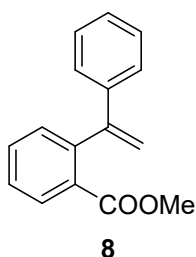

---

The preparation of **8** was according to the previous literature.<sup>2</sup>

Ref. 1. B. Suchand and G. Satyanarayana, *J. Org. Chem.*, 2016, **81**, 6409-6423.

Ref. 2. Wei, H.-Z., Wei, Y. and Shi, M. *Org. Chem. Front.* 2021, **8**, 4527-4532.

Ref. 3. H. Yang, X.-H. Duan, J.-F. Zhao and L.-N. Guo, *Org. Lett.*, 2015, **17**, 1998–2001.

#### 4. General procedure of cyclization reactions

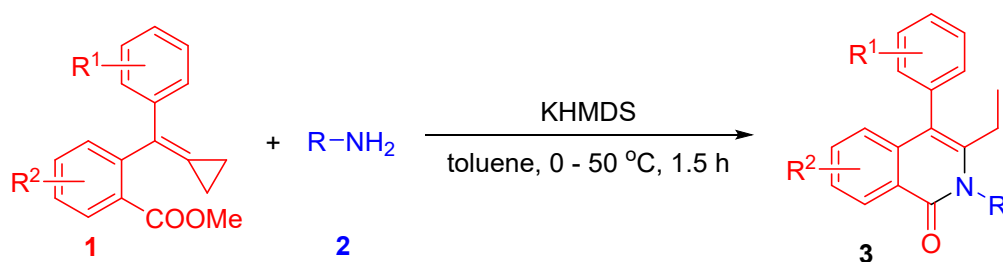

First, the methyl ester **1** (0.2 mmol) and the aromatic amine **2** (0.24 mmol) were added into a dried flask, protected by argon atmosphere. Then 2 mL dried toluene was added, and the reaction solution was cooled to 0 °C in an ice water bath. Afterward, 0.4 mL KHMDS (1 M in THF) was added into the solution slowly. Subsequently, the flask was heated at 50 °C for 1.5 h. Followed by quenching with water, extracted with EtOAc for three times, dried over anhydrous Na<sub>2</sub>SO<sub>4</sub>, and concentrated under reduced pressure, the residue was purified with a silica gel column chromatography using PE/EtOAc as the eluent (PE:EtOAc = 4:1). The gram scale reaction was carried out according to the same procedure.

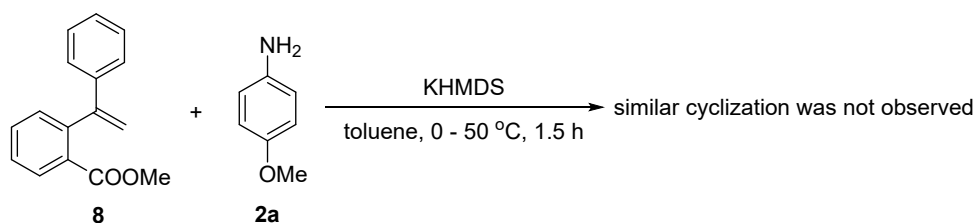

When we applied **8** instead of **1a** for the reaction, the similar cyclization was not observed and only S<sub>N</sub>2 reaction product was obtained.

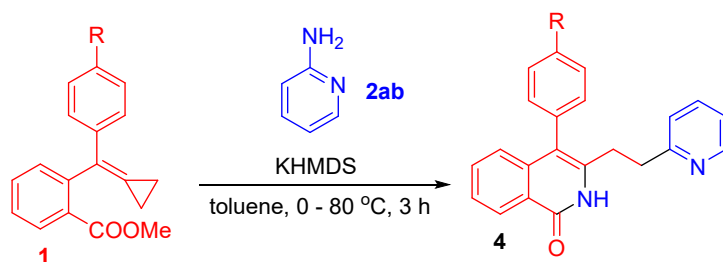

First, the methyl ester **1** (0.2 mmol) and the aromatic amine **2** (0.24 mmol) were added into a dried flask, protected by argon atmosphere. Then 2 mL dried toluene was added, and the reaction solution was cooled to 0 °C in an ice water bath. Afterward, 0.4 mL KHMDS (1 M in THF) was added into the solution slowly. Subsequently, the flask was heated at 80 °C for 3 h. Followed by quenching with water, extracted with EtOAc for three times, dried over anhydrous Na<sub>2</sub>SO<sub>4</sub>, and concentrated under reduced pressure, the residue was purified with a silica gel column chromatography using EtOAc (a small amount of Et<sub>3</sub>N was added) as the eluent.

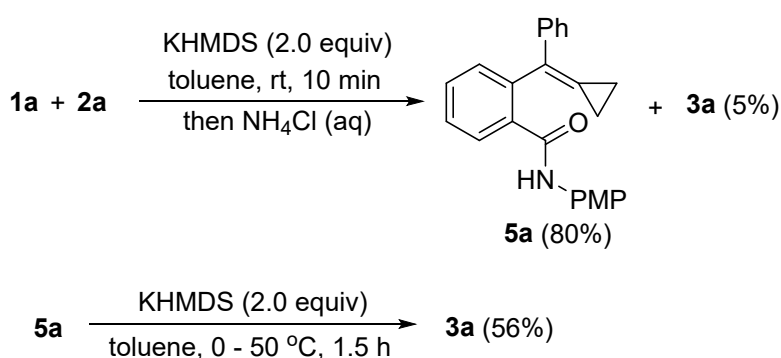

First, **1a** (0.2 mmol) and **2a** (0.24 mmol) were added into a dried flask, protected by argon atmosphere. Then 2 mL dried toluene was added, and the reaction mixture was stirred at room temperature. Subsequently, 0.4 mL KHMDS (1.0 M in THF) was added into the solution slowly. The reaction was quenched with saturated aqueous NH<sub>4</sub>Cl in 10 minutes. The desired product **3a** was observed in 5% yield from the crude <sup>1</sup>H NMR spectroscopic data, and **5a** was isolated in 80% yield.

Afterward, compound **5a** (0.1 mmol) was added into a dried flask, protected by argon atmosphere. Then 2.0 mL dried toluene was added, and the reaction solution was cooled to 0 °C in an ice water bath. Then 0.2 mL KHMDS (1.0 M in THF) was added into the solution slowly. Subsequently, the flask was heated at 50 °C for 1.5 h. Followed by quenching with water, extracted with EtOAc for three times, dried over anhydrous Na<sub>2</sub>SO<sub>4</sub>, and concentrated under reduced pressure, the residue was purified with a silica gel column chromatography using PE/EtOAc as the eluent (PE:EtOAc = 4:1), affording **3a** in 56% yield.



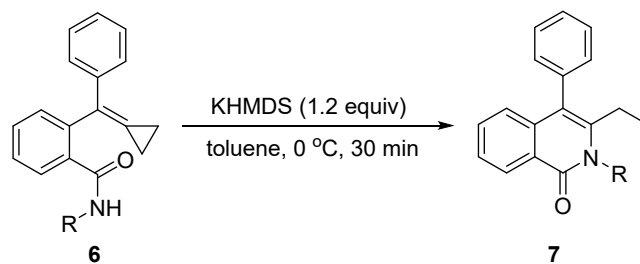

First, compound **6** (0.2 mmol) was added into a dried flask, protected by argon atmosphere. Then 2 mL dried toluene was added, and the reaction solution was cooled to 0 °C in an ice water bath. Afterward, 0.24 mL KHMDS (1.0 M in THF) was added into the solution slowly. Subsequently, the reaction mixture in the flask was stirred at 0 °C for 30 min. Followed by quenching with water, extracted with EtOAc for three times, dried over anhydrous Na<sub>2</sub>SO<sub>4</sub>, and concentrated under reduced pressure, the residue was purified with a silica gel column chromatography using PE:EtOAc (10:1) as the eluent.

## 5. Characterization and spectra charts

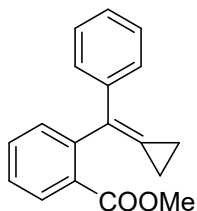

**Compound 1a:** Yield: 0.43 g, 81%; A white solid; this is a known compound;<sup>2</sup>  $^1\text{H}$  NMR (400 MHz, Chloroform-*d*)  $\delta$  7.84 (dd,  $J = 7.7, 1.5$  Hz, 1H), 7.50 (td,  $J = 7.5, 1.5$  Hz, 1H), 7.42 – 7.34 (m, 4H), 7.31 – 7.24 (m, 2H), 7.21 – 7.16 (m, 1H), 3.49 (s, 3H), 1.59 – 1.53 (m, 2H), 1.20 – 1.12 (m, 2H);  $^{13}\text{C}$  NMR (100 MHz, Chloroform-*d*)  $\delta$  168.4, 142.0, 140.6, 131.4, 131.3, 131.2, 129.8, 129.7, 128.0, 127.0, 126.61, 126.56, 123.9, 51.8, 5.3, 1.9.

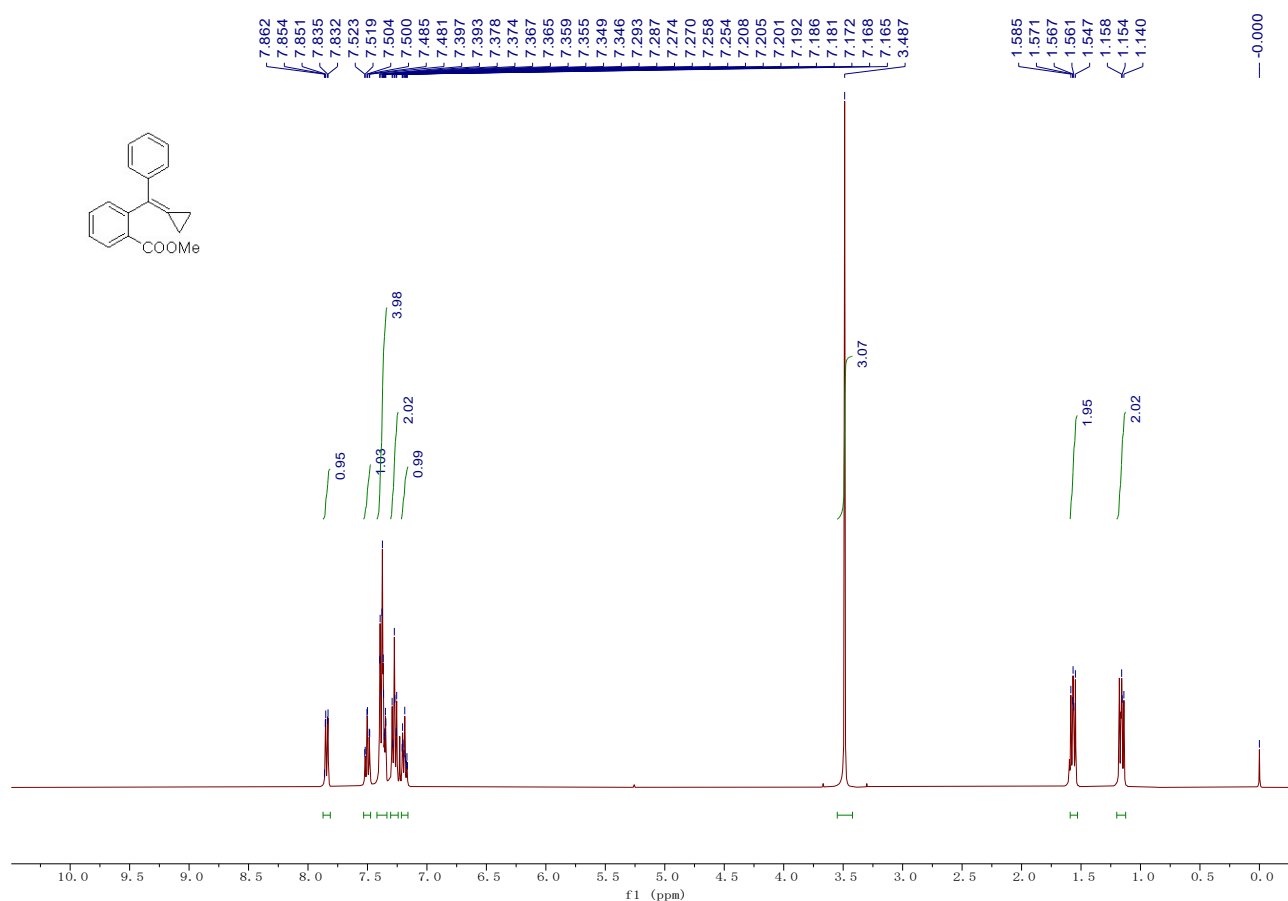

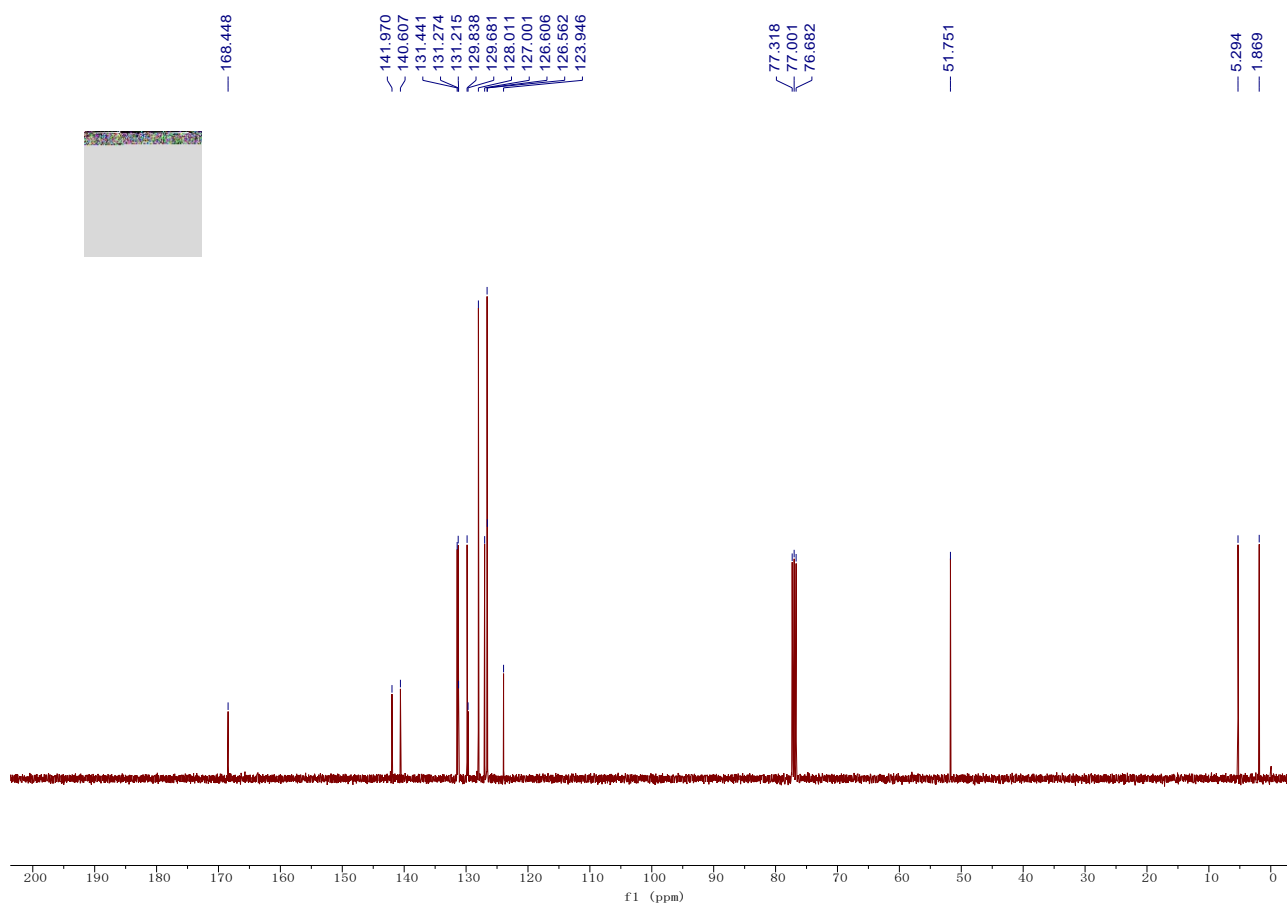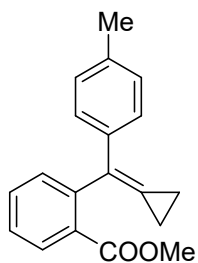

**Compound 1b:** Yield: 0.29 g, 40%; A yellow faint oil; this is a known compound;<sup>2</sup>  $^1\text{H}$  NMR (400 MHz, Chloroform-*d*)  $\delta$  7.83 (dd,  $J = 7.7, 1.5$  Hz, 1H), 7.49 (td,  $J = 7.5, 1.5$  Hz, 1H), 7.41 – 7.31 (m, 2H), 7.28 (d,  $J = 7.9$  Hz, 2H), 7.08 (d,  $J = 7.9$  Hz, 2H), 3.50 (s, 3H), 2.31 (s, 3H), 1.58 – 1.51 (m, 2H), 1.18 – 1.11 (m, 2H);  $^{13}\text{C}$  NMR (100 MHz, Chloroform-*d*)  $\delta$  168.6, 142.1, 137.8, 136.2, 131.4, 131.24, 131.22, 129.8, 129.5, 128.7, 126.9, 126.5, 122.9, 51.8, 21.1, 5.2, 1.8.

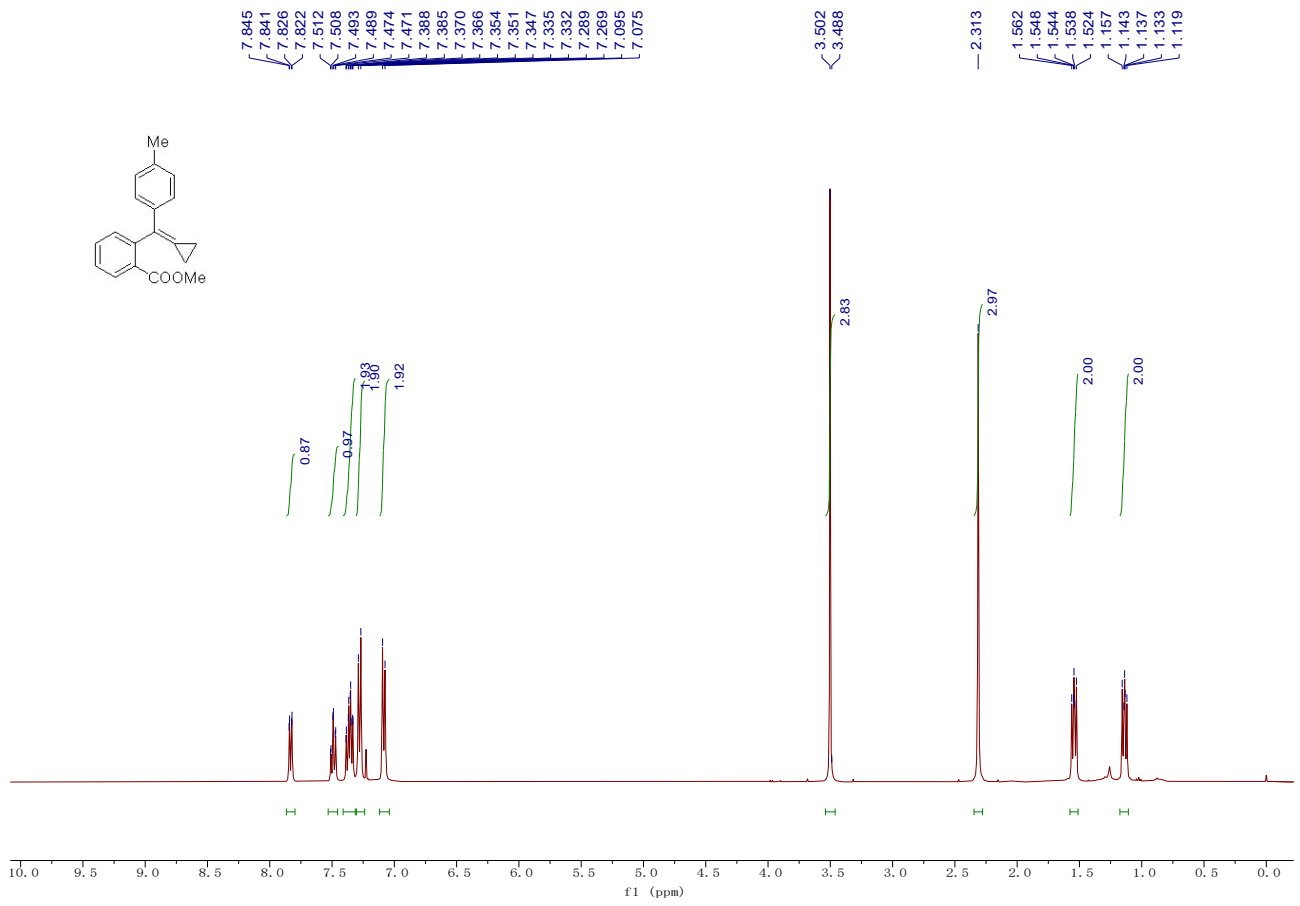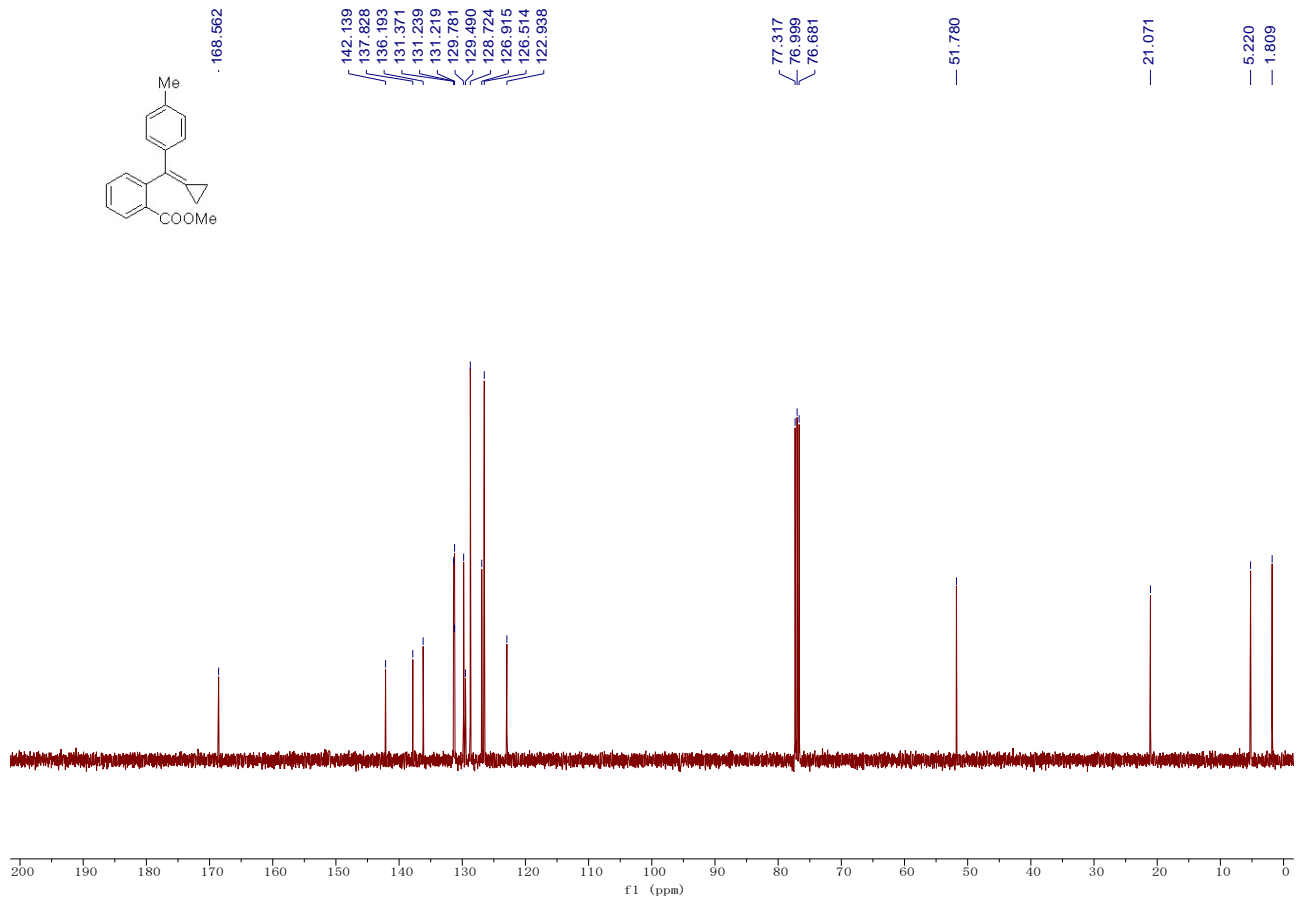

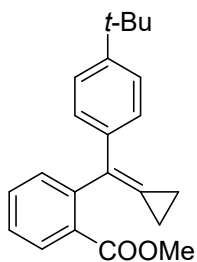

**Compound 1c:** Yield: 0.35 g, 55%; A yellow faint oil; this is a known compound;<sup>2</sup>  $^1\text{H}$  NMR (400 MHz, Chloroform-*d*)  $\delta$  7.86 – 7.78 (m, 1H), 7.45 (t,  $J = 7.4$  Hz, 1H), 7.37 – 7.26 (m, 6H), 3.47 (s, 3H), 1.58 – 1.50 (m, 2H), 1.29 (s, 9H), 1.16 – 1.08 (m, 2H);  $^{13}\text{C}$  NMR (100 MHz, Chloroform-*d*)  $\delta$  168.5, 149.3, 142.1, 137.7, 131.31, 131.27, 131.2, 129.7, 129.4, 126.9, 126.3, 124.9, 123.1, 51.7, 34.4, 31.2, 5.2, 1.8.

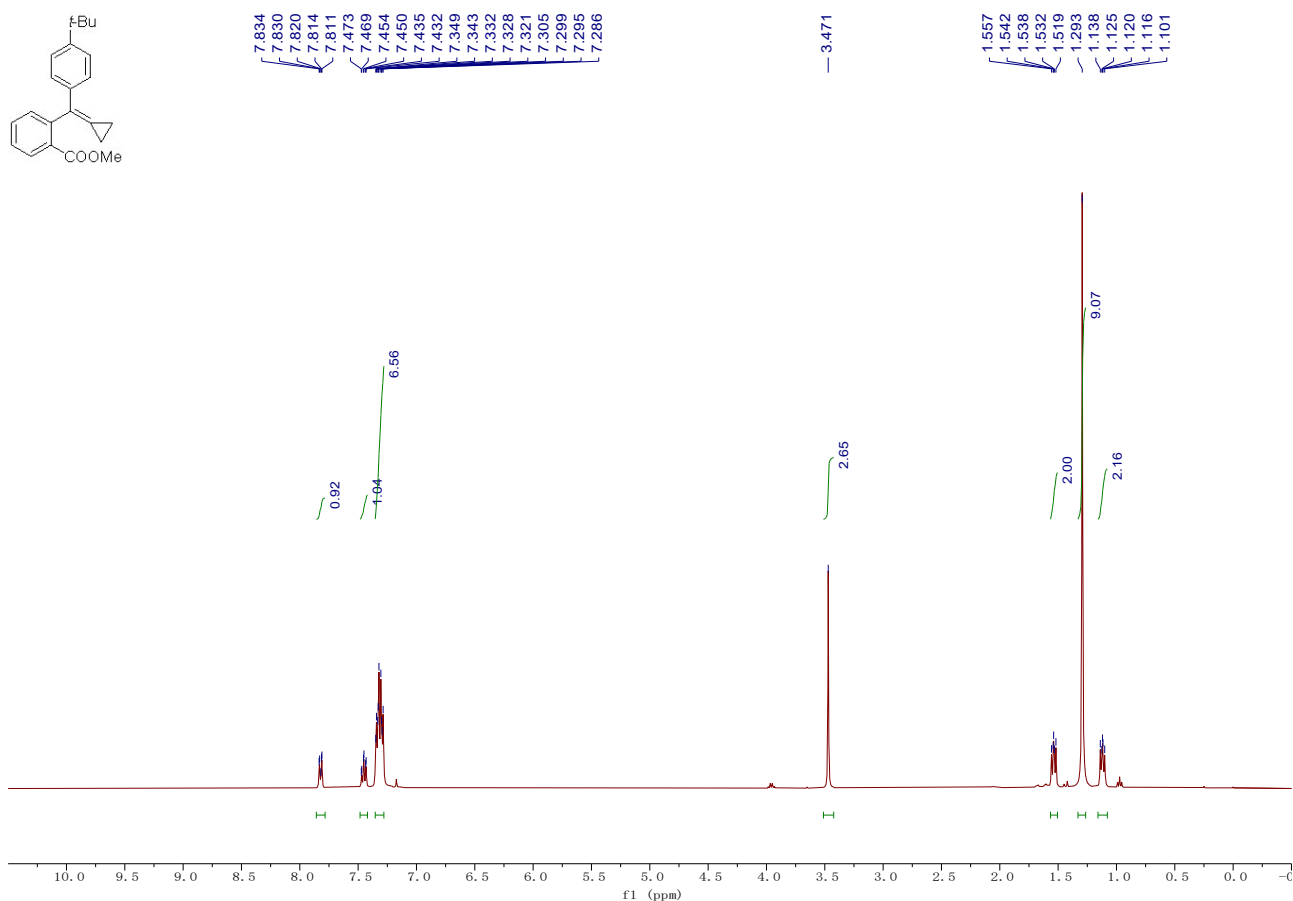

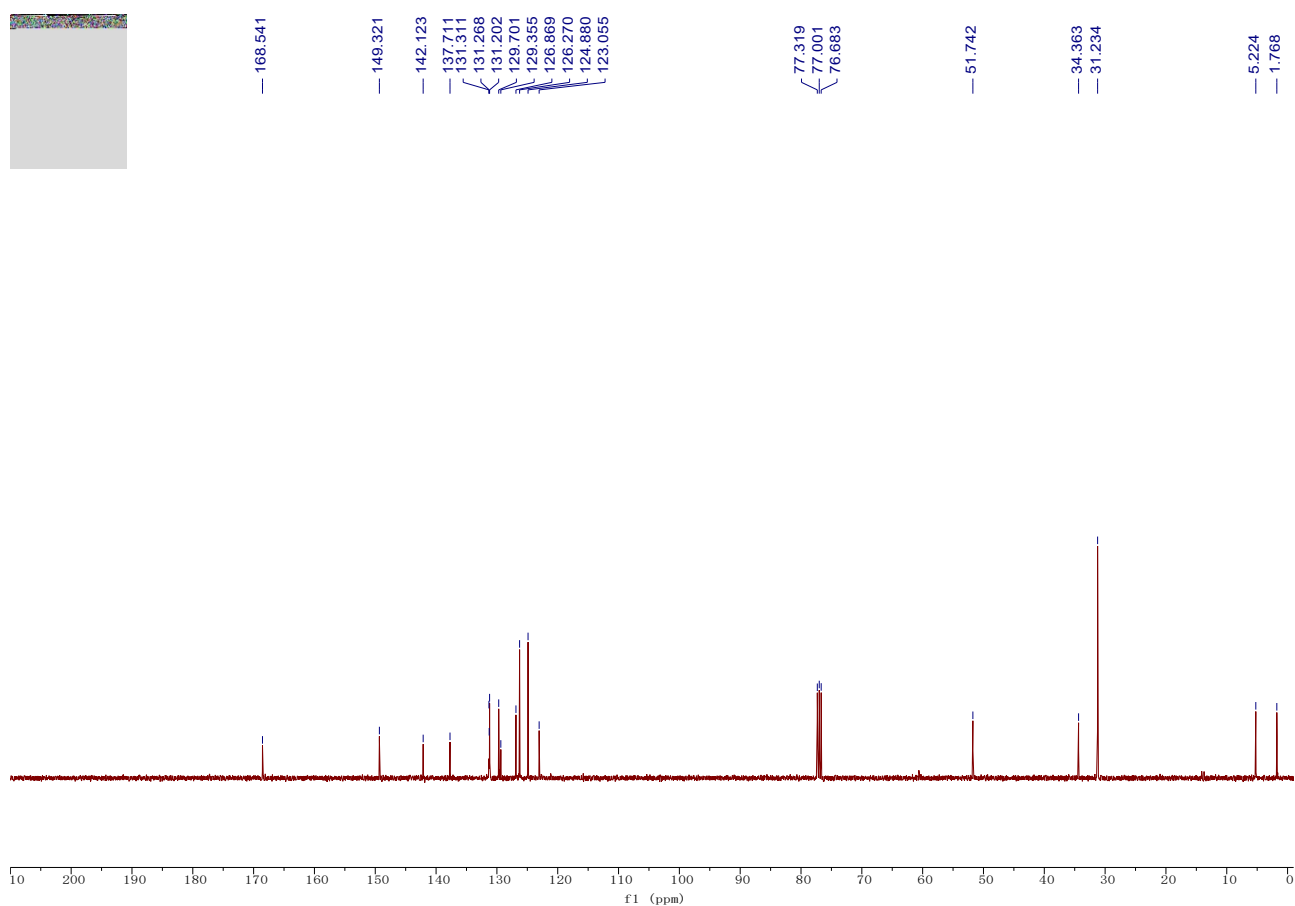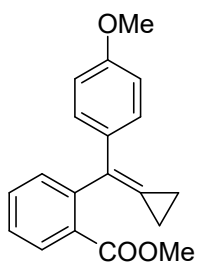

**Compound 1d:** Yield: 0.28 g, 47%; A yellow faint oil; this is a known compound;<sup>2</sup> <sup>1</sup>H NMR (400 MHz, Chloroform-*d*)  $\delta$  7.84 – 7.81 (m, 1H), 7.53 – 7.47 (m, 1H), 7.41 – 7.29 (m, 4H), 6.82 (d,  $J$  = 8.8 Hz, 2H), 3.79 (s, 3H), 3.52 (s, 3H), 1.58 – 1.50 (m, 2H), 1.17 – 1.10 (m, 2H); <sup>13</sup>C NMR (100 MHz, Chloroform-*d*)  $\delta$  168.6, 158.3, 142.2, 133.5, 131.4, 131.3, 131.2, 129.8, 129.1, 127.8, 126.9, 121.9, 113.4, 55.2, 51.8, 5.2, 1.8.

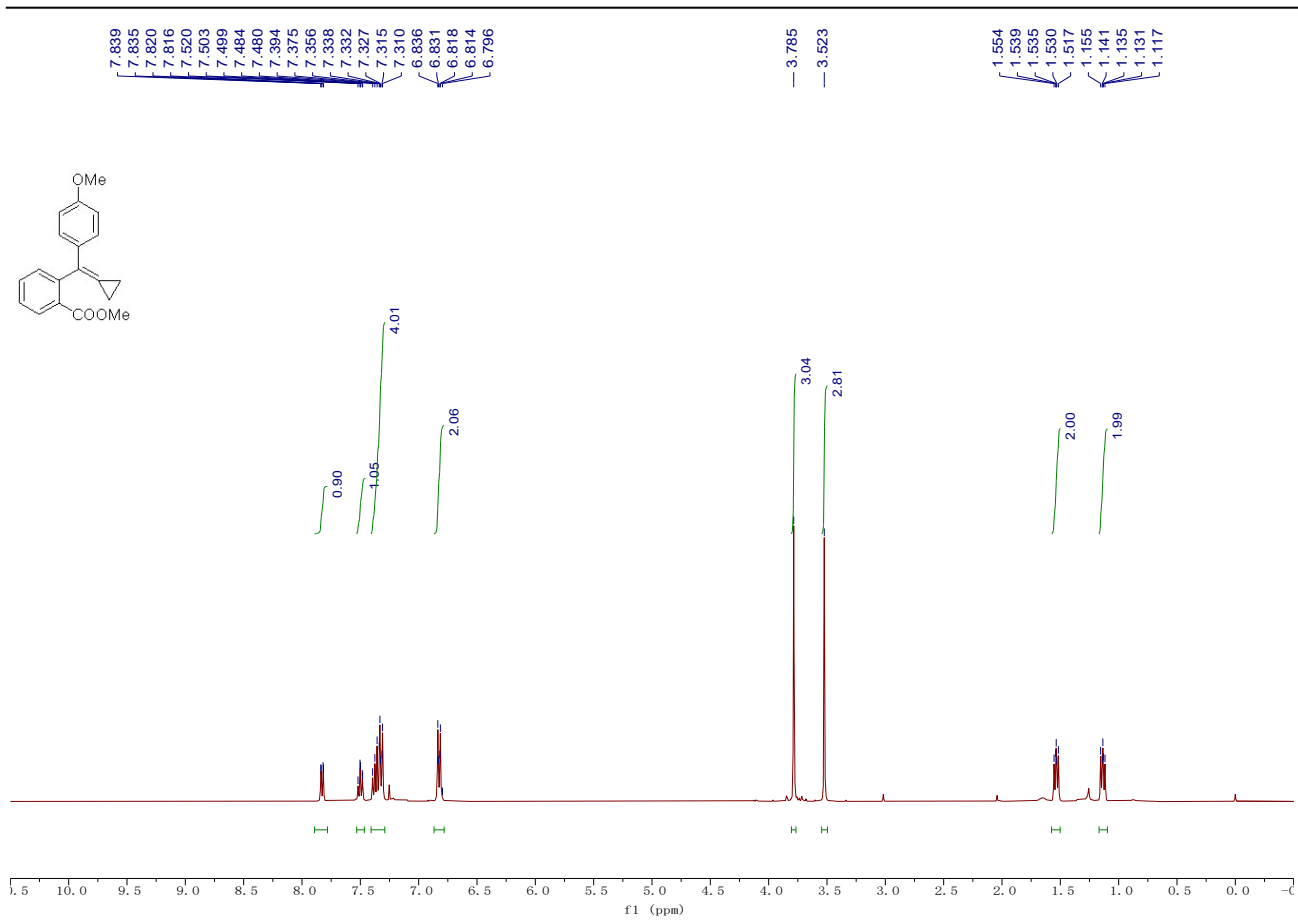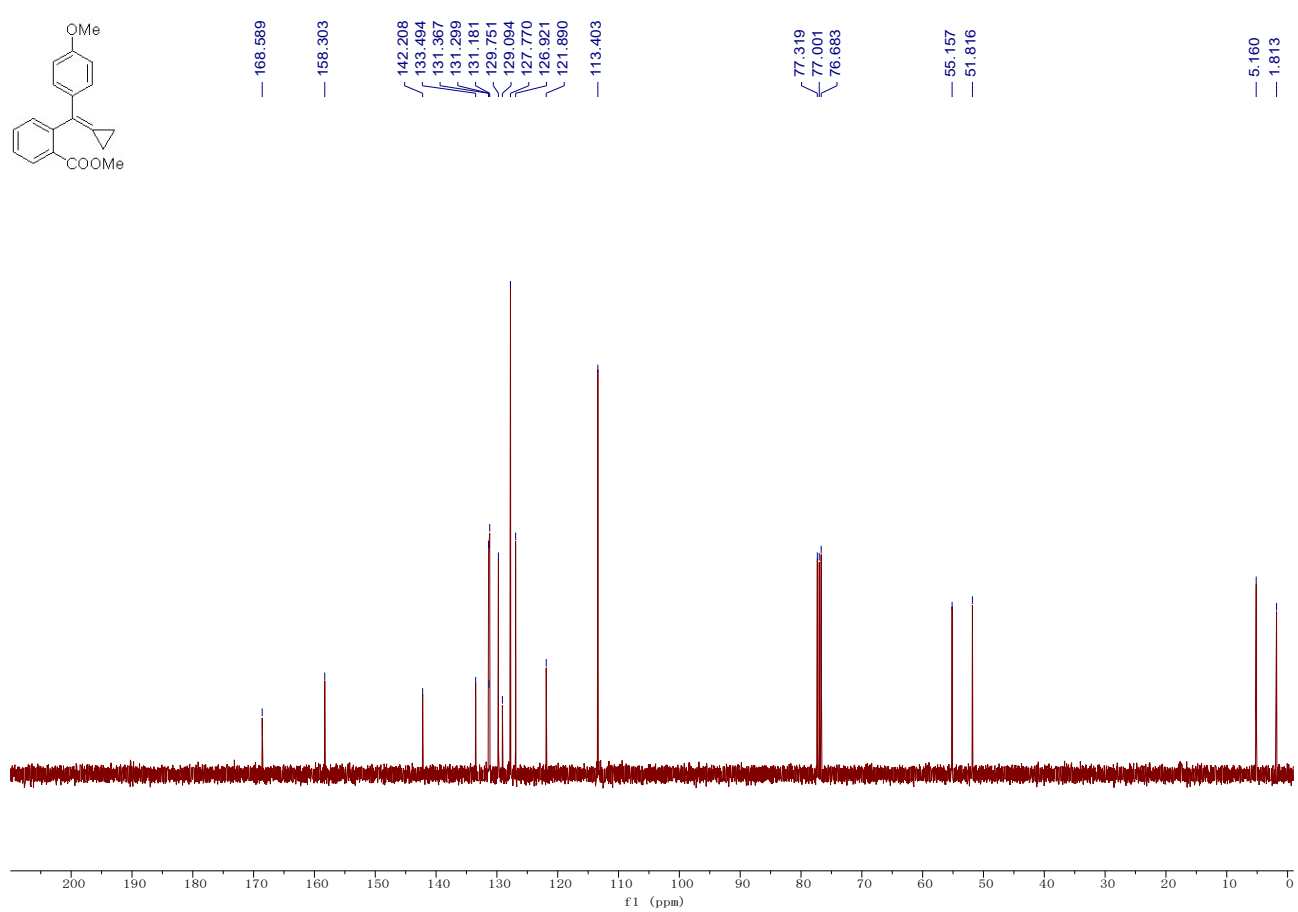

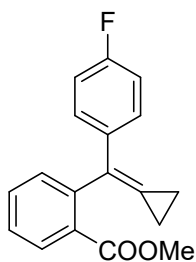

**Compound 1e:** Yield: 0.32 g, 56%; A yellow faint oil; Isolated by column chromatography on silica gel (PE/EtOAc = 100:1,  $R_f = 0.2$ );  $^1\text{H NMR}$  (400 MHz, Chloroform-*d*)  $\delta$  7.88 – 7.82 (m, 1H), 7.51 (t,  $J = 7.5$  Hz, 1H), 7.43 – 7.31 (m, 4H), 6.96 (t,  $J = 8.7$  Hz, 2H), 3.53 (s, 3H), 1.58 – 1.50 (m, 2H), 1.20 – 1.11 (m, 2H);  $^{13}\text{C NMR}$  (100 MHz, Chloroform-*d*)  $\delta$  168.3, 161.6 (d,  $J = 245.8$  Hz), 141.8, 136.8 (d,  $J = 3.3$  Hz), 131.6, 131.2, 131.1, 129.9, 128.7, 128.1 (d,  $J = 7.9$  Hz), 127.1, 123.6 (d,  $J = 1.9$  Hz), 114.8 (d,  $J = 21.4$  Hz), 51.8, 5.2, 2.0;  $^{19}\text{F NMR}$  (376 MHz, Chloroform-*d*)  $\delta$  -115.93 – -116.03 (m); IR (neat):  $\nu$  2943, 1723, 1506, 1288, 1251, 1222, 1086, 833, 722  $\text{cm}^{-1}$ ; HRMS (EI) Calcd. for  $\text{C}_{18}\text{H}_{14}\text{FO}_2$  [M-H] $^-$ : 281.0972, found: 281.0975.

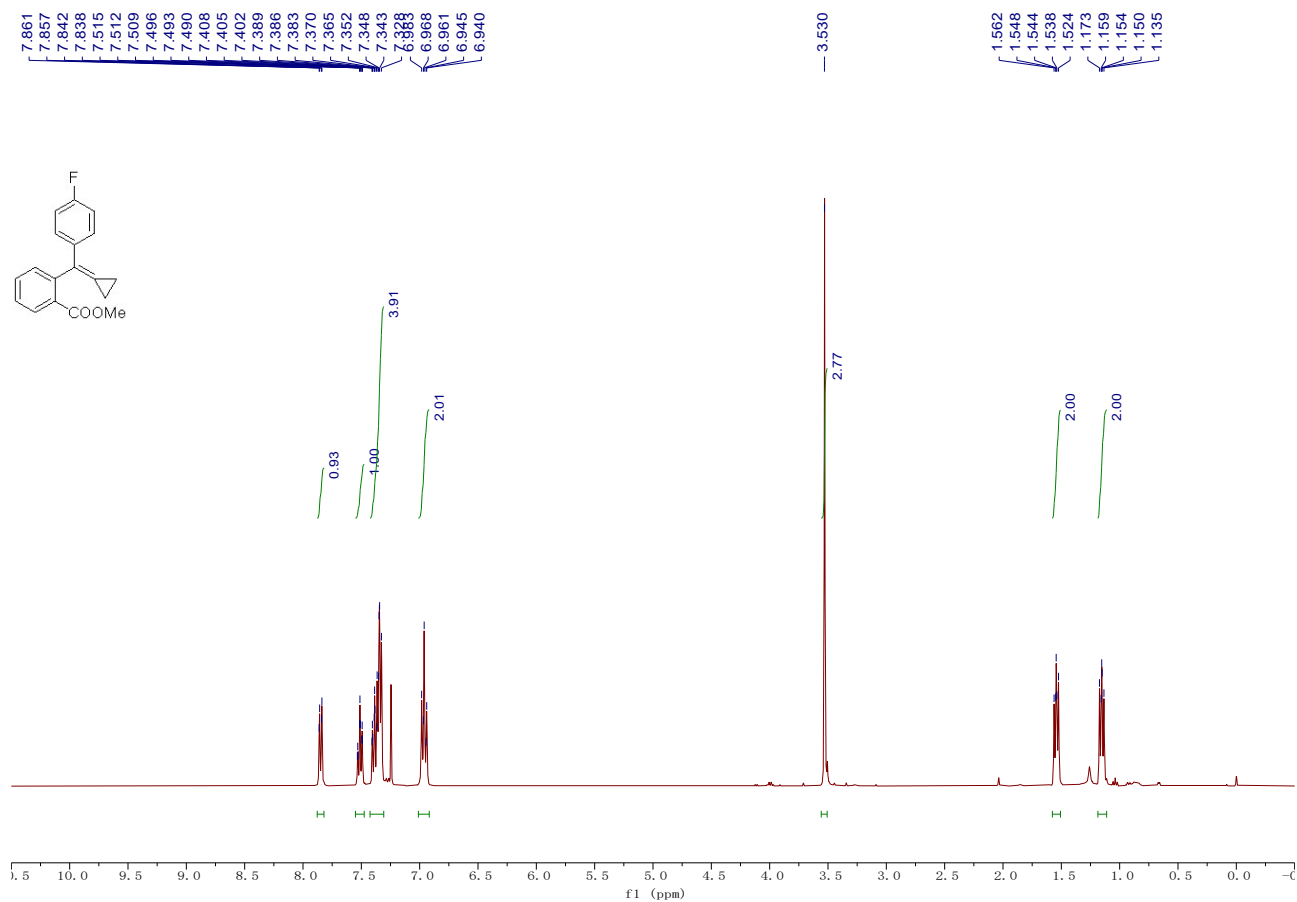



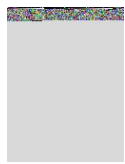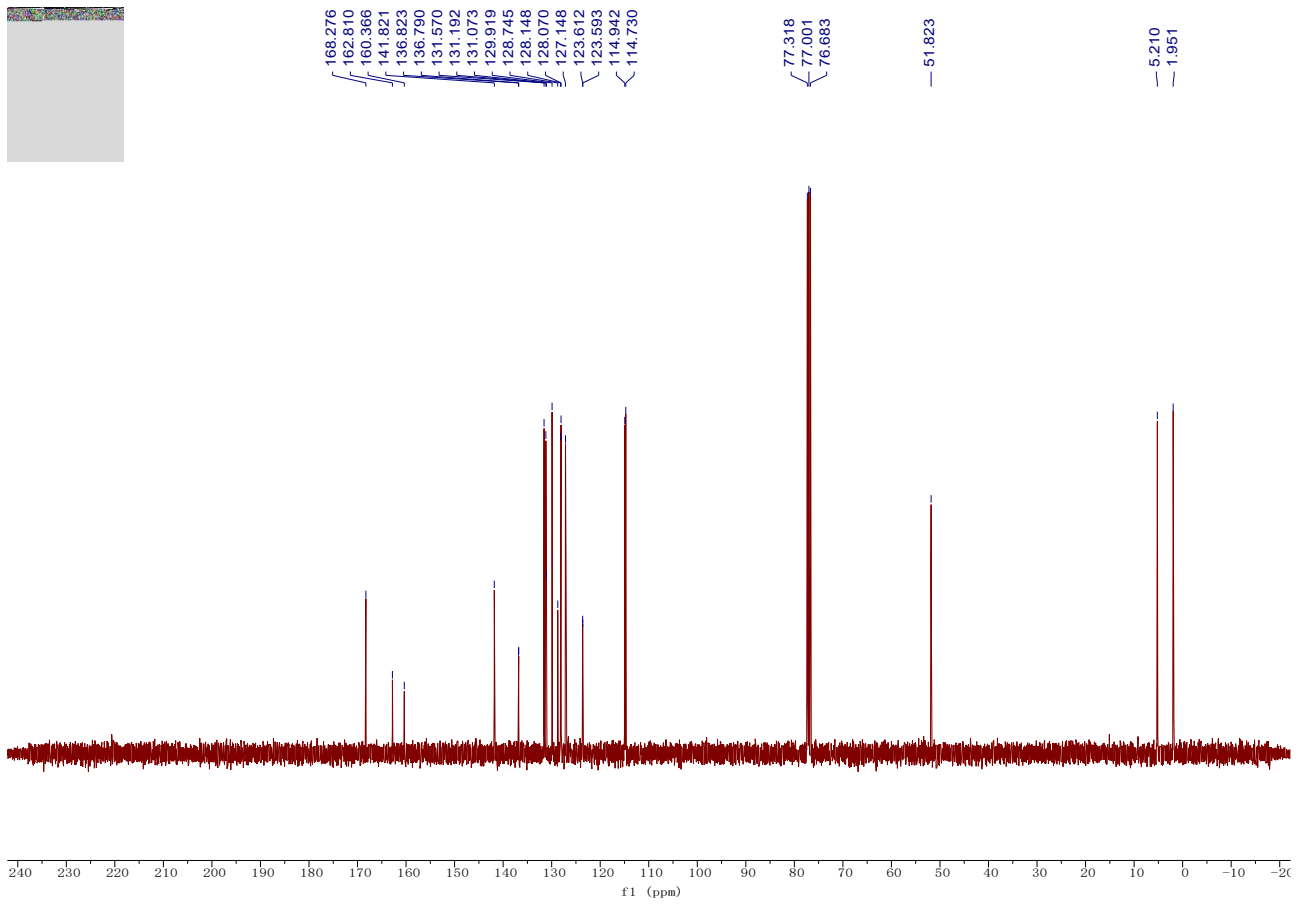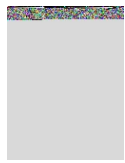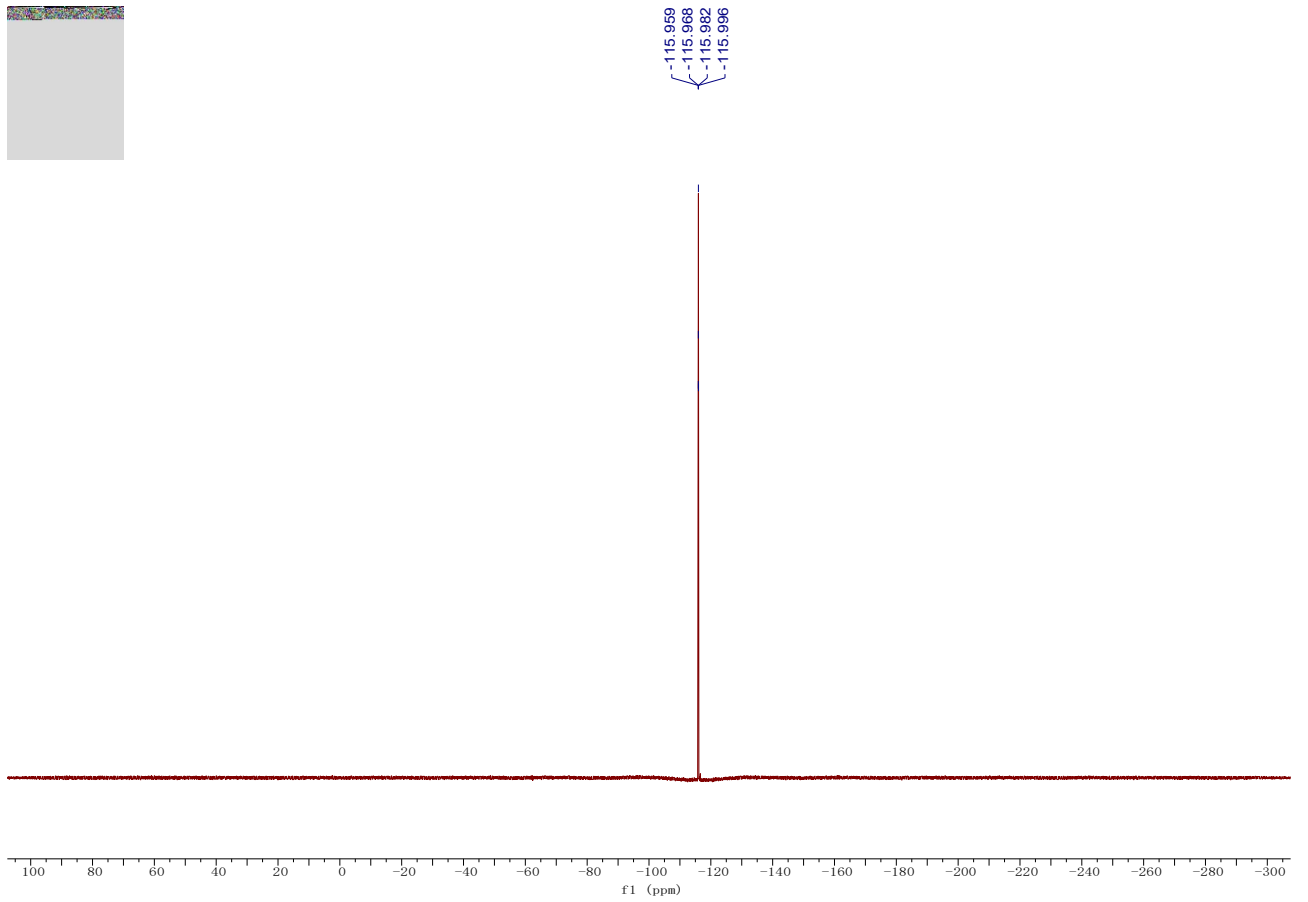

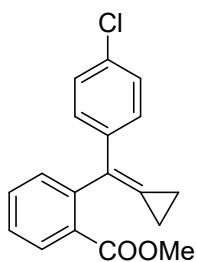

**Compound 1f:** Yield: 0.29 g, 49%; A white solid; Mp: 116 - 118 °C; Isolated by column chromatography on silica gel (PE/EtOAc = 100:1,  $R_f = 0.3$ );  $^1\text{H}$  NMR (400 MHz, Chloroform-*d*)  $\delta$  7.87 (d,  $J = 7.5$  Hz, 1H), 7.53 (t,  $J = 7.5$  Hz, 1H), 7.40 (t,  $J = 7.7$  Hz, 1H), 7.36 – 7.28 (m, 3H), 7.28 – 7.21 (m, 2H), 3.54 (s, 3H), 1.60 – 1.52 (m, 2H), 1.20 – 1.11 (m, 2H);  $^{13}\text{C}$  NMR (100 MHz, Chloroform-*d*)  $\delta$  168.2, 141.6, 139.2, 132.2, 131.7, 131.2, 131.0, 130.0, 128.8, 128.2, 127.8, 127.2, 124.5, 51.9, 5.4, 1.9; IR (neat):  $\nu$  2943, 1707, 1292, 1122, 1089, 818, 759  $\text{cm}^{-1}$ ; HRMS (EI) Calcd. for  $\text{C}_{18}\text{H}_{14}\text{ClO}_2$  [M-H] $^-$ : 297.0677, found: 297.0676.

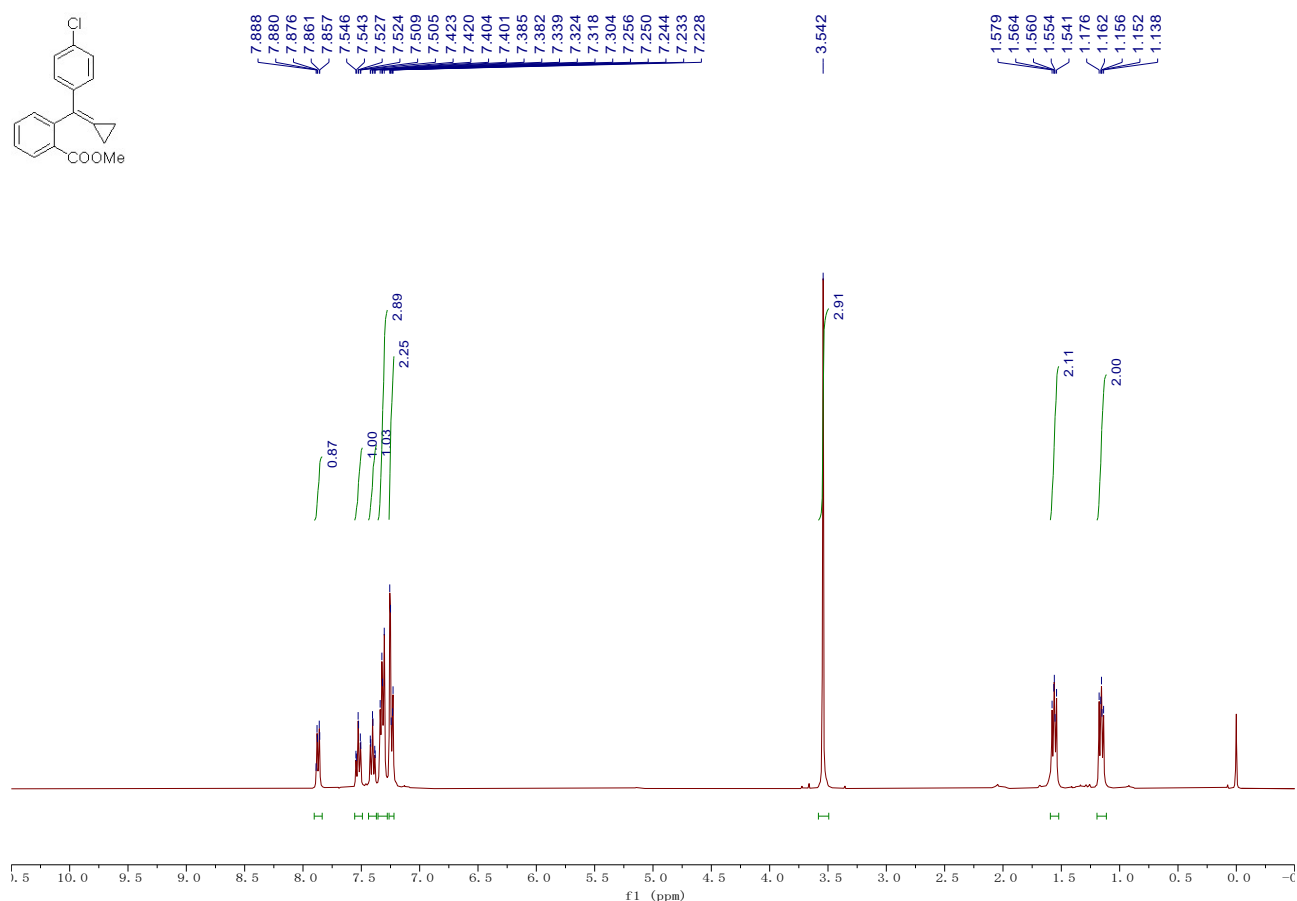

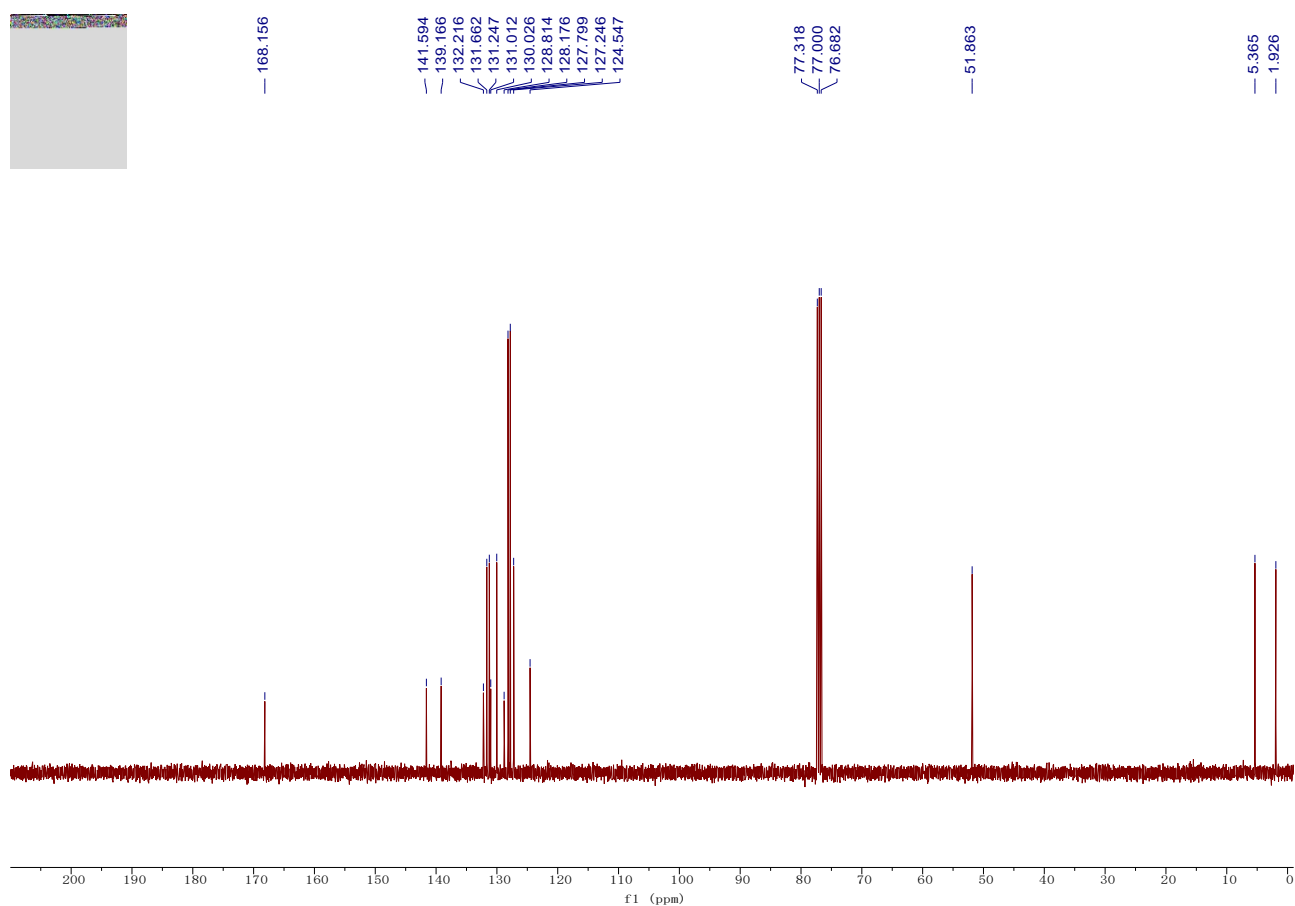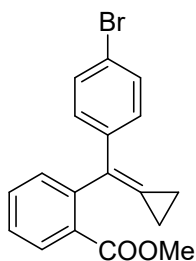

**Compound 1g:** Yield: 0.52 g, 76%; A white solid; this is a known compound;<sup>2</sup> <sup>1</sup>H NMR (400 MHz, Chloroform-*d*)  $\delta$  7.87 (dd,  $J = 7.8, 1.5$  Hz, 1H), 7.53 (td,  $J = 7.5, 1.5$  Hz, 1H), 7.44 – 7.36 (m, 3H), 7.32 (dd,  $J = 7.6, 1.3$  Hz, 1H), 7.27 – 7.23 (m, 2H), 3.54 (s, 3H), 1.58 – 1.51 (m, 2H), 1.19 – 1.11 (m, 2H); <sup>13</sup>C NMR (100 MHz, Chloroform-*d*)  $\delta$  168.2, 141.5, 139.6, 131.7, 131.3, 131.1, 131.0, 130.1, 128.9, 128.2, 127.3, 124.7, 120.4, 51.9, 5.4, 2.0.

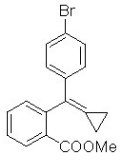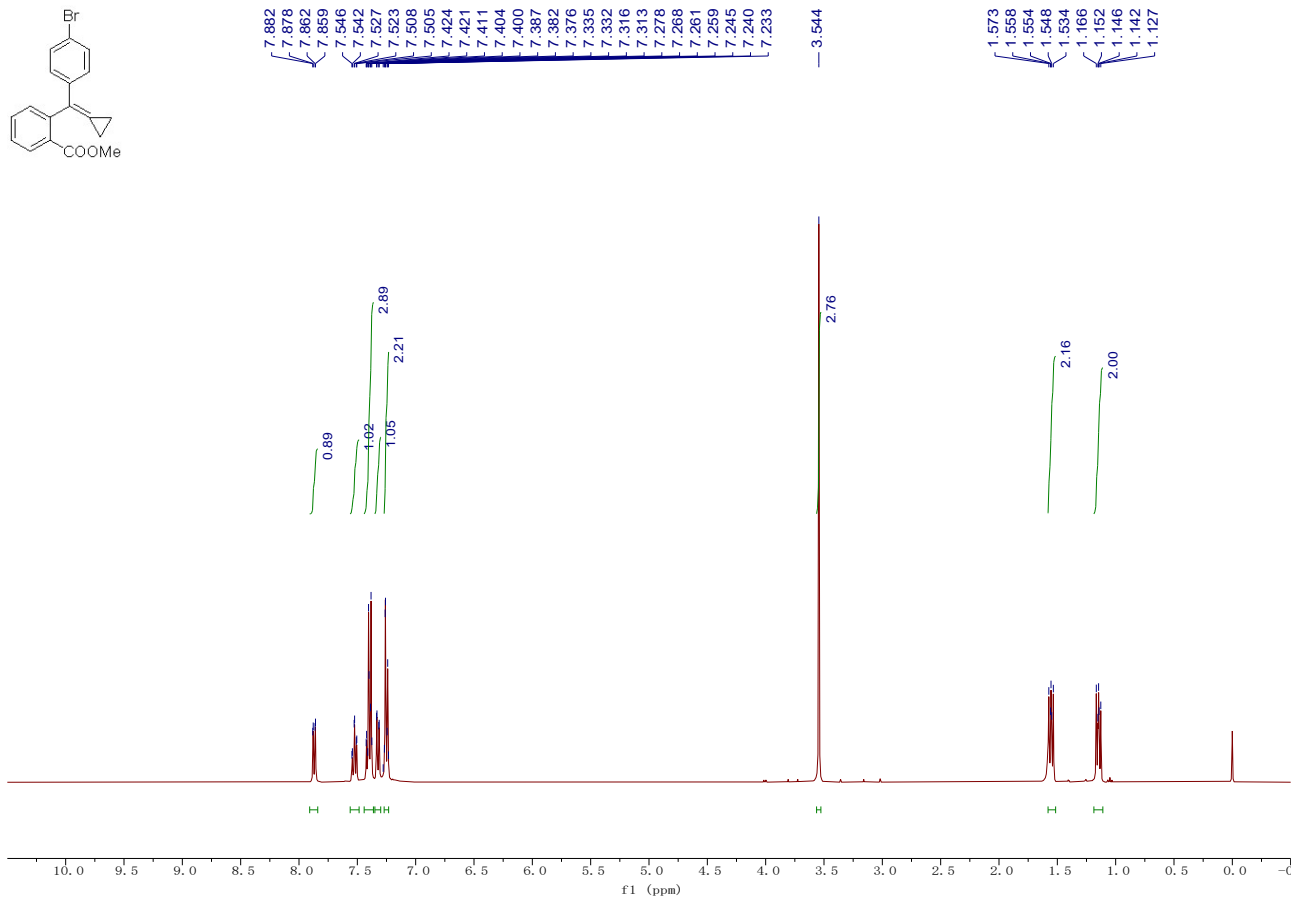

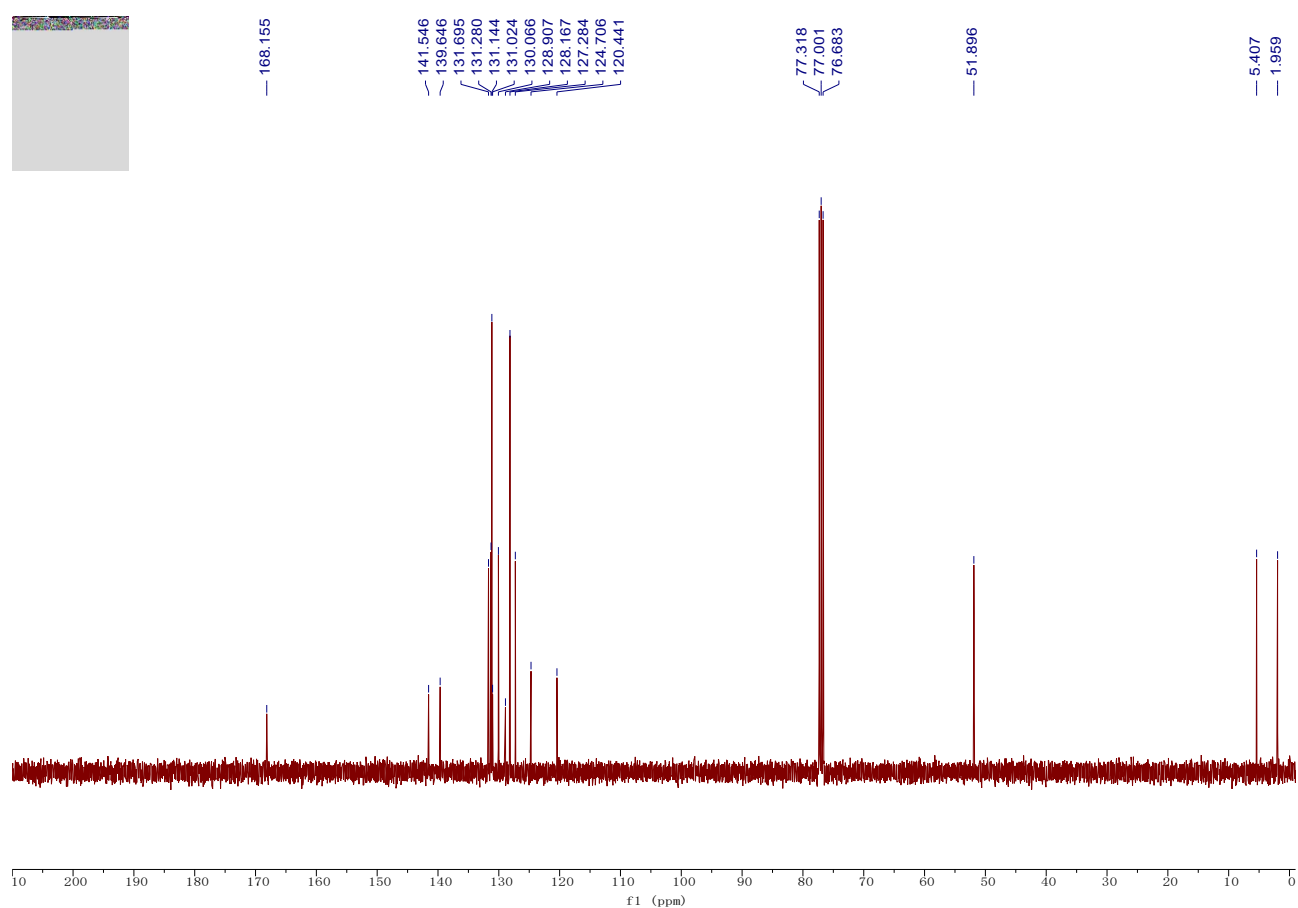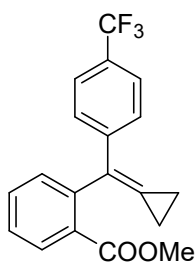

**Compound 1h:** Yield: 0.27 g, 40%; A yellow faint oil; this is a known compound;<sup>2</sup>  $^1\text{H}$  NMR (400 MHz, Chloroform-*d*)  $\delta$  7.96 – 7.87 (m, 1H), 7.58 – 7.46 (m, 5H), 7.42 (td,  $J = 7.6, 1.5$  Hz, 1H), 7.37 – 7.31 (m, 1H), 3.53 (s, 3H), 1.65 – 1.56 (m, 2H), 1.22 – 1.14 (m, 2H);  $^{13}\text{C}$  NMR (100 MHz, Chloroform-*d*)  $\delta$  167.9, 144.1, 141.3, 131.8, 131.3, 130.9, 130.2, 128.9, 128.3 (q,  $J = 32.3$  Hz), 127.4, 126.62, 126.58, 125.0 (q,  $J = 3.8$  Hz), 124.3 (q,  $J = 271.9$  Hz), 51.8, 5.5, 2.0;  $^{19}\text{F}$  NMR (376 MHz, Chloroform-*d*)  $\delta$  -62.38.

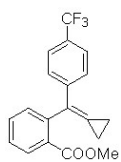

7.915  
7.911  
7.895  
7.891  
7.564  
7.560  
7.544  
7.540  
7.526  
7.523  
7.519  
7.516  
7.495  
7.474  
7.442  
7.438  
7.423  
7.419  
7.404  
7.400  
7.348  
7.344  
7.329  
7.325

3.531

1.625  
1.610  
1.606  
1.600  
1.585  
1.206  
1.192  
1.186  
1.182  
1.167

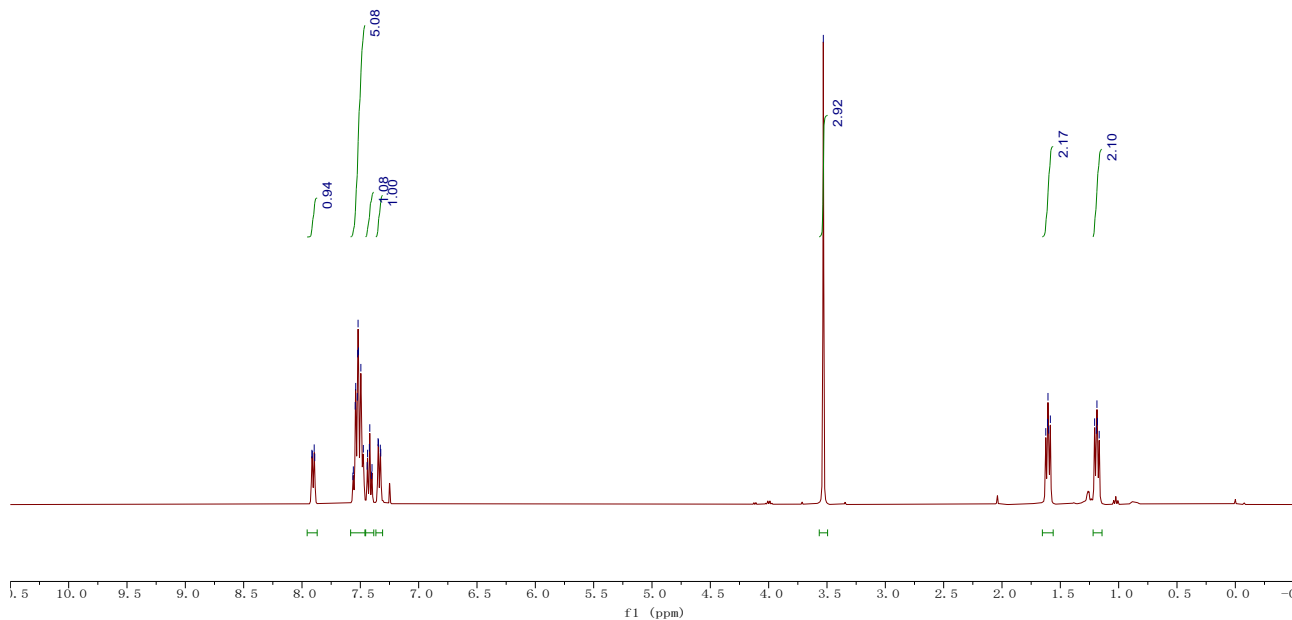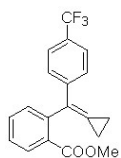

167.934

144.109  
141.320  
131.818  
131.293  
130.856  
130.161  
128.911  
128.459  
128.138  
127.412  
126.619  
126.576  
125.642  
125.009  
124.970  
124.932  
122.939

77.321  
77.002  
76.683

51.838

5.474  
1.969

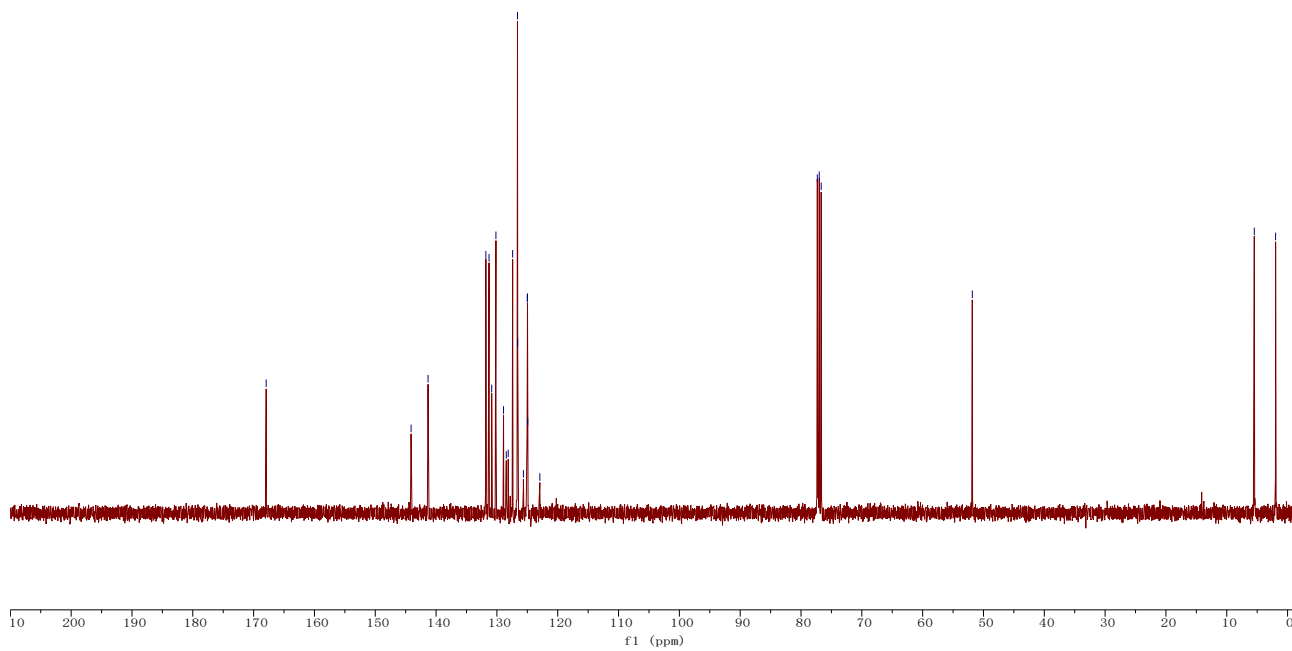

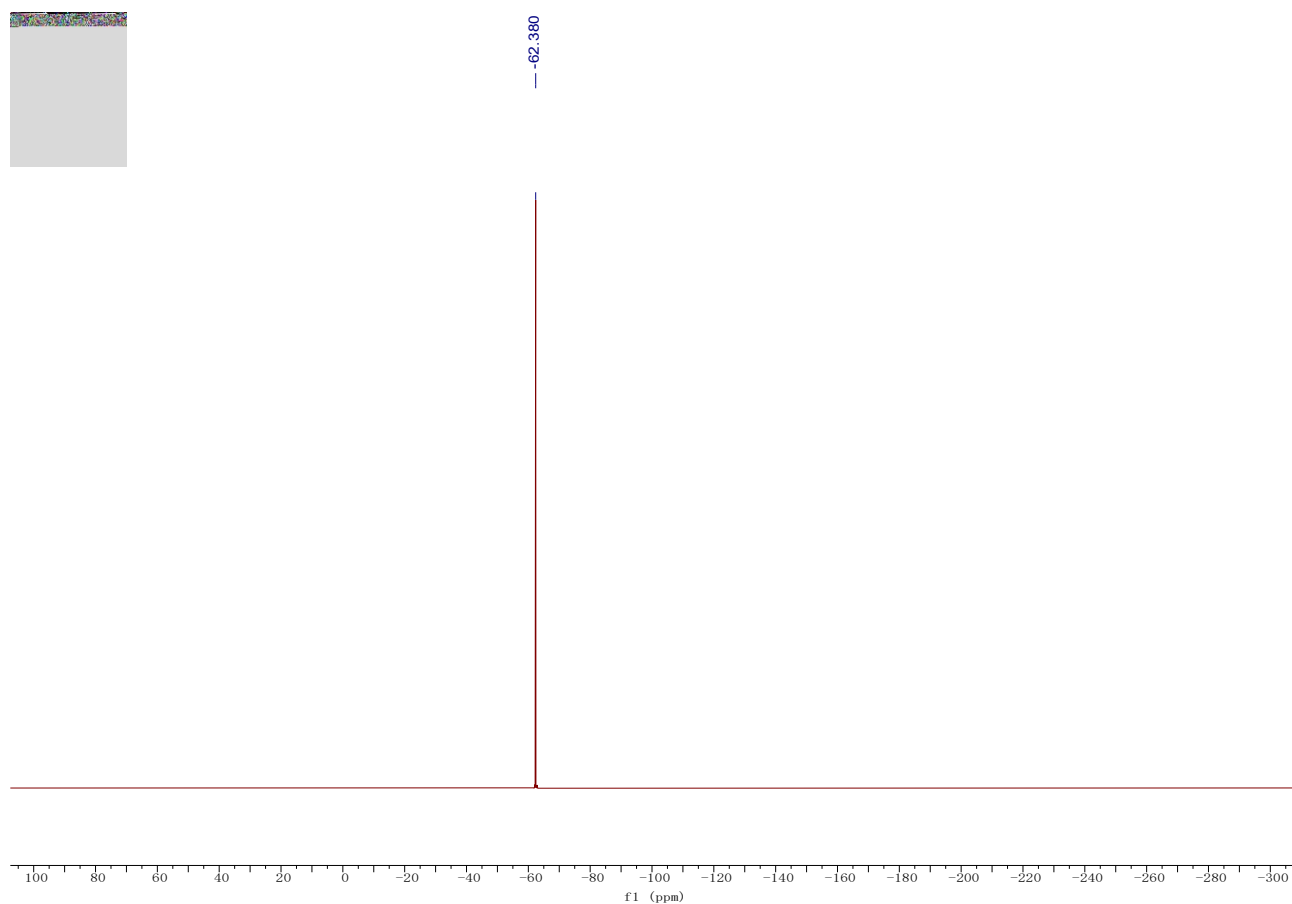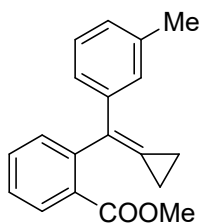

**Compound 1i:** Yield: 0.33 g, 59%; A yellow faint oil; this is a known compound;<sup>2</sup> <sup>1</sup>H NMR (400 MHz, Chloroform-*d*)  $\delta$  7.84 (dd,  $J = 7.7, 1.4$  Hz, 1H), 7.51 (td,  $J = 7.5, 1.5$  Hz, 1H), 7.42 – 7.33 (m, 2H), 7.22 – 7.13 (m, 3H), 7.06 – 6.99 (m, 1H), 3.51 (s, 3H), 2.30 (s, 3H), 1.59 – 1.52 (m, 2H), 1.19 – 1.12 (m, 2H); <sup>13</sup>C NMR (100 MHz, Chloroform-*d*)  $\delta$  168.5, 142.1, 140.5, 137.4, 131.3, 131.2, 129.8, 129.6, 127.9, 127.4, 127.2, 126.9, 123.9, 123.7, 51.7, 21.5, 5.3, 1.8.

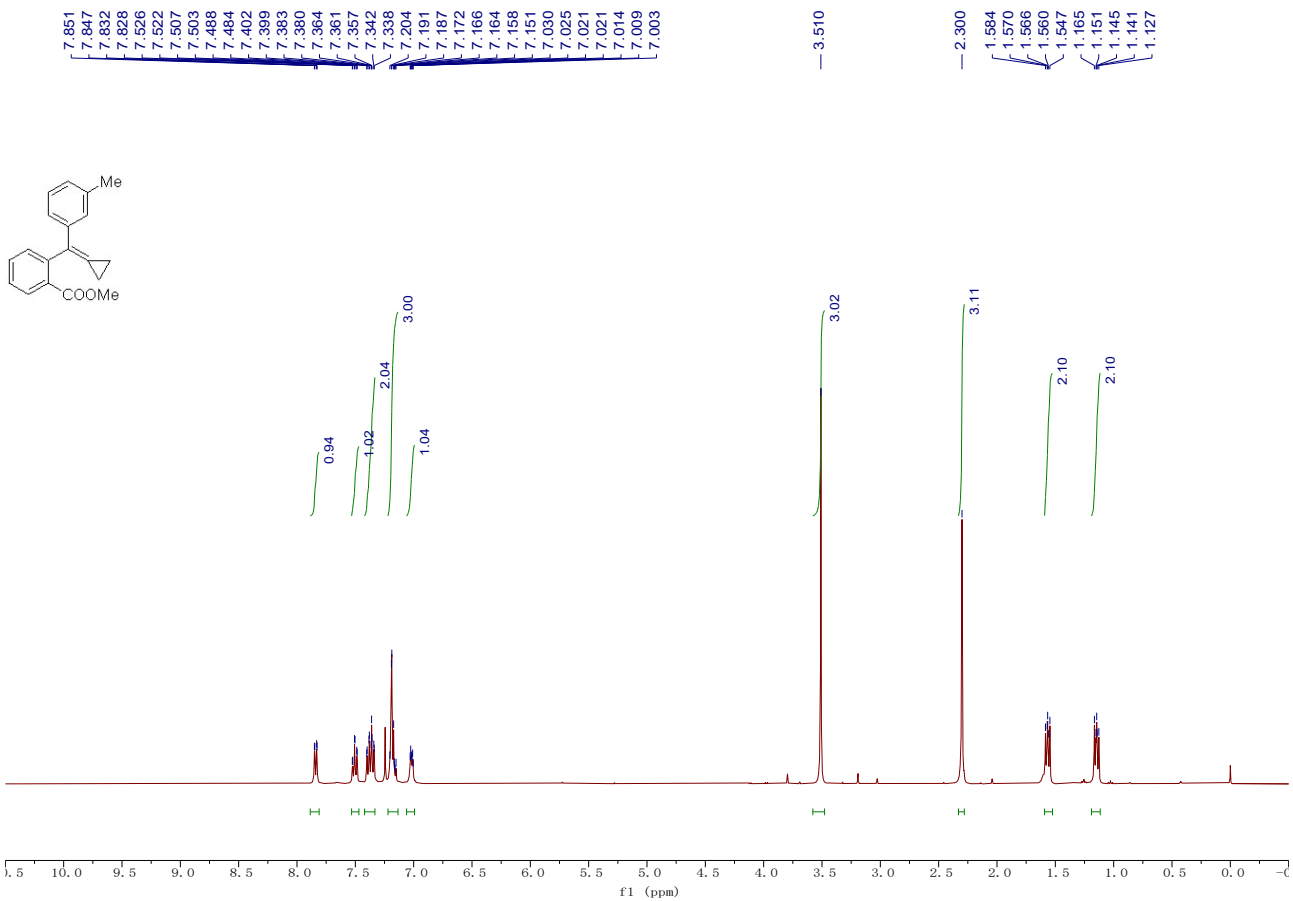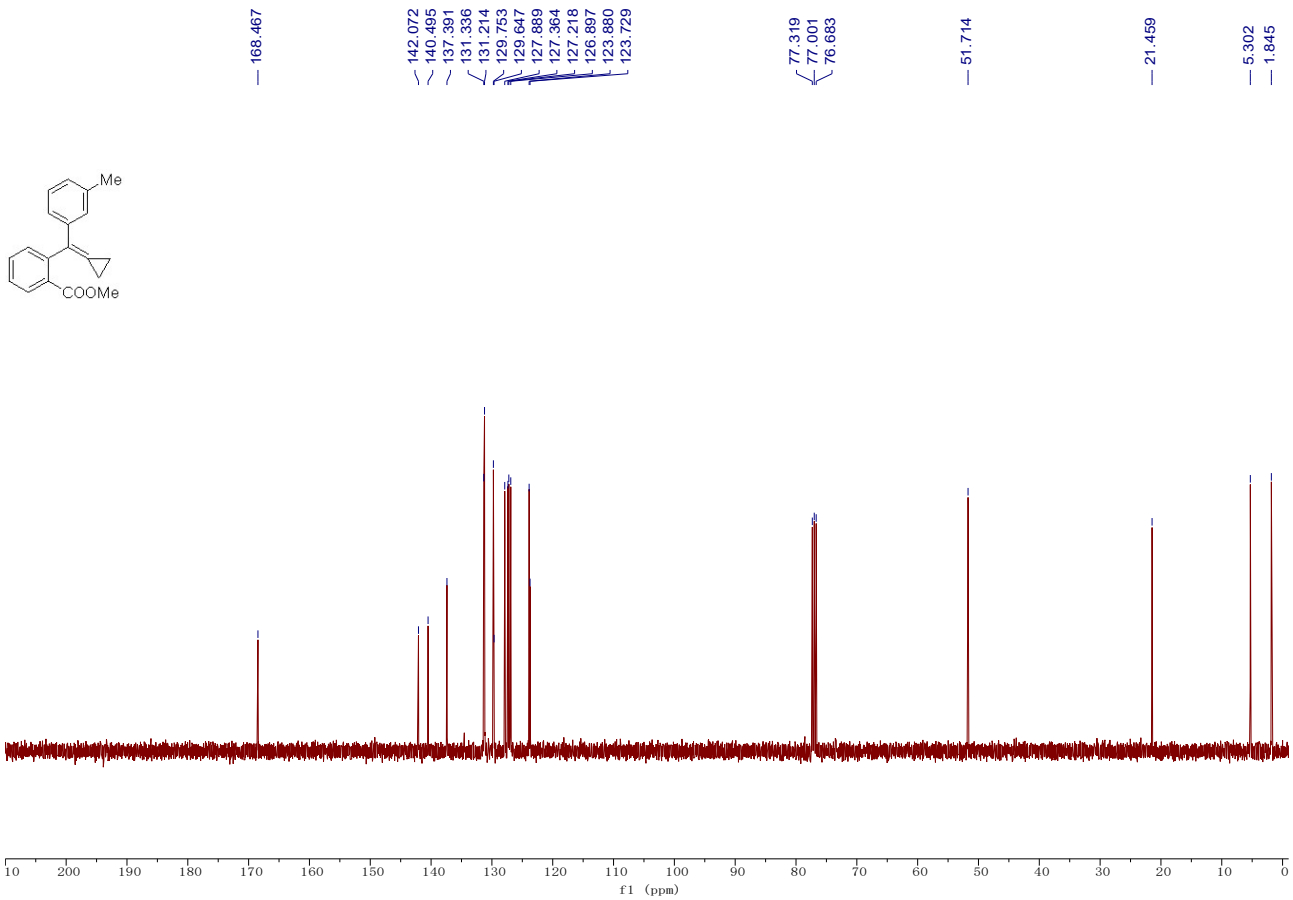



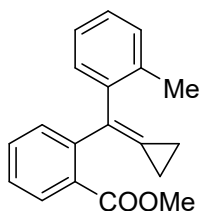

**Compound 1j:** Yield: 0.36 g, 65%; A yellow faint oil; this is a known compound;<sup>2</sup> <sup>1</sup>H NMR (400 MHz, Chloroform-*d*)  $\delta$  7.63 (dd,  $J = 7.7, 1.5$  Hz, 1H), 7.39 (td,  $J = 7.5, 1.5$  Hz, 1H), 7.33 – 7.27 (m, 2H), 7.26 – 7.24 (m, 1H), 7.20 – 7.12 (m, 3H), 3.57 (s, 3H), 2.11 (s, 3H), 1.33 – 1.29 (m, 4H); <sup>13</sup>C NMR (100 MHz, Chloroform-*d*)  $\delta$  169.8, 142.1, 140.4, 136.4, 131.3, 130.6, 130.5, 130.4, 129.9, 129.4, 129.3, 127.9, 127.0, 126.5, 125.2, 51.9, 20.7, 4.3, 4.2.

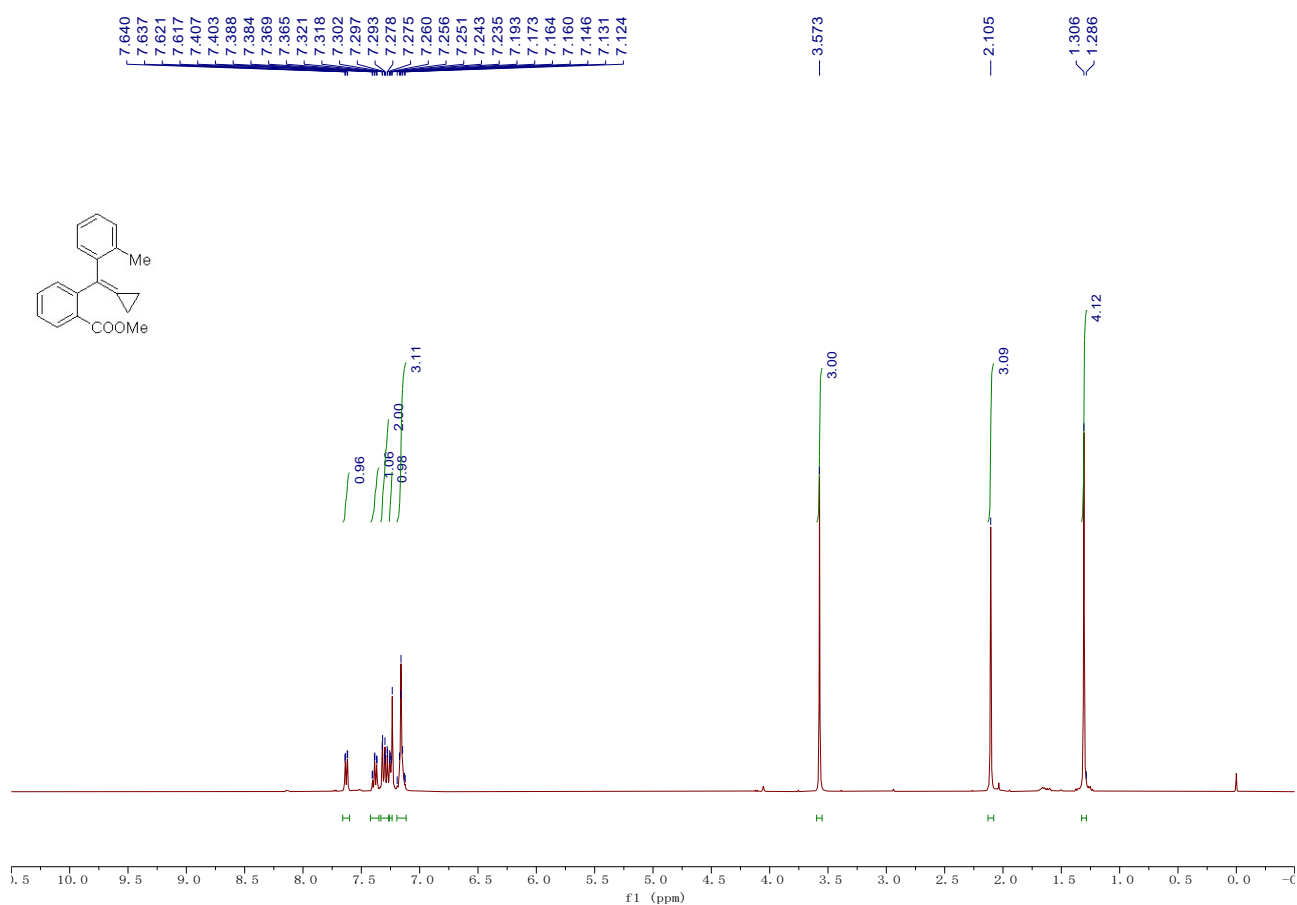

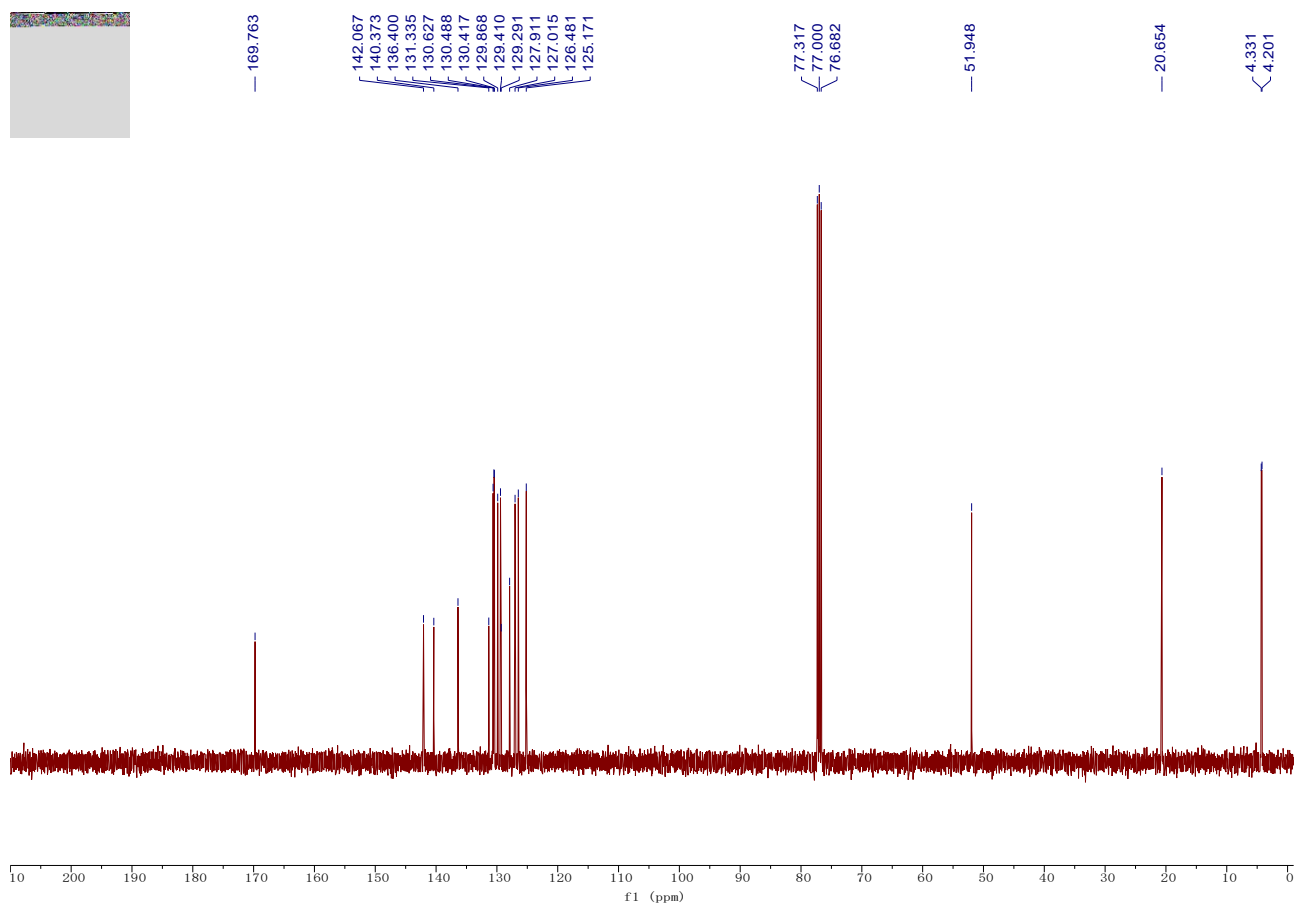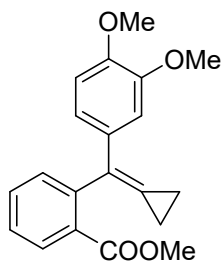

**Compound 1k:** Yield: 0.43 g, 67%; A white solid; this is a known compound;<sup>2</sup> <sup>1</sup>H NMR (400 MHz, Chloroform-*d*)  $\delta$  7.84 (d,  $J = 7.7$  Hz, 1H), 7.55 – 7.47 (m, 1H), 7.43 – 7.33 (m, 2H), 7.11 (s, 1H), 6.84 – 6.73 (m, 2H), 3.86 (s, 3H), 3.83 (s, 3H), 3.54 (s, 3H), 1.61 – 1.52 (m, 2H), 1.20 – 1.12 (m, 2H); <sup>13</sup>C NMR (100 MHz, Chloroform-*d*)  $\delta$  168.5, 148.5, 147.9, 142.0, 133.8, 131.35, 131.31, 131.2, 129.7, 129.3, 127.0, 122.1, 119.3, 110.6, 109.8, 55.75, 55.66, 51.8, 5.2, 1.8.

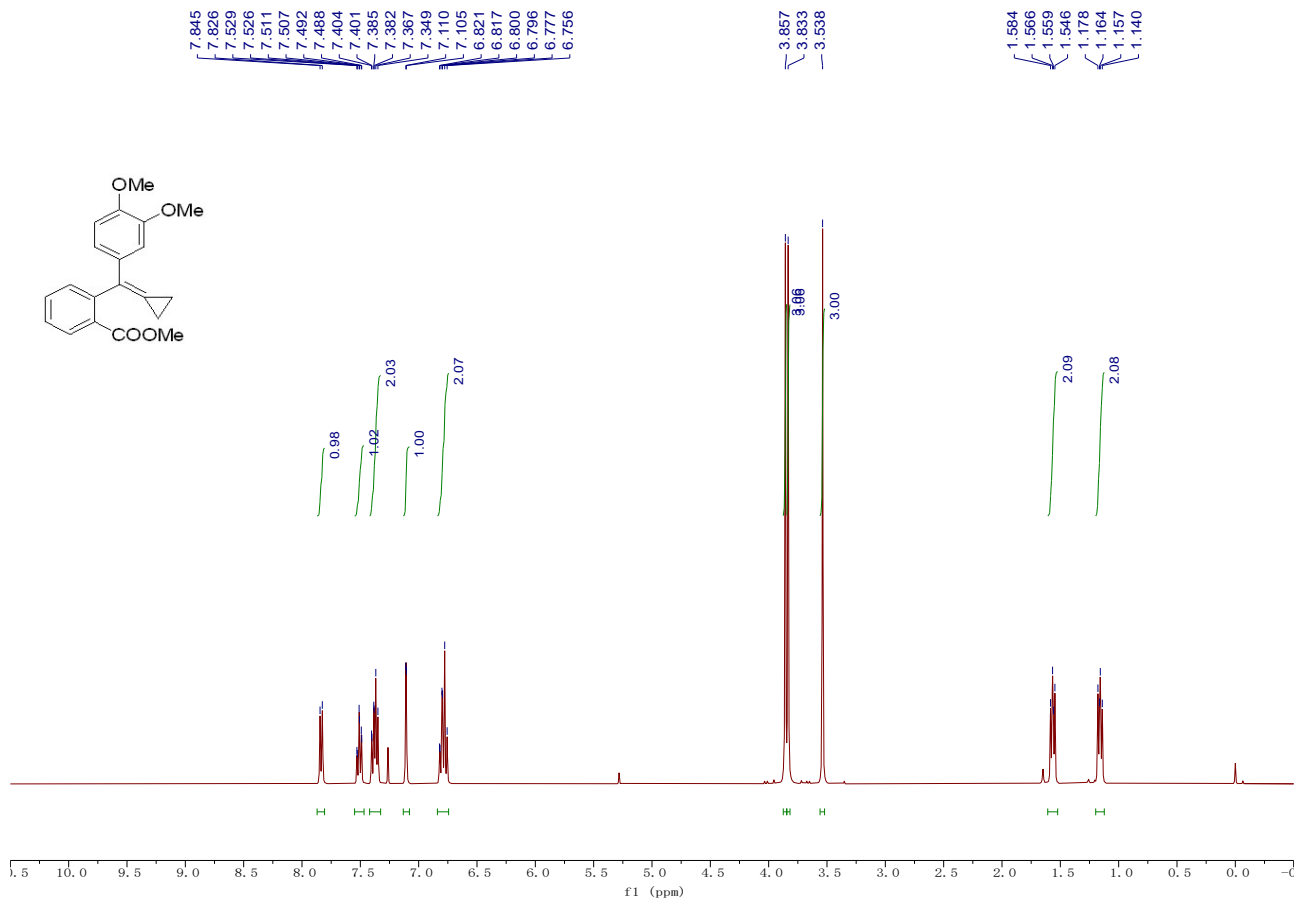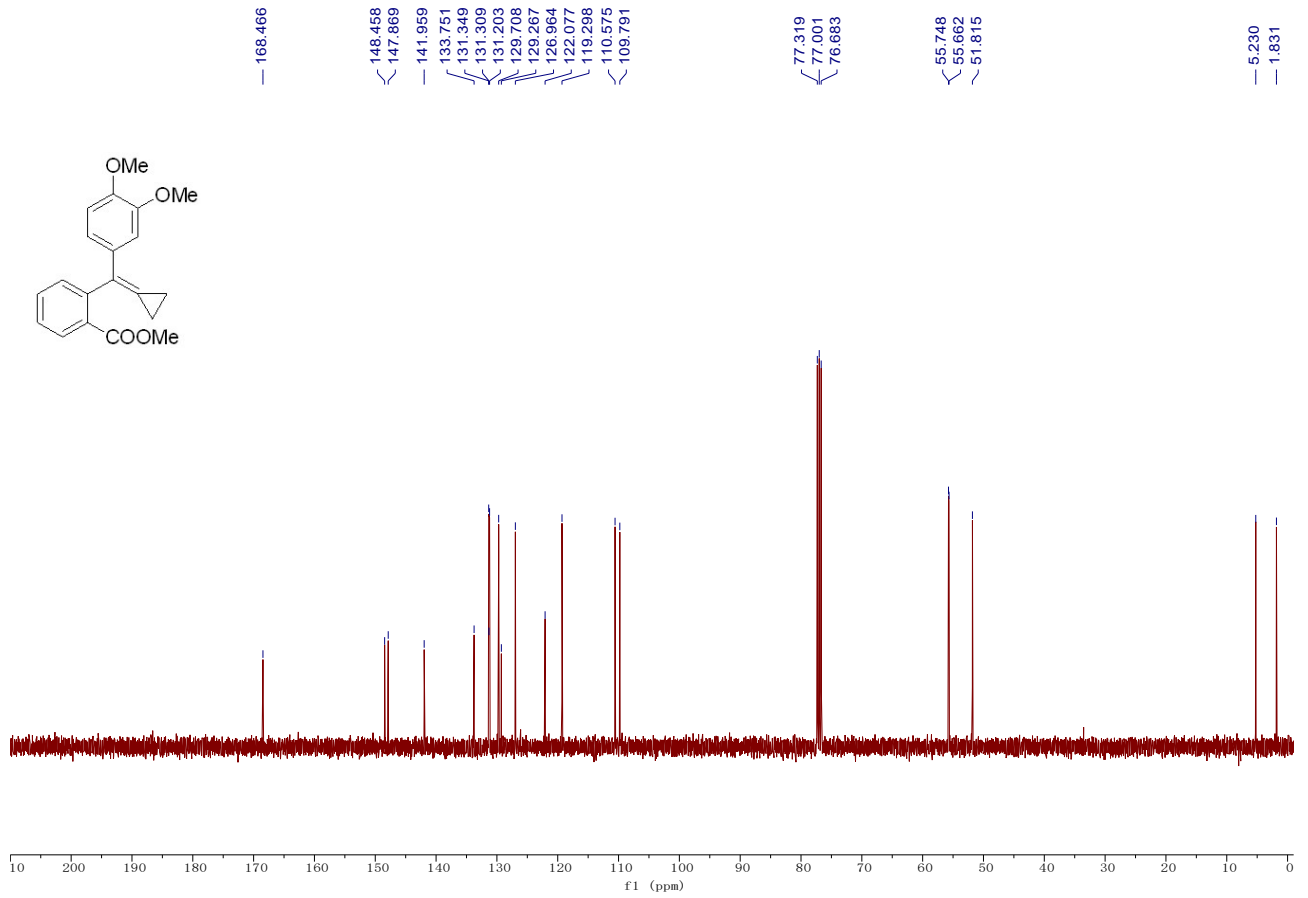

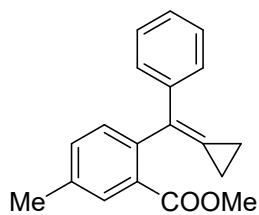

**Compound 11:** Yield: 0.43 g, 77%; A white solid; this is a known compound;<sup>2</sup>  $^1\text{H}$  NMR (400 MHz, Chloroform-*d*)  $\delta$  7.66 (s, 1H), 7.43 – 7.35 (m, 2H), 7.36 – 7.23 (m, 4H), 7.23 – 7.15 (m, 1H), 3.48 (s, 3H), 2.42 (s, 3H), 1.60 – 1.52 (m, 2H), 1.20 – 1.12 (m, 2H);  $^{13}\text{C}$  NMR (100 MHz, Chloroform-*d*)  $\delta$  168.7, 140.8, 139.1, 136.8, 132.2, 131.2, 131.0, 130.4, 129.6, 128.0, 126.6, 126.5, 123.6, 51.7, 21.0, 5.3, 1.9.

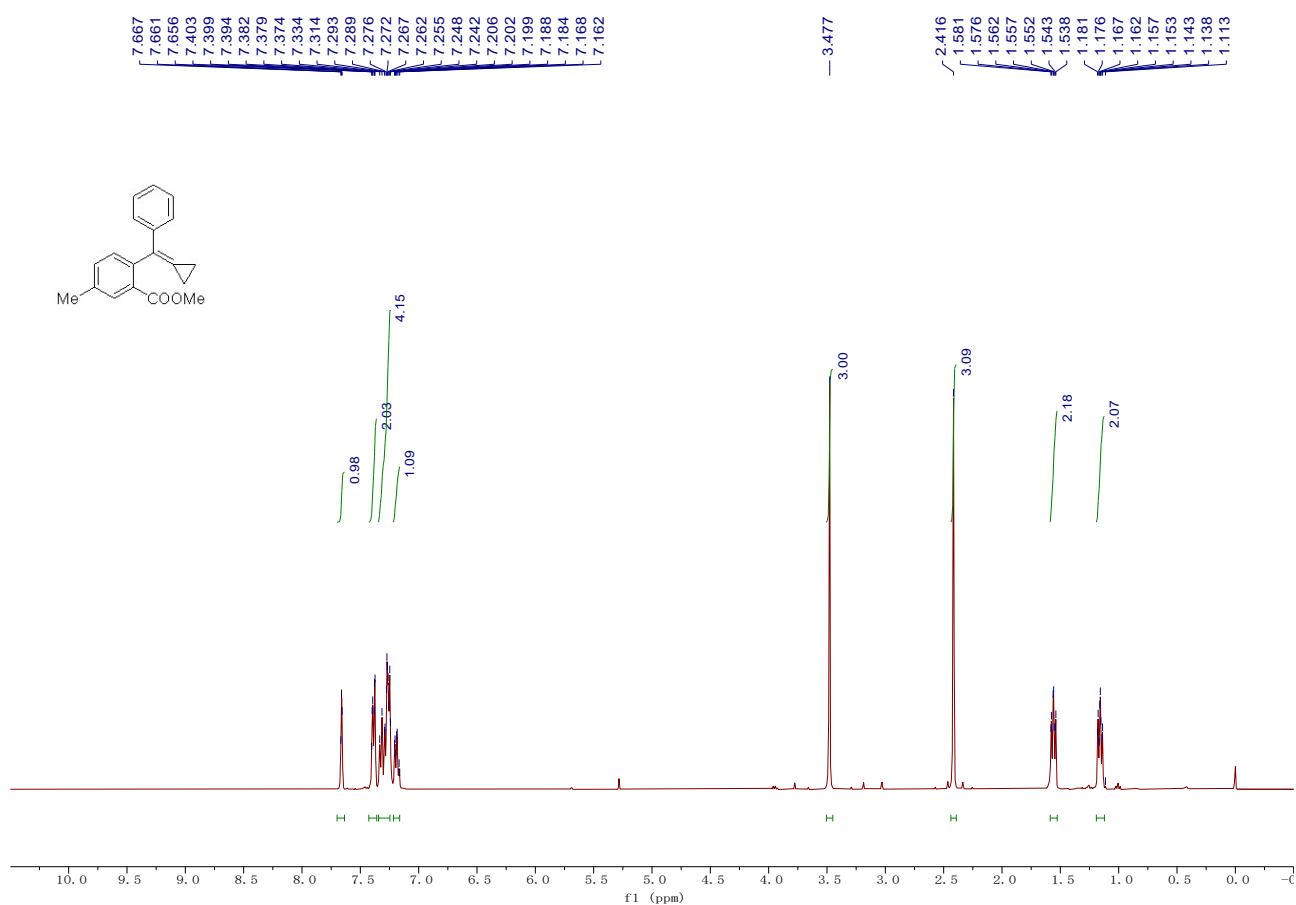

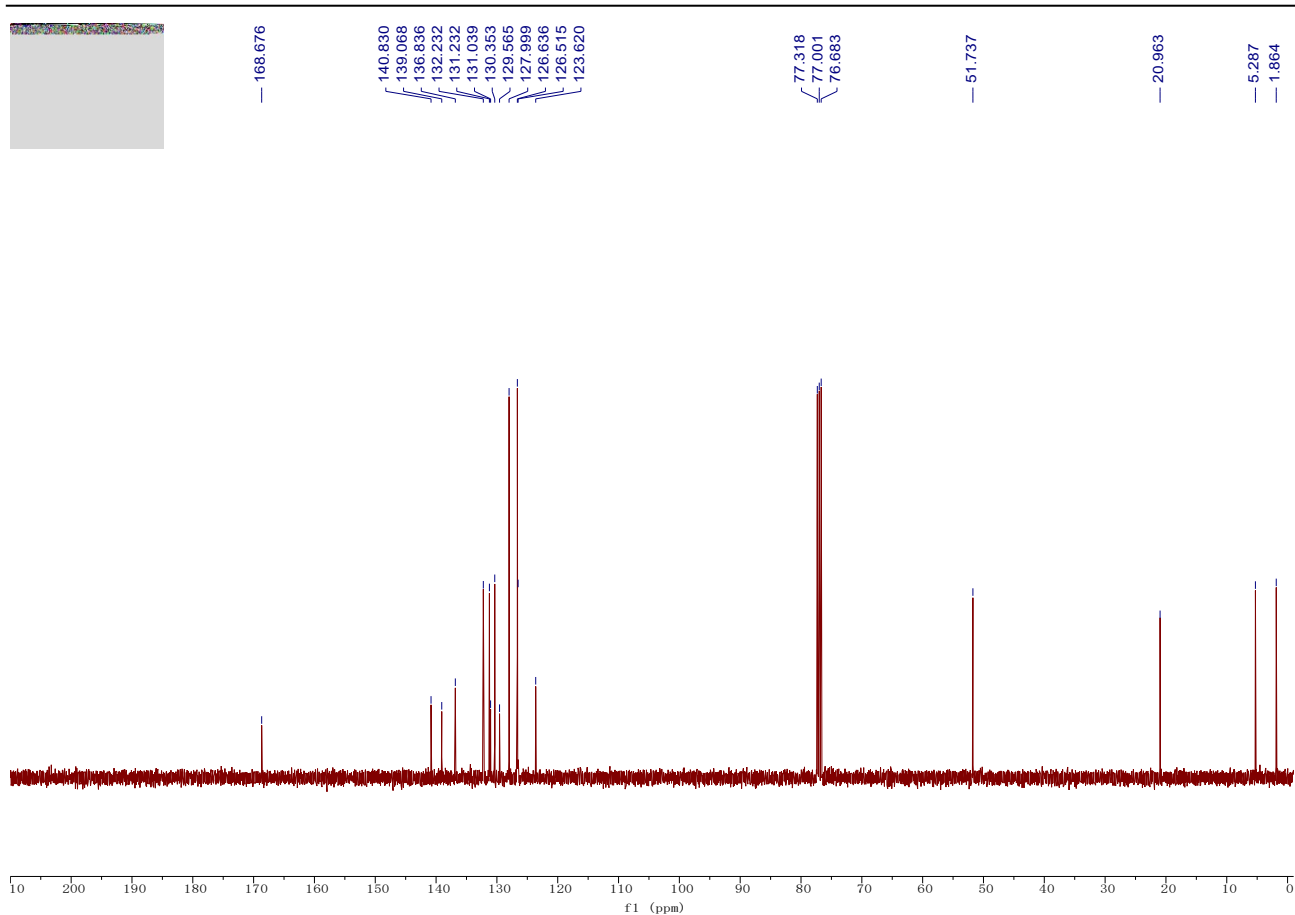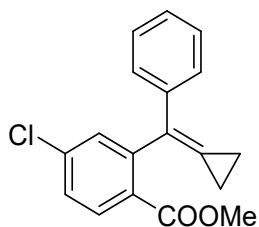

**Compound 1m:** Yield: 0.27 g, 45%; A yellow faint oil; this is a known compound;<sup>2</sup> <sup>1</sup>H NMR (400 MHz, Chloroform-*d*)  $\delta$  7.84 – 7.76 (m, 1H), 7.41 – 7.32 (m, 4H), 7.33 – 7.25 (m, 2H), 7.25 – 7.17 (m, 1H), 3.49 (s, 3H), 1.62 – 1.54 (m, 2H), 1.22 – 1.12 (m, 2H); <sup>13</sup>C NMR (100 MHz, Chloroform-*d*)  $\delta$  167.5, 143.9, 140.0, 137.6, 131.4, 131.3, 129.5, 128.8, 128.1, 127.2, 126.8, 126.5, 124.9, 51.9, 5.4, 1.9.

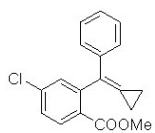

7.816  
7.813  
7.806  
7.796  
7.793  
7.790  
7.376  
7.373  
7.370  
7.358  
7.353  
7.309  
7.306  
7.301  
7.291  
7.288  
7.284  
7.272  
7.268  
7.227  
7.224  
7.221  
7.210  
7.206  
7.200  
7.191  
7.188  
7.185

3.490  
1.601  
1.586  
1.581  
1.576  
1.563  
1.536  
1.201  
1.185  
1.180  
1.176  
1.162  
1.144

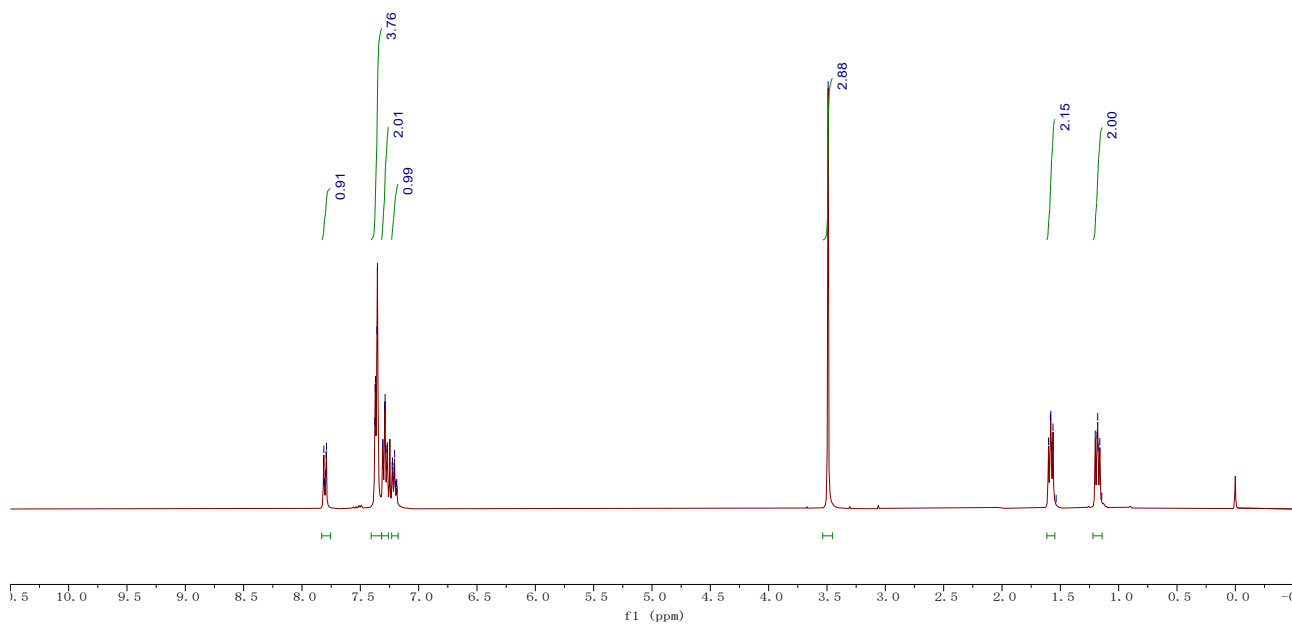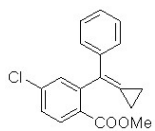

167.470

143.935  
140.008  
137.600  
131.426  
131.269  
129.549  
128.807  
128.141  
127.232  
126.805  
126.508  
124.866

77.318  
77.000  
76.682

51.920

5.383  
1.945

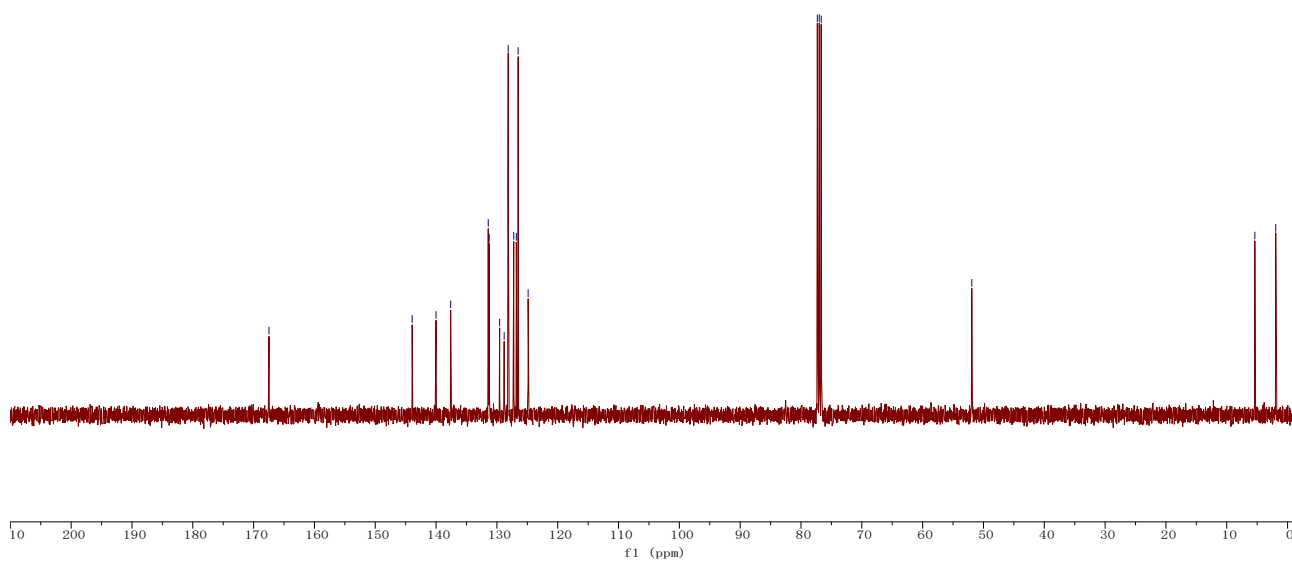

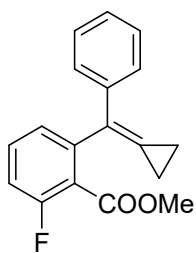

**Compound 1n:** Yield: 0.32 g, 57%; A white solid; this is a known compound;<sup>2</sup> <sup>1</sup>H NMR (400 MHz, Chloroform-*d*)  $\delta$  7.45 – 7.35 (m, 3H), 7.30 (t,  $J = 7.3$  Hz, 2H), 7.26 – 7.17 (m, 1H), 7.18 – 7.12 (m, 1H), 7.08 (t,  $J = 8.9$  Hz, 1H), 3.46 (s, 3H), 1.58 – 1.50 (m, 2H), 1.28 – 1.19 (m, 2H); <sup>13</sup>C NMR (100 MHz, Chloroform-*d*)  $\delta$  165.7, 159.9 (d,  $J = 251.7$  Hz), 142.7 (d,  $J = 2.4$  Hz), 139.7, 131.2 (d,  $J = 9.0$  Hz), 128.1, 128.0, 127.3, 127.0, 126.2, 126.1 (d,  $J = 3.2$  Hz), 121.8 (d,  $J = 15.4$  Hz), 114.5 (d,  $J = 21.8$  Hz), 52.0, 5.1, 2.5; <sup>19</sup>F NMR (376 MHz, Chloroform-*d*)  $\delta$  -114.85 – -114.93 (m).

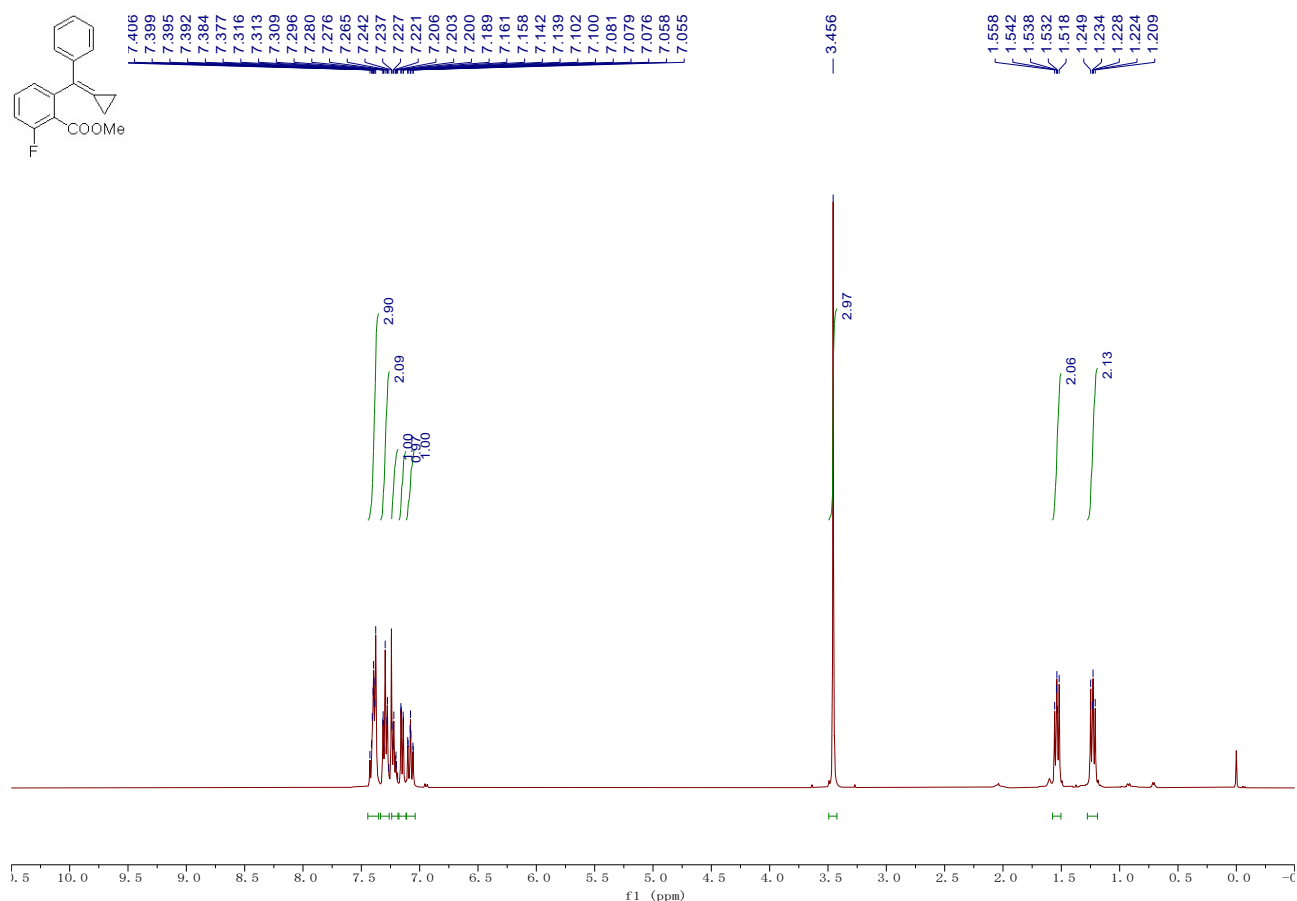

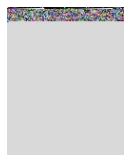

165.721  
161.105  
158.602

142.673  
142.650  
139.676  
131.232  
131.142  
128.061  
128.013  
127.266  
126.983  
126.225  
126.148  
126.116  
121.850  
121.696  
114.629  
114.412

77.317  
76.999  
76.681

52.047

5.125  
2.458

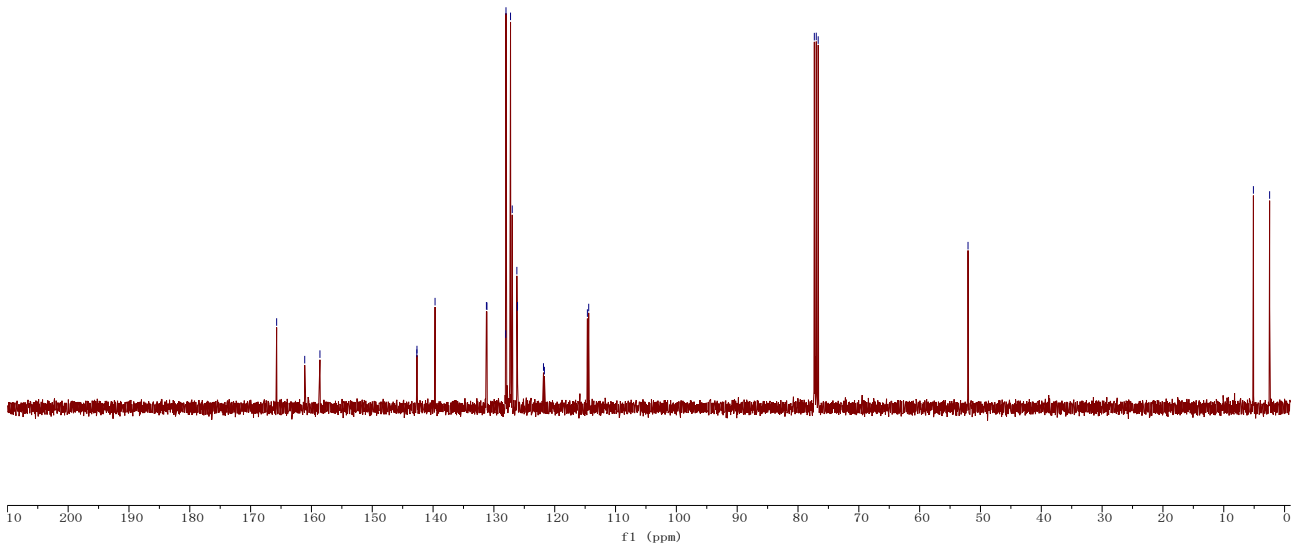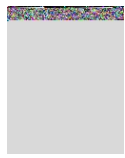

-114.870  
-114.885  
-114.895  
-114.910

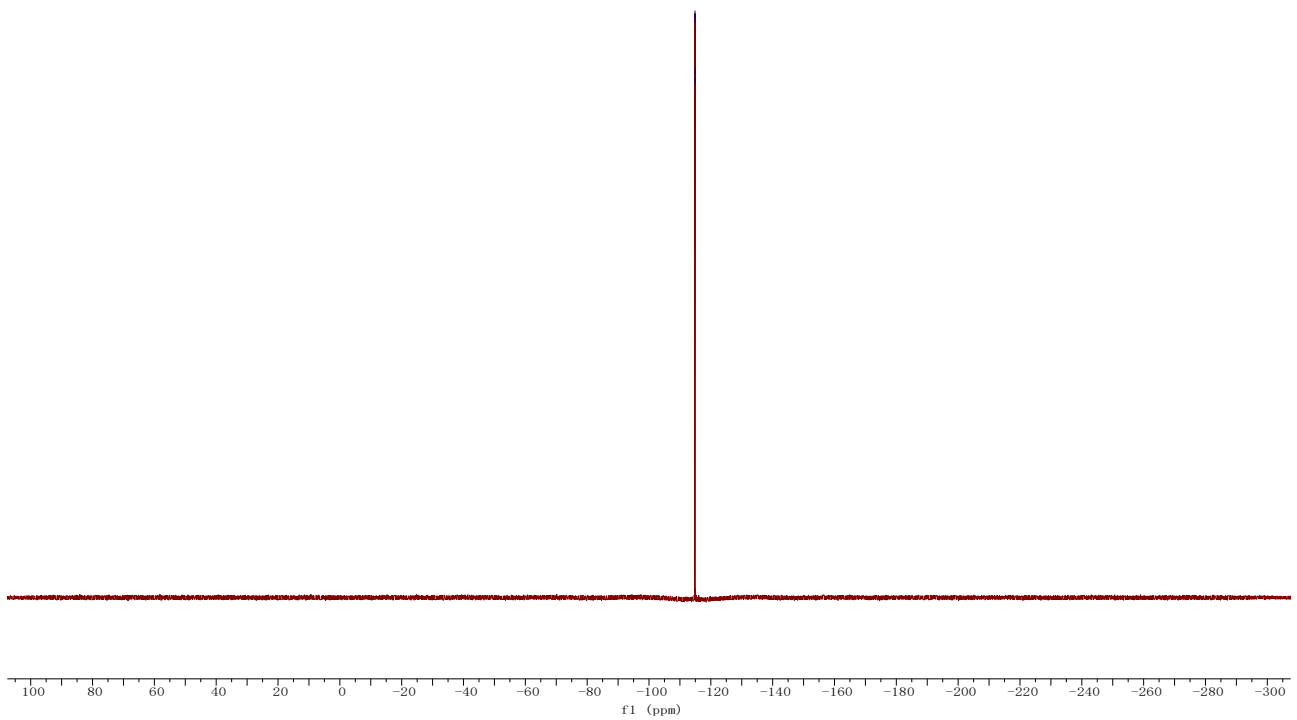



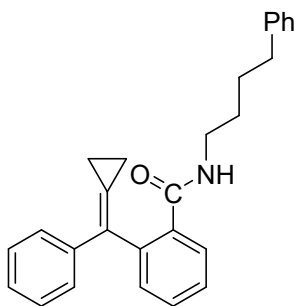

**Compound 6a:** Yield: 0.46 g, 61%; A yellow faint oil; Isolated by column chromatography on silica gel (PE/EtOAc = 10:1,  $R_f$  = 0.4);  $^1\text{H}$  NMR (400 MHz, Chloroform- $d$ )  $\delta$  7.80 (dd,  $J$  = 7.4, 1.8 Hz, 1H), 7.50 – 7.36 (m, 4H), 7.33 – 7.23 (m, 5H), 7.25 – 7.13 (m, 2H), 7.11 – 7.04 (m, 2H), 5.91 – 5.73 (m, 1H), 3.14 – 3.03 (m, 2H), 2.48 (t,  $J$  = 7.6 Hz, 2H), 1.59 – 1.50 (m, 2H), 1.44 – 1.32 (m, 2H), 1.24 – 1.11 (m, 4H);  $^{13}\text{C}$  NMR (100 MHz, Chloroform- $d$ )  $\delta$  168.7, 141.9, 139.4, 138.5, 135.9, 130.8, 130.2, 129.1, 128.8, 128.5, 128.3, 128.2, 127.6, 127.3, 126.4, 125.9, 125.7, 39.5, 35.4, 28.7, 28.4, 5.8, 1.8; IR (neat):  $\nu$  3324, 2927, 2854, 1632, 1454, 697  $\text{cm}^{-1}$ ; HRMS (ESI+) Calcd. for  $\text{C}_{27}\text{H}_{28}\text{NO}$   $[\text{M}+\text{H}]^+$ : 382.2165, found: 382.2173.

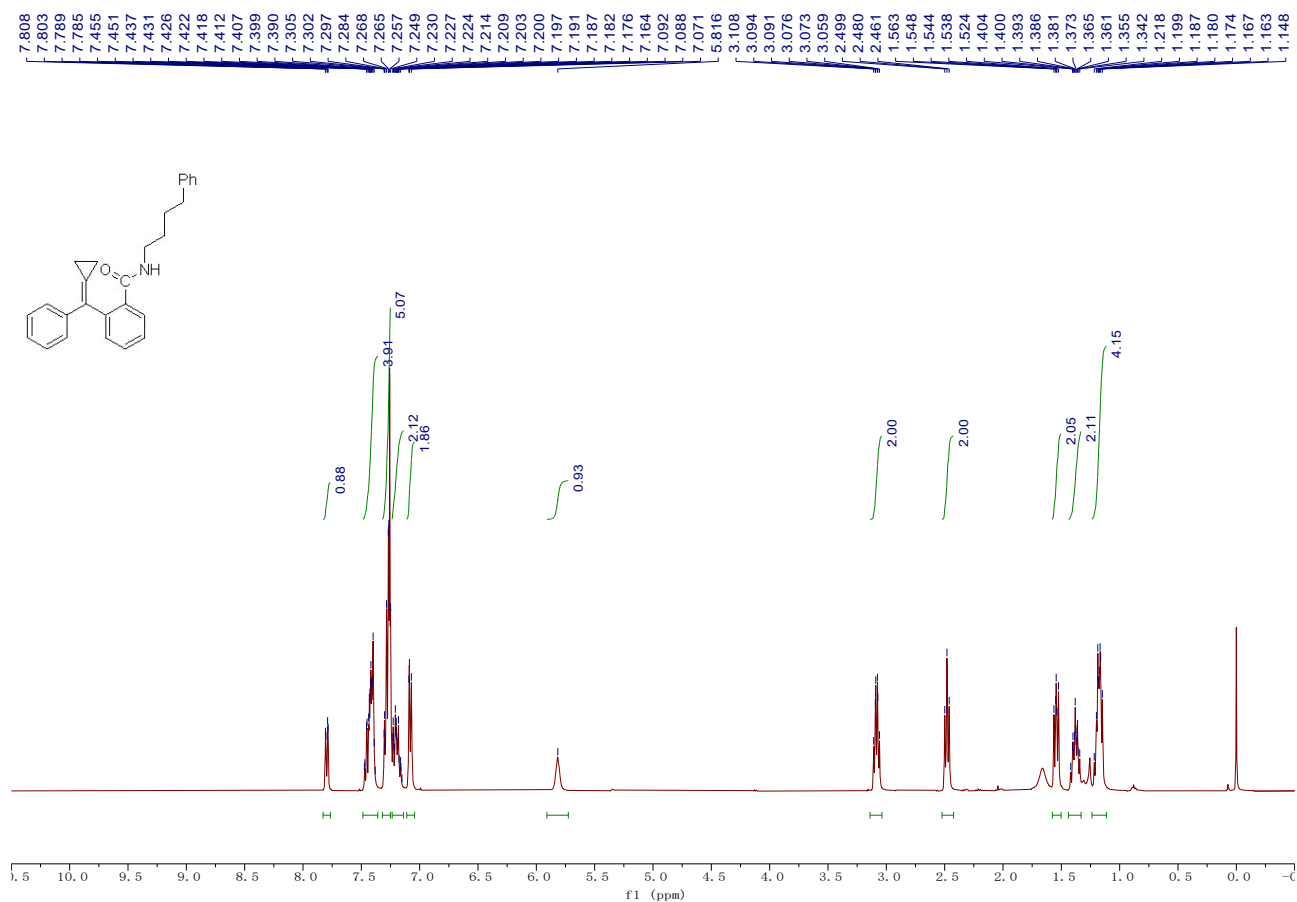

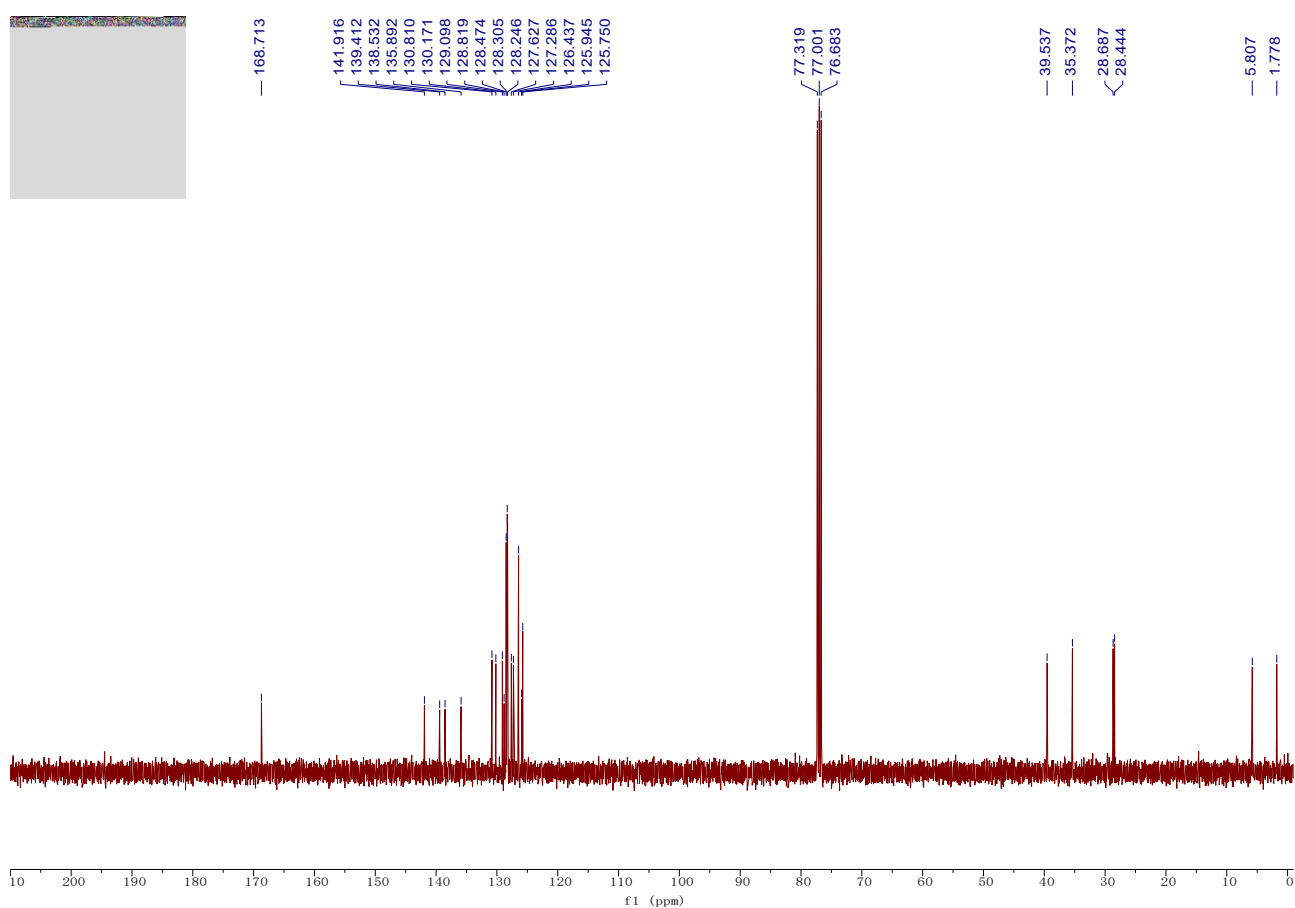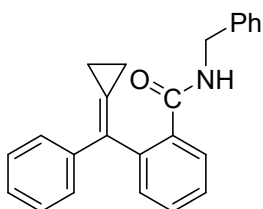

**Compound 6b:** Yield: 0.54 g, 80%; A white solid; Mp: 153 - 155 °C; Isolated by column chromatography on silica gel (PE/EtOAc = 10:1,  $R_f$  = 0.4);  $^1\text{H}$  NMR (400 MHz, Chloroform-*d*)  $\delta$  7.91 – 7.82 (m, 1H), 7.51 – 7.38 (m, 2H), 7.38 – 7.31 (m, 2H), 7.32 – 7.17 (m, 7H), 7.01 – 6.92 (m, 2H), 6.24 – 6.07 (m, 1H), 4.24 (d,  $J$  = 5.5 Hz, 2H), 1.42 – 1.33 (m, 2H), 1.11 – 1.02 (m, 2H);  $^{13}\text{C}$  NMR (100 MHz, Chloroform-*d*)  $\delta$  168.4, 139.2, 138.7, 137.7, 135.4, 130.8, 130.3, 129.2, 128.7, 128.5, 128.4, 127.7, 127.6, 127.31, 127.26, 126.5, 126.0, 44.0, 5.6, 1.6; IR (neat):  $\nu$  3274, 1631, 1541, 1494, 1305, 751, 704, 693  $\text{cm}^{-1}$ ; HRMS (ESI+) Calcd. for  $\text{C}_{24}\text{H}_{21}\text{NONa}$   $[\text{M}+\text{Na}]^+$ : 362.1515, found: 362.1518.

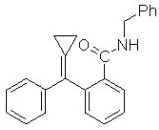

7.873  
7.869  
7.855  
7.850  
7.511  
7.483  
7.479  
7.465  
7.460  
7.447  
7.442  
7.437  
7.423  
7.419  
7.405  
7.401  
7.357  
7.353  
7.336  
7.332  
7.302  
7.298  
7.293  
7.282  
7.276  
7.262  
7.258  
7.252  
7.243  
7.239  
7.229  
7.223  
7.218  
7.210  
7.206  
7.196  
7.183  
6.989  
6.981  
6.976  
6.966  
6.958  
6.148  
4.249  
4.235  
1.396  
1.381  
1.377  
1.370  
1.357  
1.084  
1.070  
1.064  
1.060  
1.045

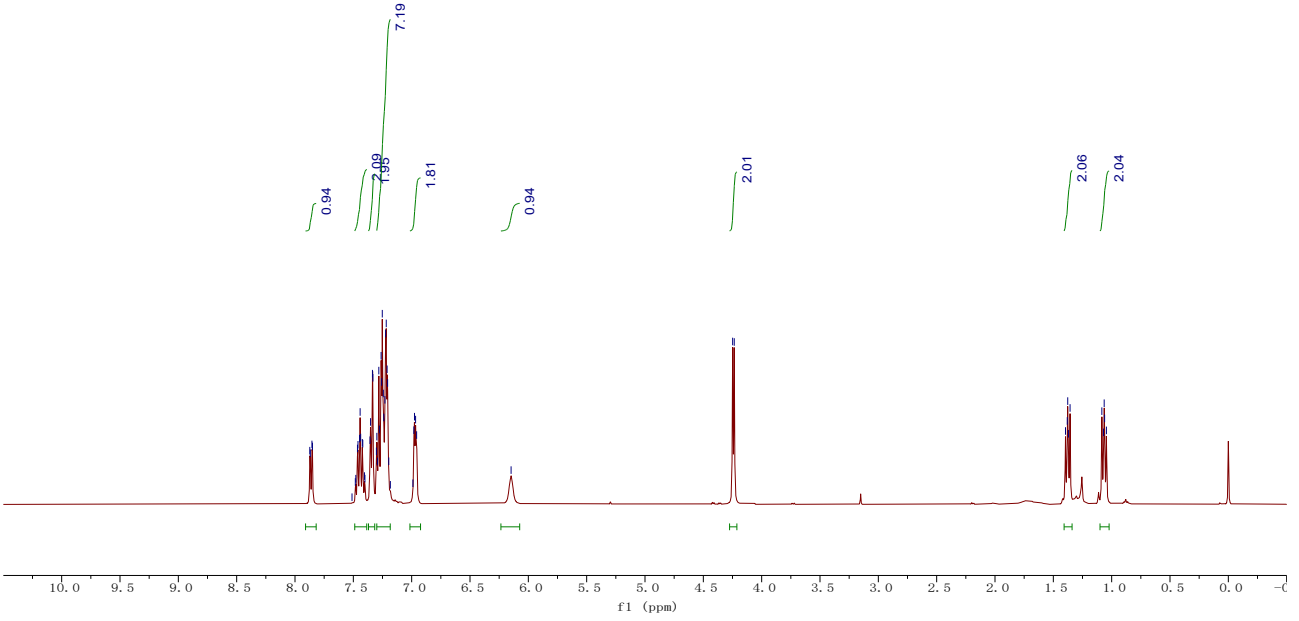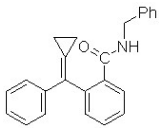

168.383  
139.235  
138.730  
137.681  
135.385  
130.850  
130.349  
129.215  
128.711  
128.542  
128.444  
127.624  
127.309  
127.256  
126.468  
125.992  
77.318  
77.000  
76.683  
44.026  
5.636  
1.643

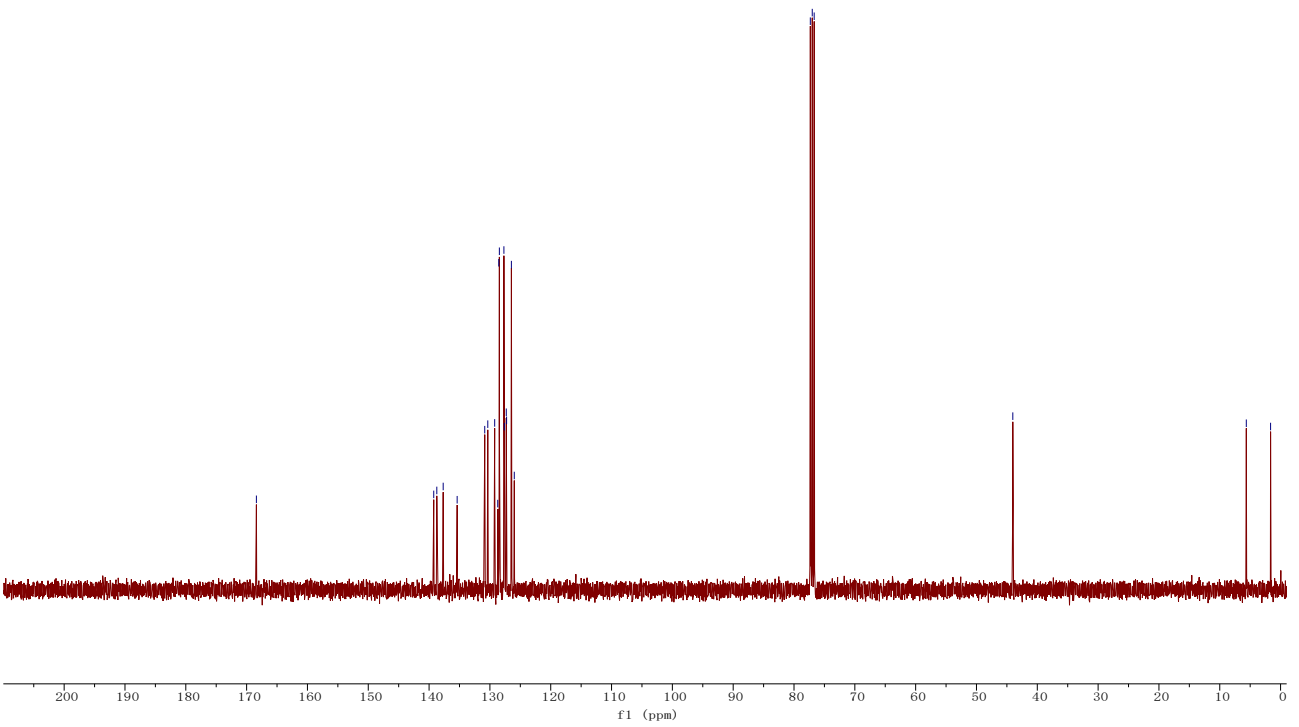

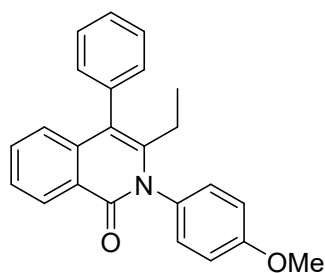

**Compound 3a:** Yield: 67.5 mg, 95%; A white solid; Mp: 182 - 184 °C; Isolated by column chromatography on silica gel (PE/EtOAc = 4:1,  $R_f = 0.4$ );  $^1\text{H NMR}$  (400 MHz, Chloroform-*d*)  $\delta$  8.45 (dd,  $J = 8.0, 1.5$  Hz, 1H), 7.52 – 7.46 (m, 3H), 7.45 – 7.38 (m, 2H), 7.36 – 7.29 (m, 2H), 7.27 – 7.23 (m, 2H), 7.07 – 7.00 (m, 2H), 6.99 – 6.94 (m, 1H), 3.86 (s, 3H), 2.25 (q,  $J = 7.4$  Hz, 2H), 0.78 (t,  $J = 7.4$  Hz, 3H);  $^{13}\text{C NMR}$  (100 MHz, Chloroform-*d*)  $\delta$  163.5, 159.3, 142.7, 138.1, 137.2, 132.2, 131.6, 131.0, 130.0, 128.7, 128.0, 127.5, 126.0, 125.0, 124.6, 117.2, 114.5, 55.4, 24.3, 13.8; IR (neat):  $\nu$  1657, 1586, 1507, 1335, 1243, 815, 702  $\text{cm}^{-1}$ ; HRMS (ESI+) Calcd. for  $\text{C}_{24}\text{H}_{22}\text{NO}_2$   $[\text{M}+\text{H}]^+$ : 356.1645, found: 356.1651.

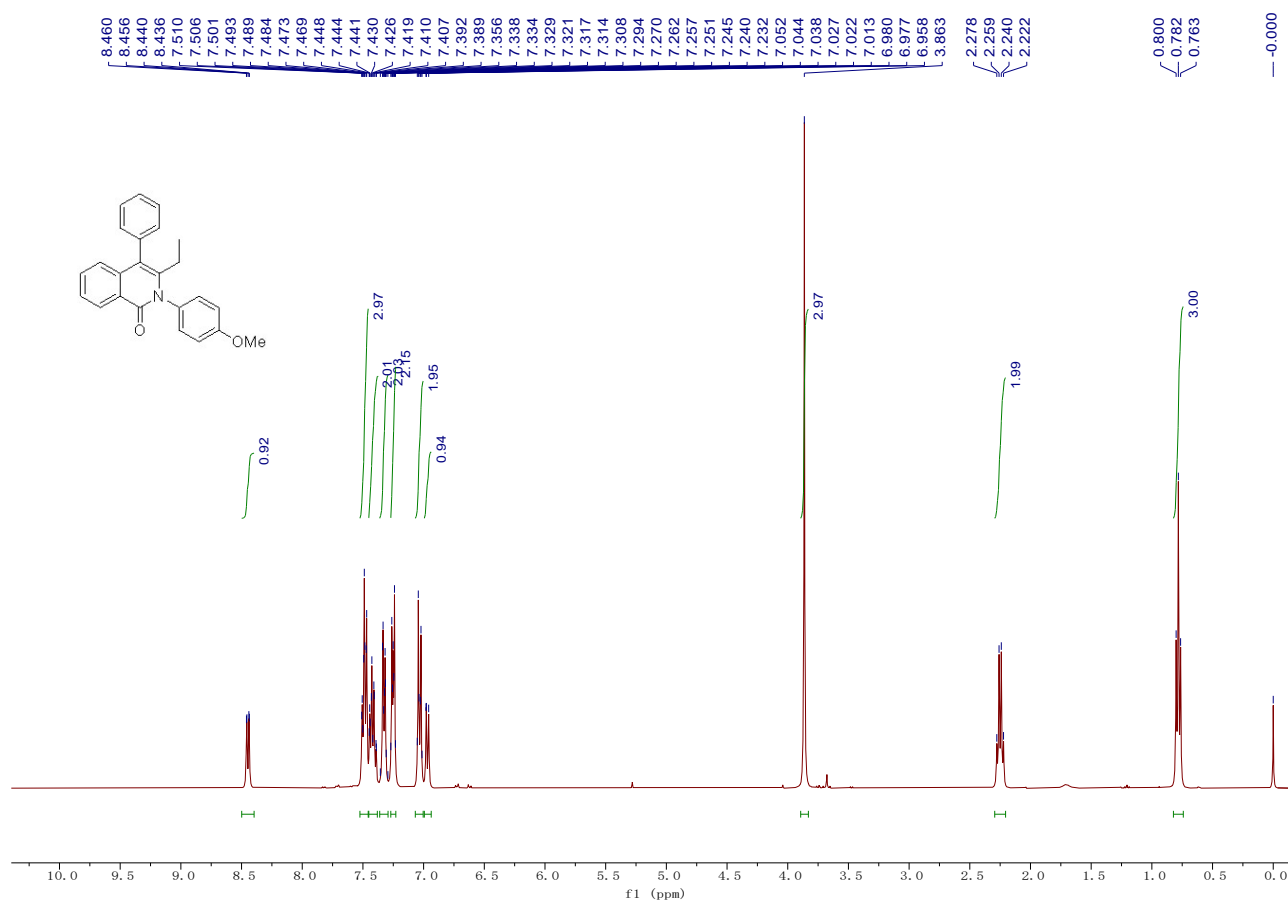

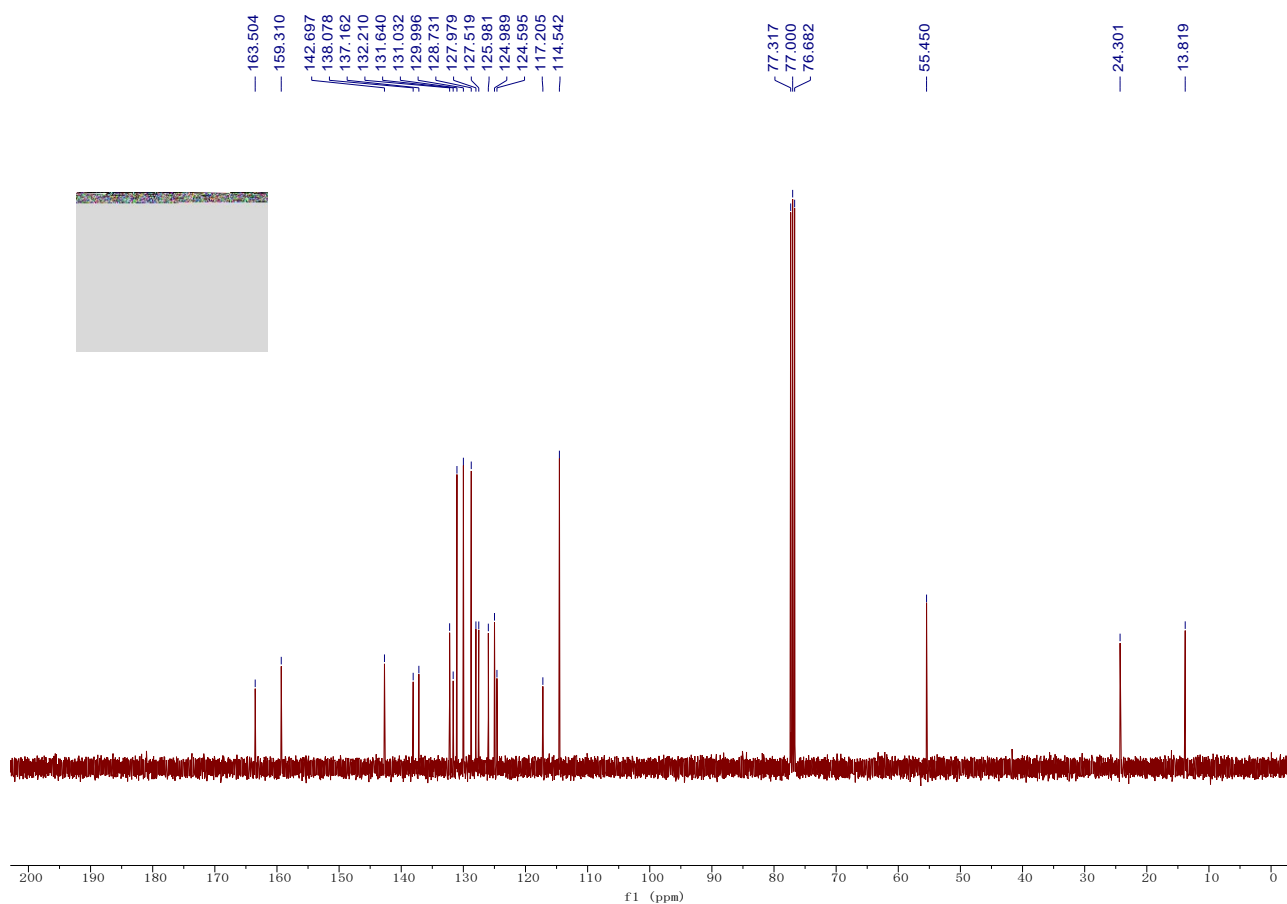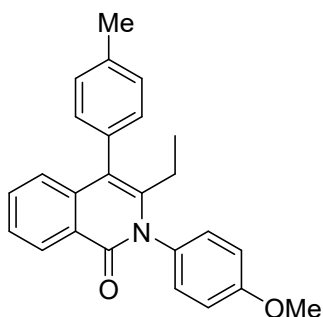

**Compound 3b:** Yield: 64.2 mg, 87%; A white solid; Mp: 193 - 195 °C; Isolated by column chromatography on silica gel (PE/EtOAc = 4:1,  $R_f$  = 0.4);  $^1\text{H}$  NMR (400 MHz, Chloroform-*d*)  $\delta$  8.44 (dd,  $J$  = 8.0, 1.5 Hz, 1H), 7.52 – 7.46 (m, 1H), 7.41 (td,  $J$  = 7.6, 7.0, 1.3 Hz, 1H), 7.31 – 7.19 (m, 6H), 7.06 – 6.96 (m, 3H), 3.86 (s, 3H), 2.44 (s, 3H), 2.25 (q,  $J$  = 7.4 Hz, 2H), 0.78 (t,  $J$  = 7.4 Hz, 3H);  $^{13}\text{C}$  NMR (100 MHz, Chloroform-*d*)  $\delta$  163.5, 159.3, 142.7, 138.2, 137.1, 134.0, 132.2, 131.7, 130.8, 130.0, 129.4, 127.9, 125.9, 125.0, 124.5, 117.1, 114.5, 55.4, 24.3, 21.3, 13.9; IR (neat):  $\nu$  1651, 1593, 1507, 1246, 1033, 814, 779, 707  $\text{cm}^{-1}$ ; HRMS (ESI+) Calcd. for  $\text{C}_{25}\text{H}_{24}\text{NO}_2$   $[\text{M}+\text{H}]^+$ : 370.1802, found: 370.1802.

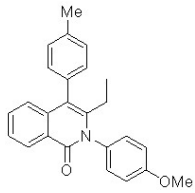

- 8.452
- 8.449
- 8.432
- 8.429
- 7.510
- 7.506
- 7.492
- 7.489
- 7.486
- 7.472
- 7.468
- 7.426
- 7.423
- 7.406
- 7.403
- 7.389
- 7.385
- 7.303
- 7.284
- 7.253
- 7.238
- 7.215
- 7.200
- 7.195
- 7.041
- 7.024
- 7.020
- 7.010
- 6.989

3.862

- 2.444
- 2.281
- 2.263
- 2.244
- 2.226

- 0.801
- 0.783
- 0.764

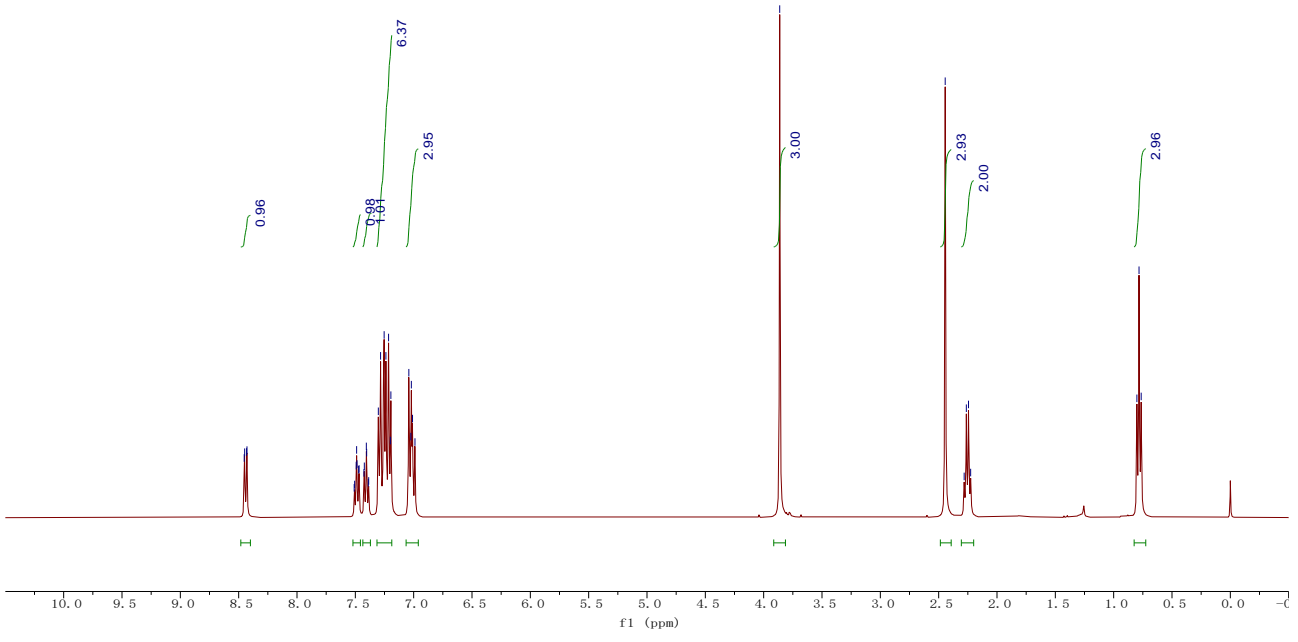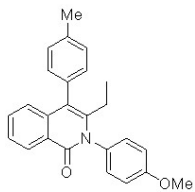

- 163.518
- 159.251
- 142.711
- 138.234
- 137.138
- 134.012
- 132.160
- 131.655
- 130.824
- 129.964
- 129.423
- 127.919
- 125.913
- 125.048
- 124.525
- 117.142
- 114.507

- 77.318
- 77.000
- 76.682

55.440

- 24.296
- 21.250
- 13.874

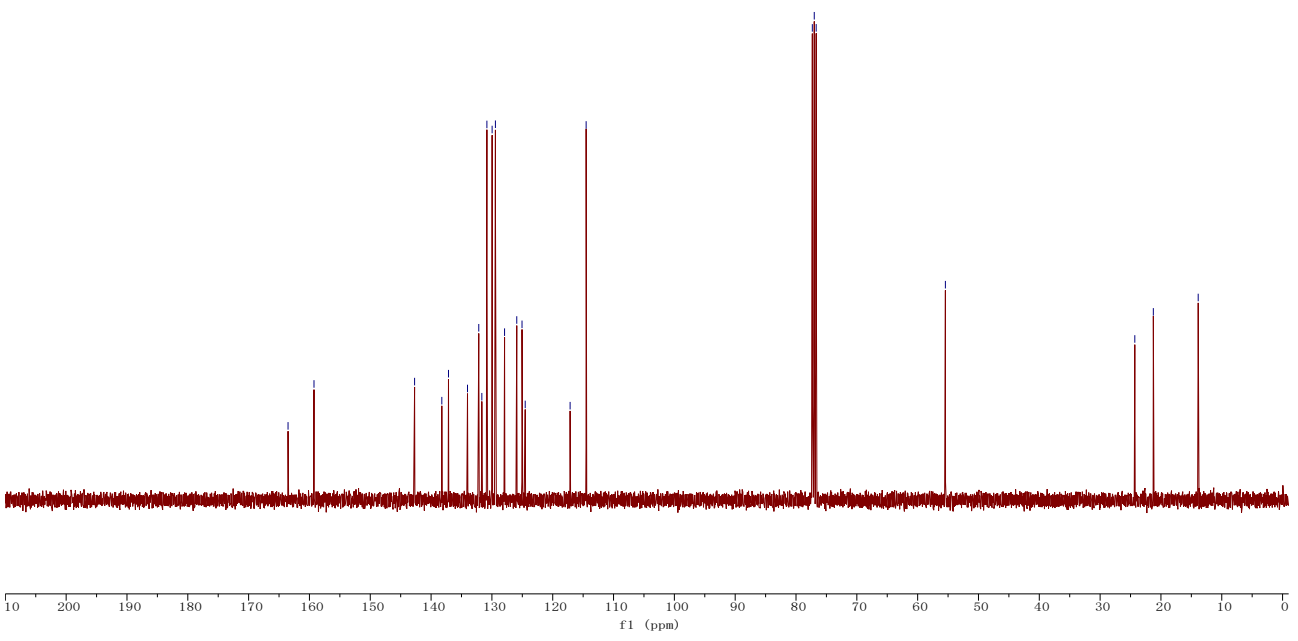

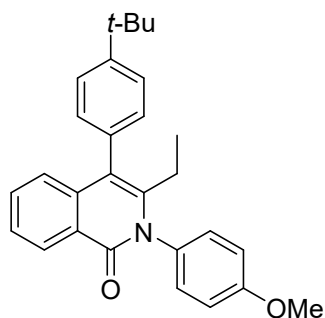

**Compound 3c:** Yield: 73.2 mg, 89%; A white solid; Mp: > 200 °C; Isolated by column chromatography on silica gel (PE/EtOAc = 4:1,  $R_f$  = 0.4);  $^1\text{H}$  NMR (400 MHz, Chloroform-*d*)  $\delta$  8.44 (dd,  $J$  = 8.0, 1.5 Hz, 1H), 7.52 – 7.44 (m, 3H), 7.43 – 7.36 (m, 1H), 7.27 – 7.21 (m, 4H), 7.07 – 6.96 (m, 3H), 3.86 (s, 3H), 2.26 (q,  $J$  = 7.3 Hz, 2H), 1.40 (s, 9H), 0.79 (t,  $J$  = 7.3 Hz, 3H);  $^{13}\text{C}$  NMR (100 MHz, Chloroform-*d*)  $\delta$  163.5, 159.2, 150.3, 142.7, 138.3, 133.9, 132.1, 131.7, 130.5, 130.0, 127.9, 125.9, 125.5, 125.1, 124.5, 117.2, 114.5, 55.4, 34.6, 31.4, 24.3, 13.9; IR (neat):  $\nu$  1654, 1508, 1332, 1248, 1026, 827, 780, 707  $\text{cm}^{-1}$ ; HRMS (ESI+) Calcd. for  $\text{C}_{28}\text{H}_{30}\text{NO}_2$   $[\text{M}+\text{H}]^+$ : 412.2271, found: 412.2269.

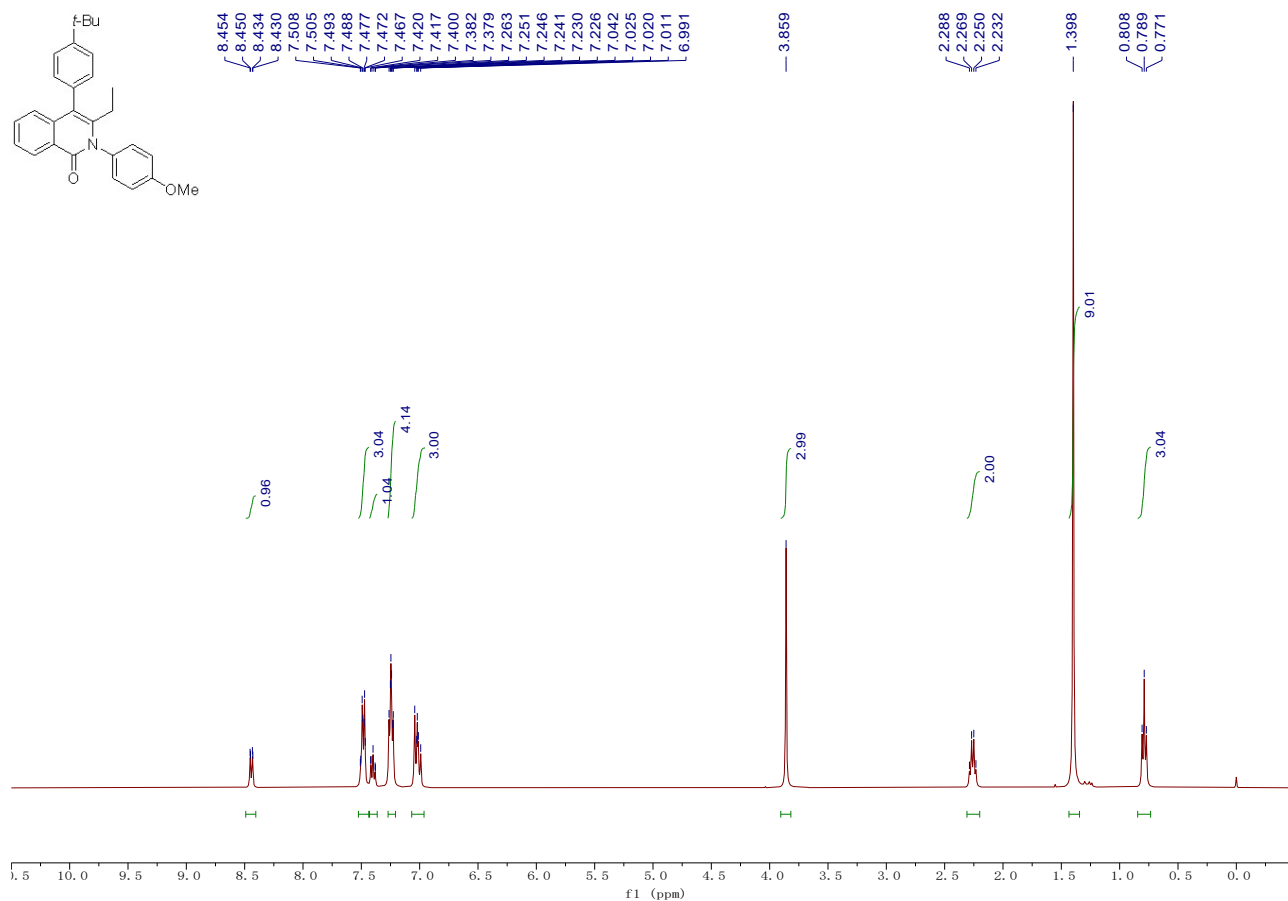

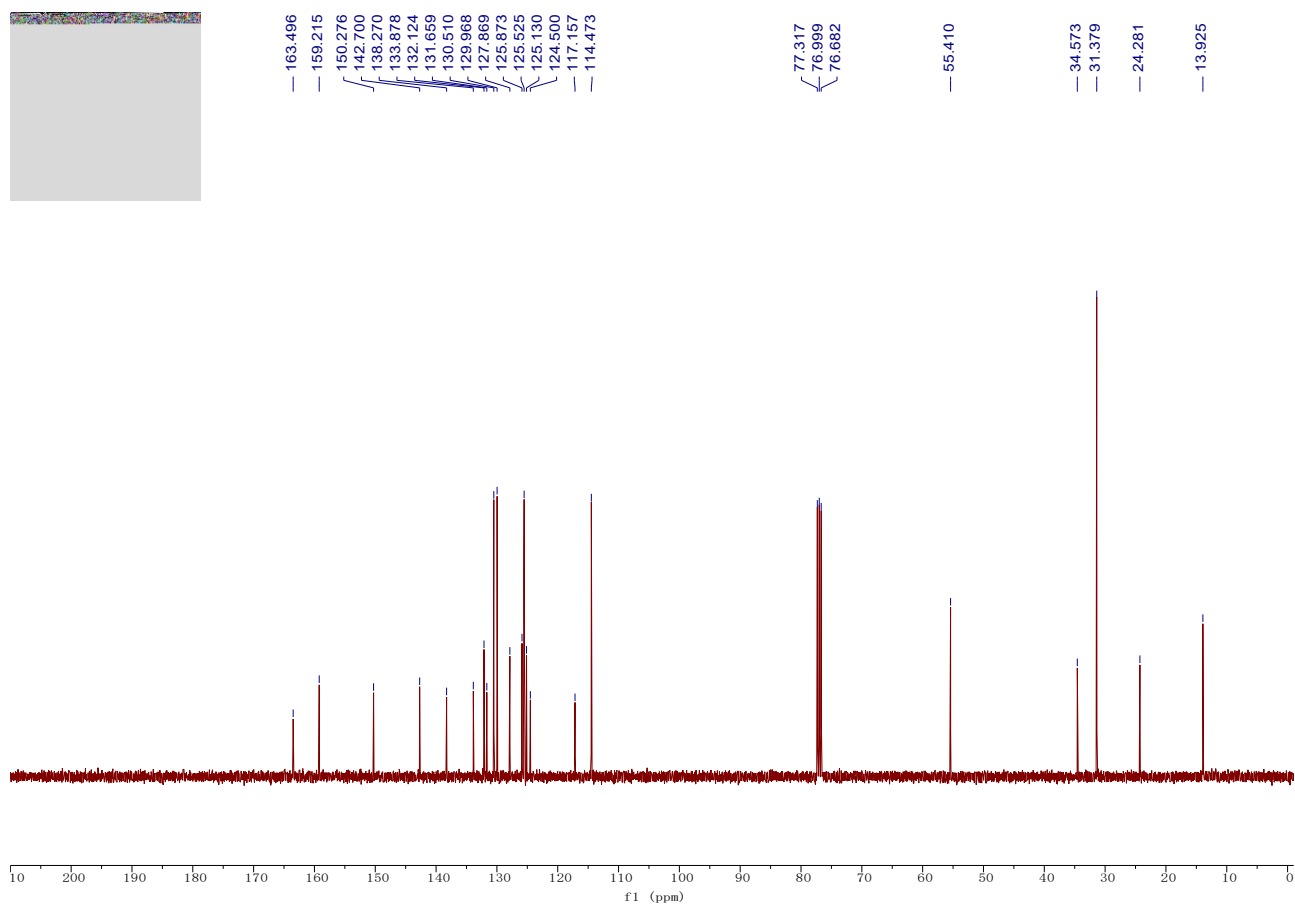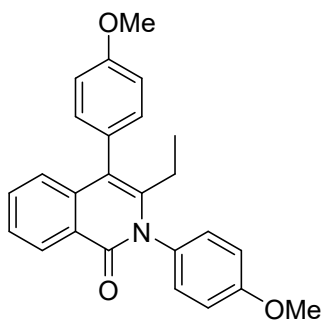

**Compound 3d:** Yield: 50.1 mg, 65%; A white solid; Mp: > 200 °C; Isolated by column chromatography on silica gel (PE/EtOAc = 4:1,  $R_f$  = 0.3);  $^1\text{H}$  NMR (400 MHz, Chloroform-*d*)  $\delta$  8.44 (d,  $J$  = 7.8 Hz, 1H), 7.55 – 7.46 (m, 1H), 7.45 – 7.37 (m, 1H), 7.28 – 7.20 (m, 4H), 7.08 – 6.97 (m, 5H), 3.89 (s, 3H), 3.87 (s, 3H), 2.26 (q,  $J$  = 7.4 Hz, 2H), 0.78 (t,  $J$  = 7.4 Hz, 3H);  $^{13}\text{C}$  NMR (100 MHz, Chloroform-*d*)  $\delta$  163.5, 159.3, 158.9, 143.0, 138.4, 132.2, 132.0, 131.7, 130.0, 129.2, 127.9, 125.9, 125.0, 124.5, 116.8, 114.5, 114.1, 55.4, 55.2, 24.3, 13.9; IR (neat):  $\nu$  1651, 1603, 1507, 1241, 1174, 1105, 825  $\text{cm}^{-1}$ ; HRMS (ESI+) Calcd. for  $\text{C}_{25}\text{H}_{24}\text{NO}_3$   $[\text{M}+\text{H}]^+$ : 386.1751, found: 386.1748.



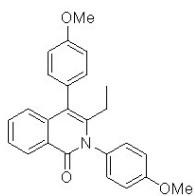

8.460  
8.452  
8.448  
8.432  
8.429  
7.531  
7.523  
7.519  
7.505  
7.501  
7.485  
7.481  
7.431  
7.428  
7.411  
7.383  
7.380  
7.267  
7.257  
7.246  
7.240  
7.235  
7.225  
7.052  
7.043  
7.034  
7.028  
7.021  
7.012  
7.006

3.885  
3.865

2.296  
2.288  
2.279  
2.269  
2.251  
2.232

0.803  
0.784  
0.766

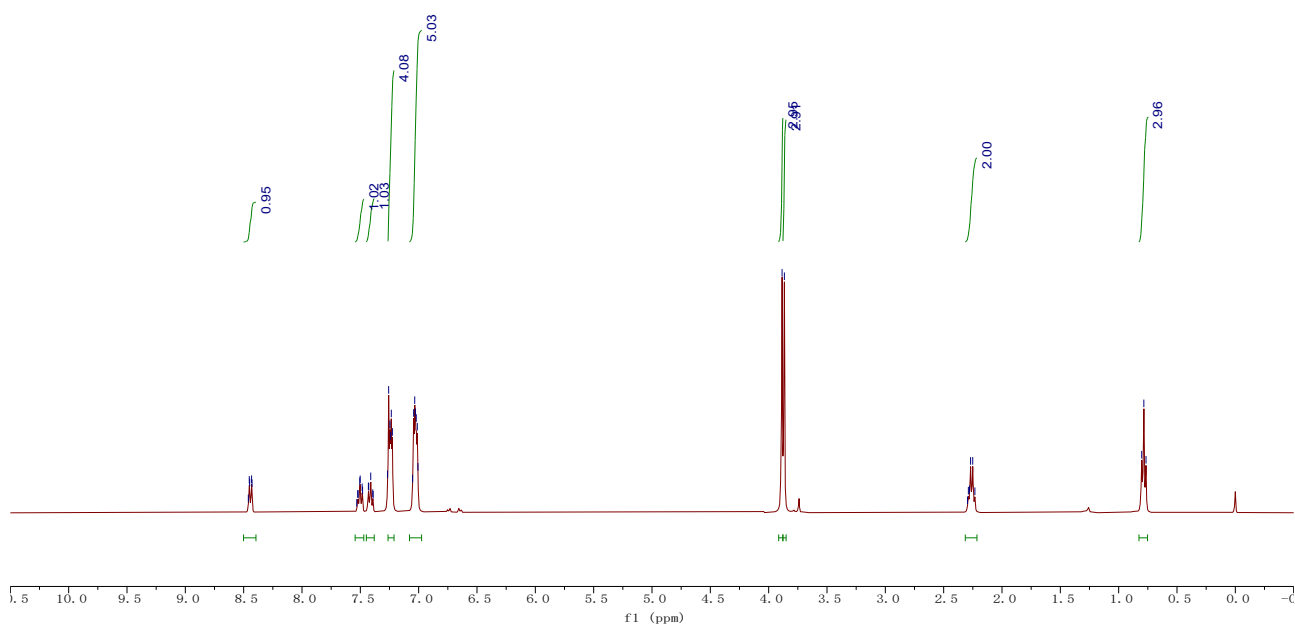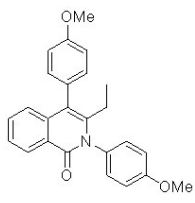

163.521  
159.258  
158.903  
143.018  
138.427  
132.185  
132.031  
131.678  
129.963  
129.166  
127.932  
125.921  
125.038  
124.532  
116.786  
114.510  
114.115

77.318  
77.000  
76.682

55.440  
55.241

24.305  
13.861

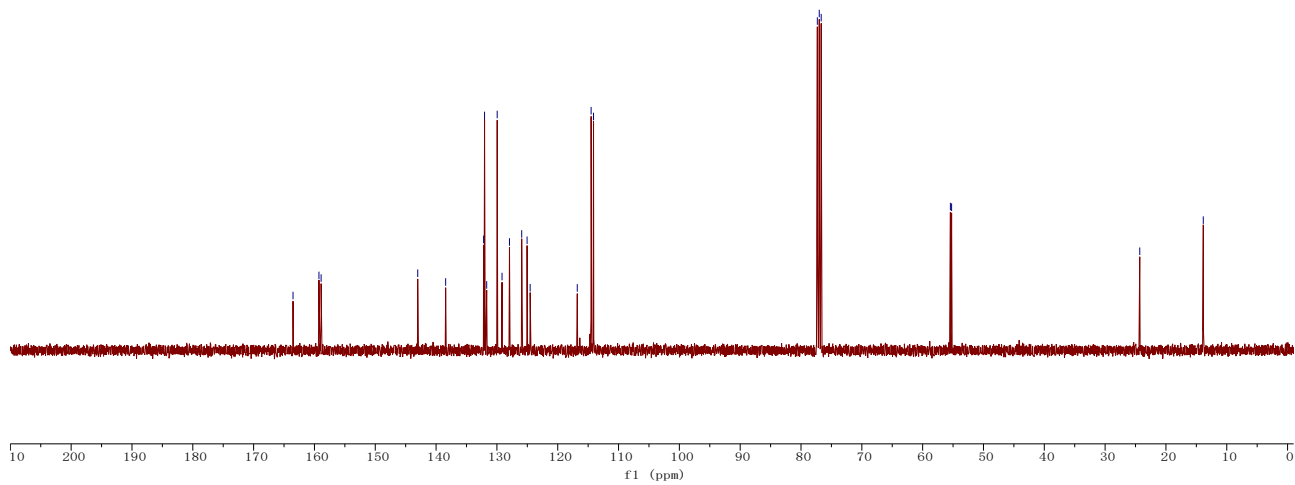

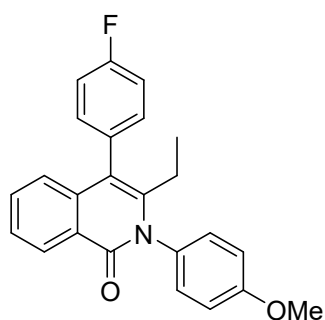

**Compound 3e:** Yield: 52.2 mg, 70%; A white solid; Mp: > 200 °C; Isolated by column chromatography on silica gel (PE/EtOAc = 4:1,  $R_f = 0.4$ );  $^1\text{H}$  NMR (400 MHz, Chloroform-*d*)  $\delta$  8.45 (dd,  $J = 8.0, 1.5$  Hz, 1H), 7.56 – 7.48 (m, 1H), 7.46 – 7.40 (m, 1H), 7.34 – 7.27 (m, 2H), 7.26 – 7.22 (m, 2H), 7.19 (t,  $J = 8.6$  Hz, 2H), 7.07 – 6.99 (m, 2H), 6.95 (d,  $J = 8.1$  Hz, 1H), 3.87 (s, 3H), 2.24 (q,  $J = 7.4$  Hz, 2H), 0.78 (t,  $J = 7.4$  Hz, 3H);  $^{13}\text{C}$  NMR (100 MHz, Chloroform-*d*)  $\delta$  163.5, 162.2 (d,  $J = 246.7$  Hz), 159.3, 143.1, 138.0, 132.9 (d,  $J = 3.5$  Hz), 132.6 (d,  $J = 7.9$  Hz), 132.3, 131.5, 129.9, 128.0, 126.1, 124.8, 124.5, 116.1, 115.8 (d,  $J = 21.4$  Hz), 114.6, 55.4, 24.3, 13.8;  $^{19}\text{F}$  NMR (376 MHz, Chloroform-*d*)  $\delta$  -114.49 – -114.58 (m); IR (neat):  $\nu$  1651, 1613, 1505, 1247, 1230, 1216, 1029, 821, 781  $\text{cm}^{-1}$ ; HRMS (ESI+) Calcd. for  $\text{C}_{24}\text{H}_{21}\text{NO}_2\text{F}$   $[\text{M}+\text{H}]^+$ : 374.1551, found: 374.1551.

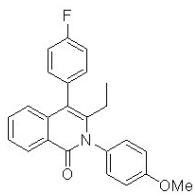

8.458  
8.454  
8.438  
8.435  
7.536  
7.532  
7.518  
7.515  
7.512  
7.498  
7.494  
7.446  
7.443  
7.425  
7.408  
7.405  
7.318  
7.312  
7.304  
7.297  
7.287  
7.283  
7.257  
7.254  
7.249  
7.238  
7.232  
7.224  
7.210  
7.189  
7.171  
7.167  
7.056  
7.047  
7.042  
7.031  
7.025  
7.017  
6.988  
6.962  
6.942  
3.866  
2.269  
2.250  
2.231  
2.213  
0.800  
0.782  
0.763

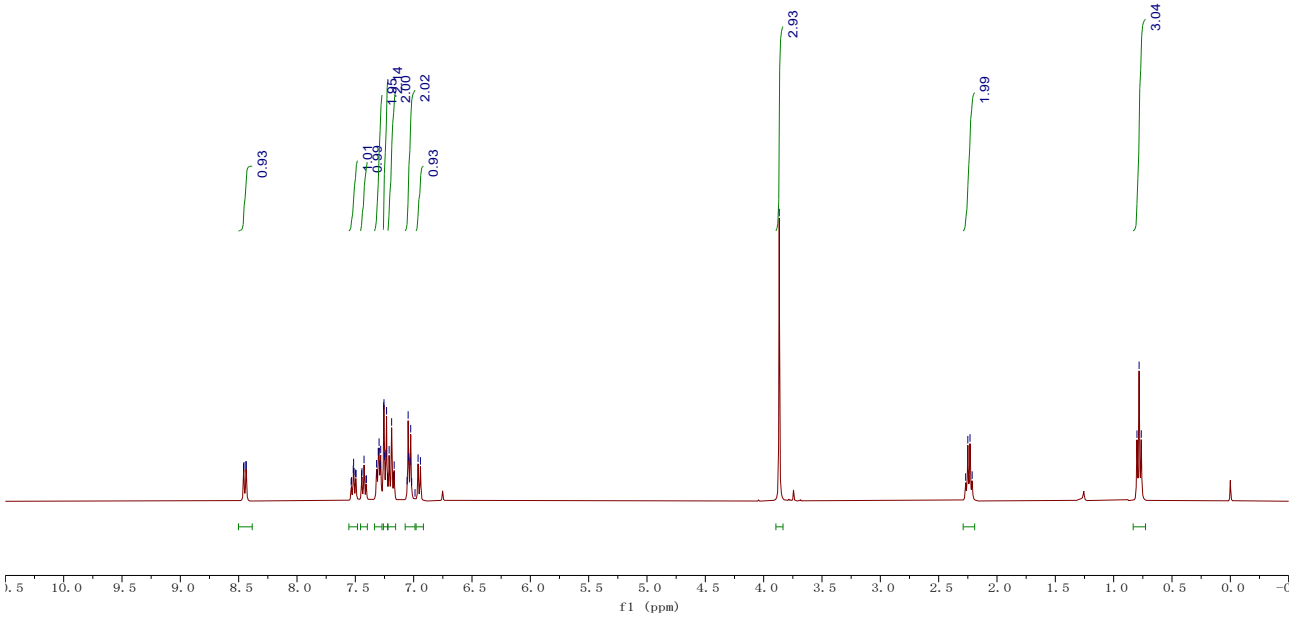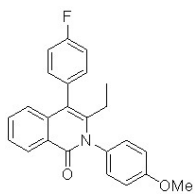

163.473  
163.447  
160.996  
159.328  
143.057  
138.009  
132.962  
132.917  
132.677  
132.589  
132.333  
131.474  
129.922  
128.044  
126.112  
124.758  
124.541  
116.080  
115.883  
115.670  
114.561

77.318  
77.000  
76.682  
55.442  
24.275  
13.772

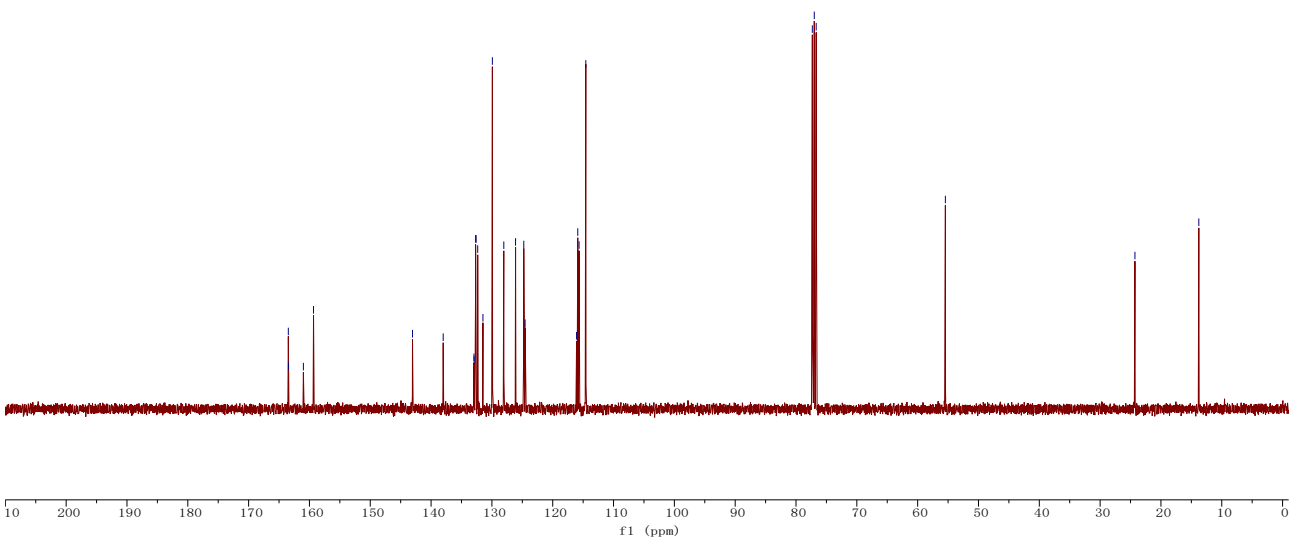

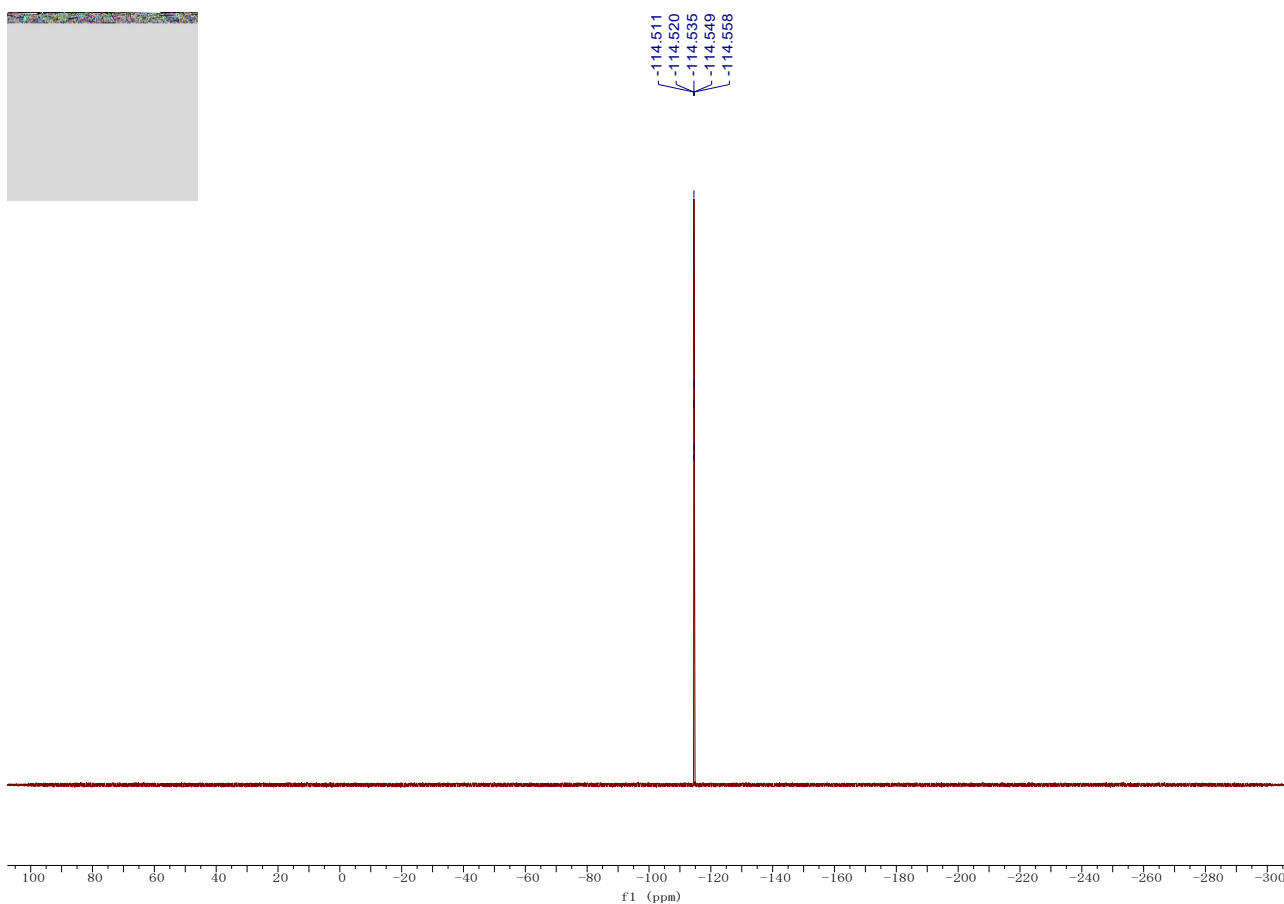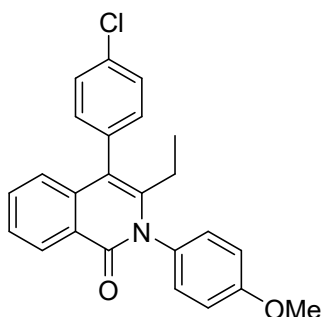

**Compound 3f:** Yield: 73.9 mg, 95%; A white solid; Mp: > 200 °C; Isolated by column chromatography on silica gel (PE/EtOAc = 4:1,  $R_f$  = 0.4);  $^1\text{H}$  NMR (400 MHz, Chloroform-*d*)  $\delta$  8.44 (d,  $J$  = 7.9 Hz, 1H), 7.55 – 7.39 (m, 4H), 7.29 – 7.22 (m, 4H), 7.04 (d,  $J$  = 8.2 Hz, 2H), 6.95 (d,  $J$  = 8.2 Hz, 1H), 3.87 (s, 3H), 2.24 (q,  $J$  = 7.4 Hz, 2H), 0.78 (t,  $J$  = 7.4 Hz, 3H);  $^{13}\text{C}$  NMR (100 MHz, Chloroform-*d*)  $\delta$  163.5, 159.3, 142.9, 137.7, 135.6, 133.6, 132.42, 132.37, 131.4, 129.9, 129.1, 128.1, 126.2, 124.7, 124.5, 115.9, 114.6, 55.5, 24.3, 13.8; IR (neat):  $\nu$  2932, 1651, 1612, 1507, 1246, 1087, 820, 779, 708  $\text{cm}^{-1}$ ; HRMS (ESI+) Calcd. for  $\text{C}_{24}\text{H}_{21}\text{NO}_2\text{Cl}$   $[\text{M}+\text{H}]^+$ : 390.1255, found: 390.1259.

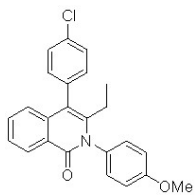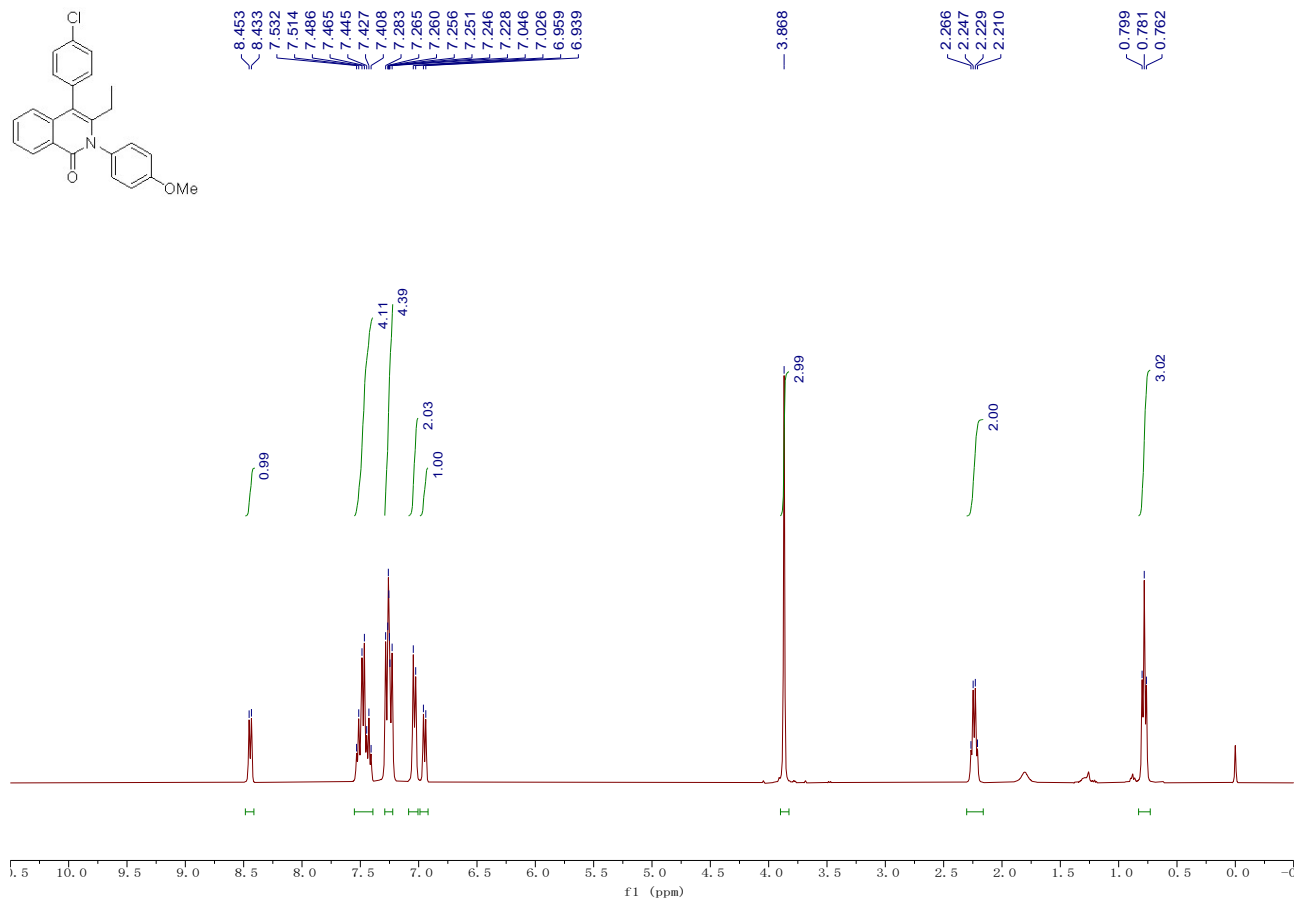

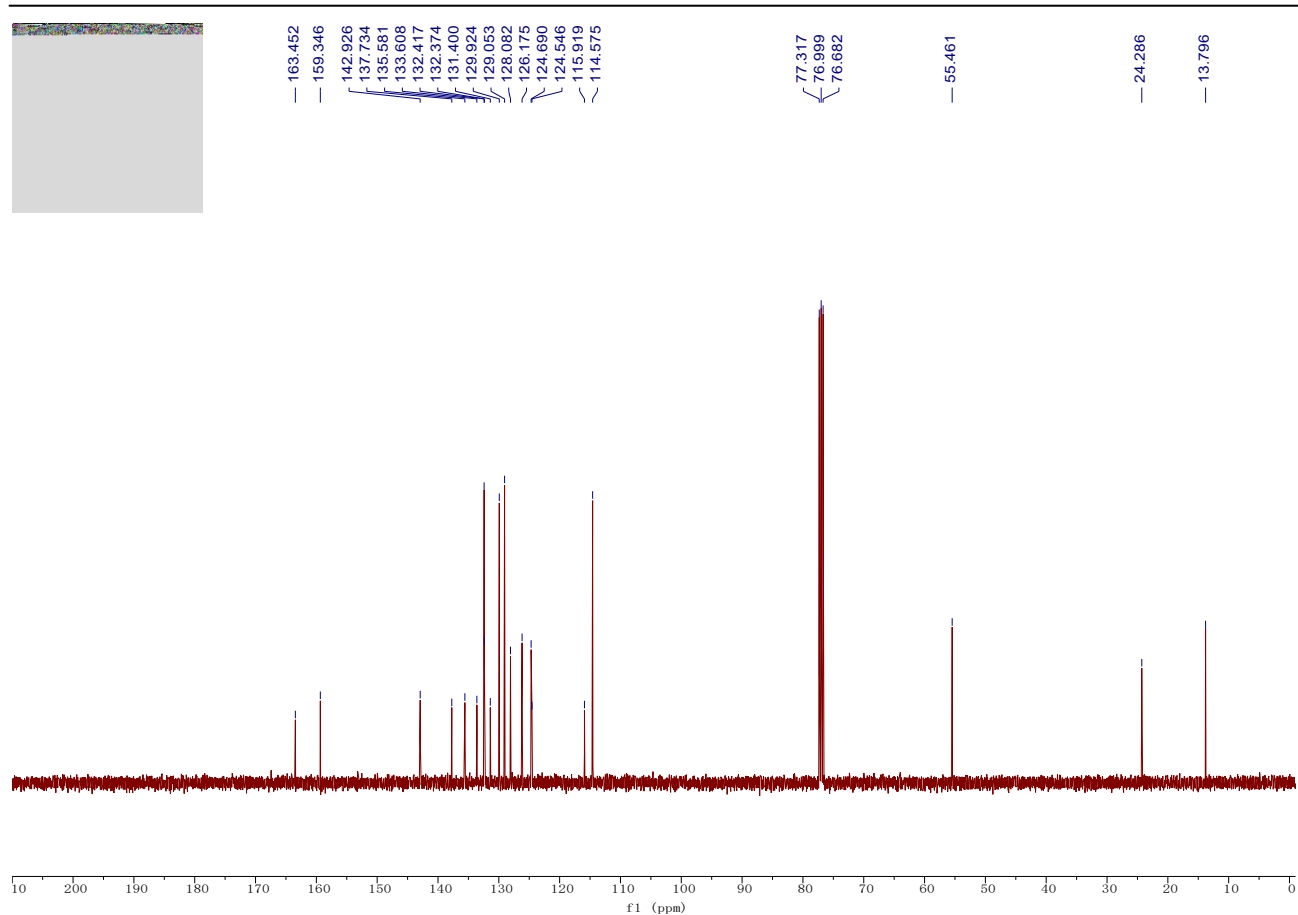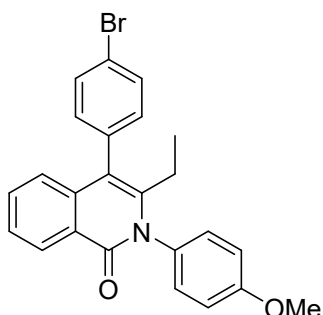

**Compound 3g:** Yield: 84.9 mg, 98%; A white solid; Mp: > 200 °C; Isolated by column chromatography on silica gel (PE/EtOAc = 4:1,  $R_f$  = 0.4);  $^1\text{H}$  NMR (400 MHz, Chloroform-*d*)  $\delta$  8.45 (d,  $J$  = 7.9 Hz, 1H), 7.63 (d,  $J$  = 7.8 Hz, 2H), 7.51 (t,  $J$  = 7.7 Hz, 1H), 7.43 (t,  $J$  = 7.6 Hz, 1H), 7.30 – 7.18 (m, 4H), 7.04 (d,  $J$  = 8.2 Hz, 2H), 6.95 (d,  $J$  = 8.2 Hz, 1H), 3.87 (s, 3H), 2.24 (q,  $J$  = 7.4 Hz, 2H), 0.78 (t,  $J$  = 7.4 Hz, 3H);  $^{13}\text{C}$  NMR (100 MHz, Chloroform-*d*)  $\delta$  163.4, 159.3, 142.9, 137.6, 136.1, 132.8, 132.3, 132.0, 131.4, 129.9, 128.1, 126.1, 124.7, 124.5, 121.7, 115.9, 114.5, 55.4, 24.3, 13.8; IR (neat):  $\nu$  1651, 1594, 1507, 1245, 1009, 820, 779, 708  $\text{cm}^{-1}$ ; HRMS (ESI+) Calcd. for  $\text{C}_{24}\text{H}_{21}\text{NO}_2\text{Br}$   $[\text{M}+\text{H}]^+$ : 434.0750, found: 434.0755.

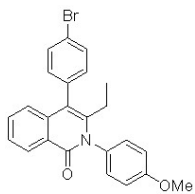

8.455  
8.435  
7.640  
7.620  
7.533  
7.514  
7.495  
7.447  
7.428  
7.409  
7.259  
7.250  
7.228  
7.207  
7.047  
6.960  
6.940

3.867

2.266  
2.247  
2.229  
2.210

0.800  
0.782  
0.763

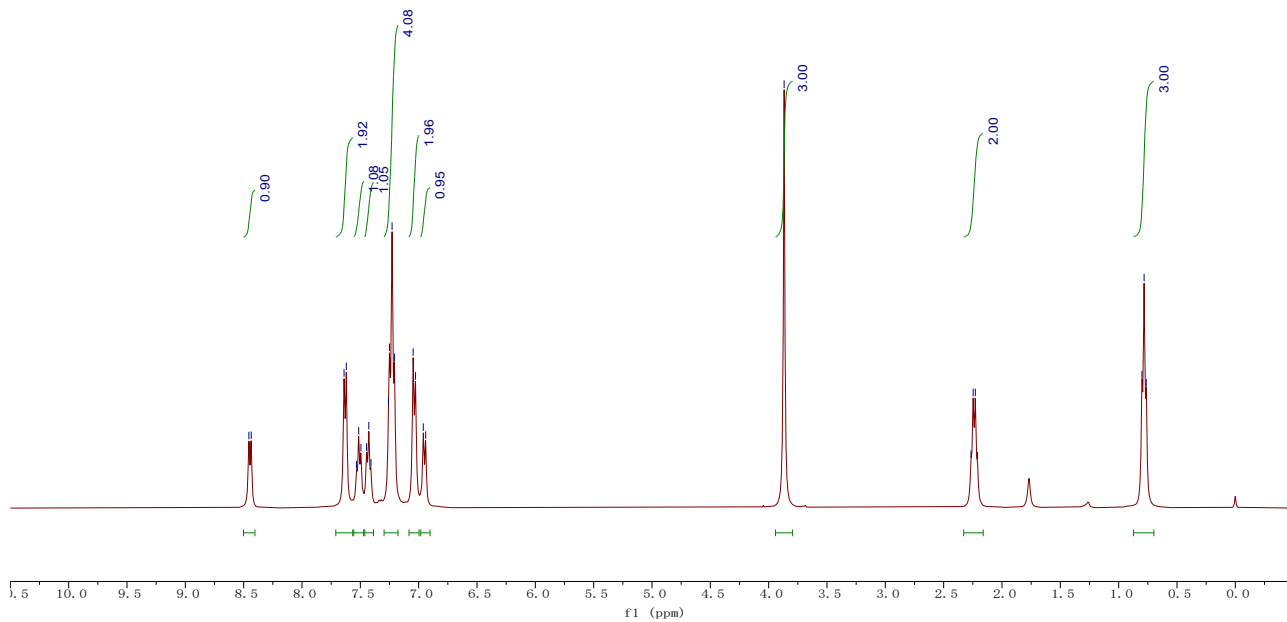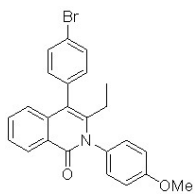

163.396  
159.317  
142.851  
137.621  
136.071  
132.750  
132.348  
131.988  
131.364  
129.897  
128.058  
126.149  
124.656  
124.529  
121.743  
115.852  
114.546

77.318  
77.000  
76.682

55.426

24.271

13.789

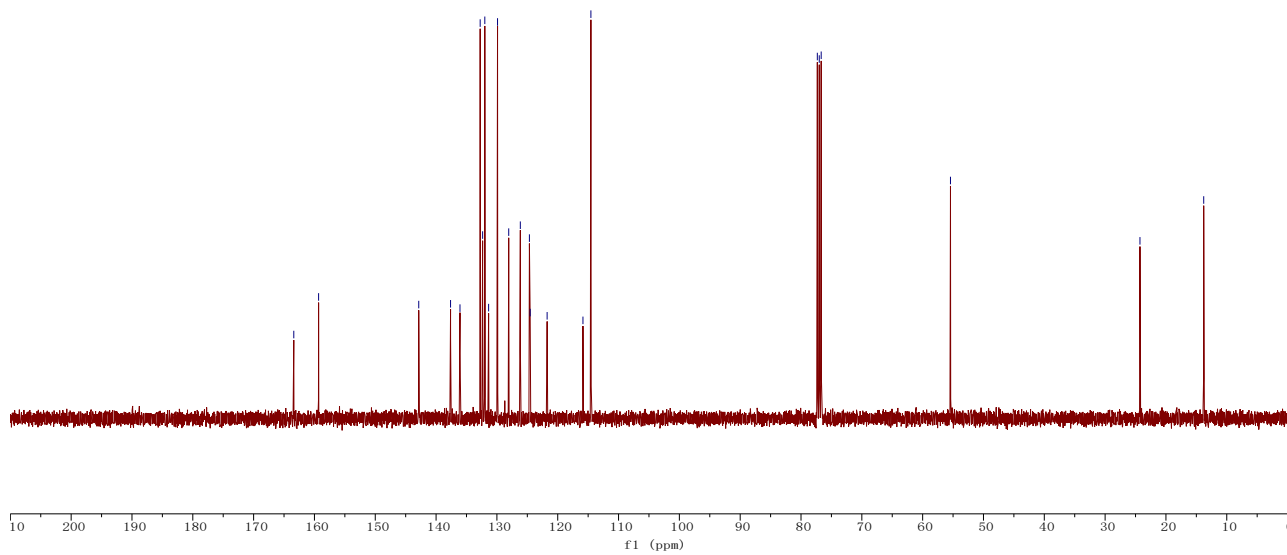

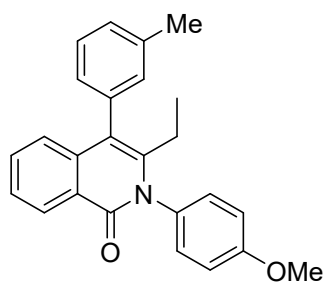

**Compound 3i:** Yield: 71.6 mg, 97%; A white solid; Mp: > 200 °C; Isolated by column chromatography on silica gel (PE/EtOAc = 4:1,  $R_f$  = 0.4);  $^1\text{H}$  NMR (400 MHz, Chloroform-*d*)  $\delta$  8.44 (d,  $J$  = 7.9 Hz, 1H), 7.54 – 7.45 (m, 1H), 7.45 – 7.33 (m, 2H), 7.31 – 7.21 (m, 3H), 7.18 – 7.09 (m, 2H), 7.08 – 6.96 (m, 3H), 3.86 (s, 3H), 2.42 (s, 3H), 2.33 – 2.19 (m, 2H), 0.79 (t,  $J$  = 7.4 Hz, 3H);  $^{13}\text{C}$  NMR (100 MHz, Chloroform-*d*)  $\delta$  163.5, 159.2, 142.5, 138.3, 138.1, 137.0, 132.2, 131.62, 131.58, 130.0, 129.9, 128.5, 128.2, 128.0, 127.9, 125.9, 125.1, 124.5, 117.3, 114.51, 114.47, 55.4, 24.3, 21.4, 13.9; IR (neat):  $\nu$  2961, 1653, 1614, 1589, 1507, 1244, 1027, 791, 705  $\text{cm}^{-1}$ ; HRMS (ESI+) Calcd. for  $\text{C}_{25}\text{H}_{24}\text{NO}_2$   $[\text{M}+\text{H}]^+$ : 370.1802, found: 370.1811.

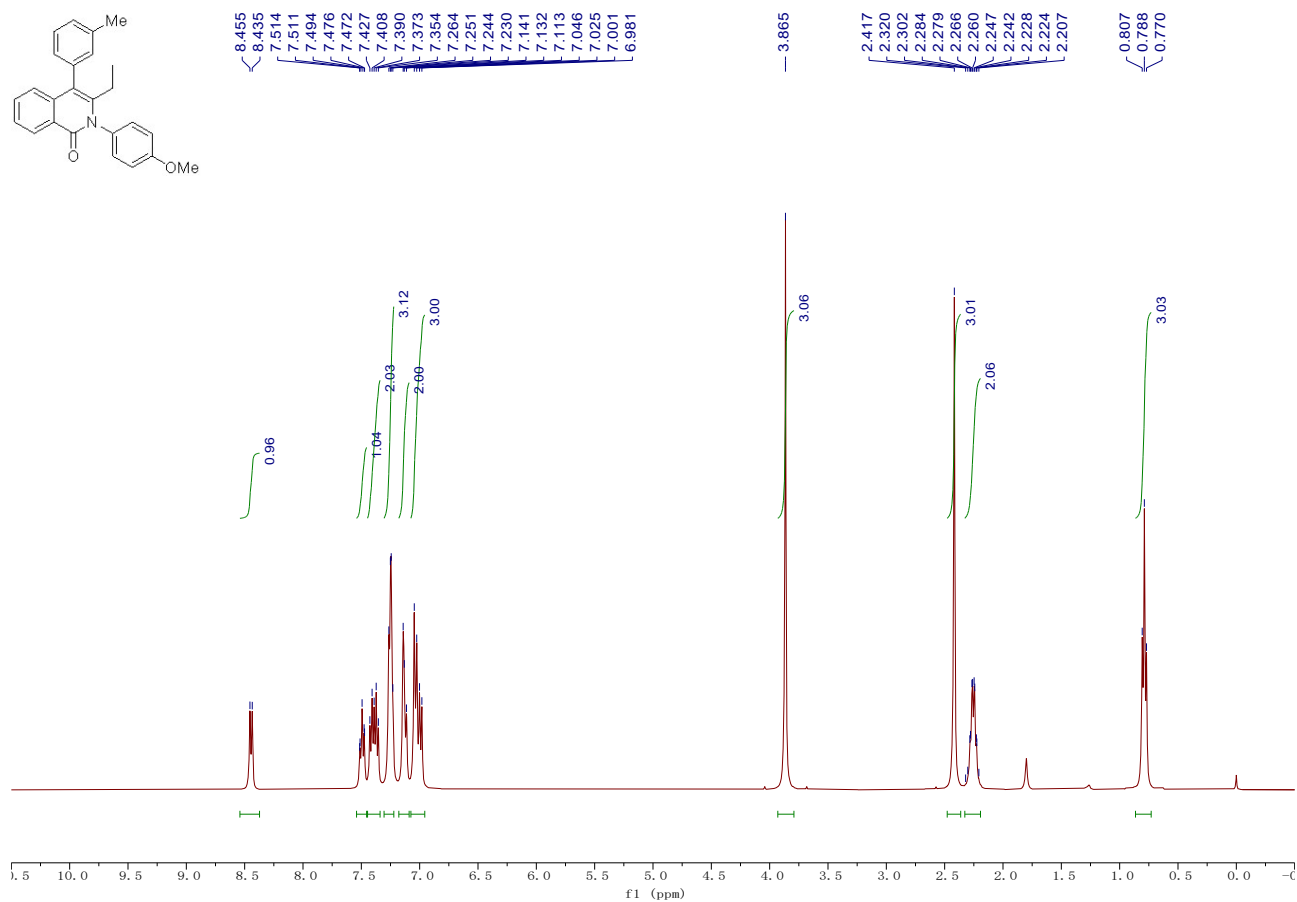



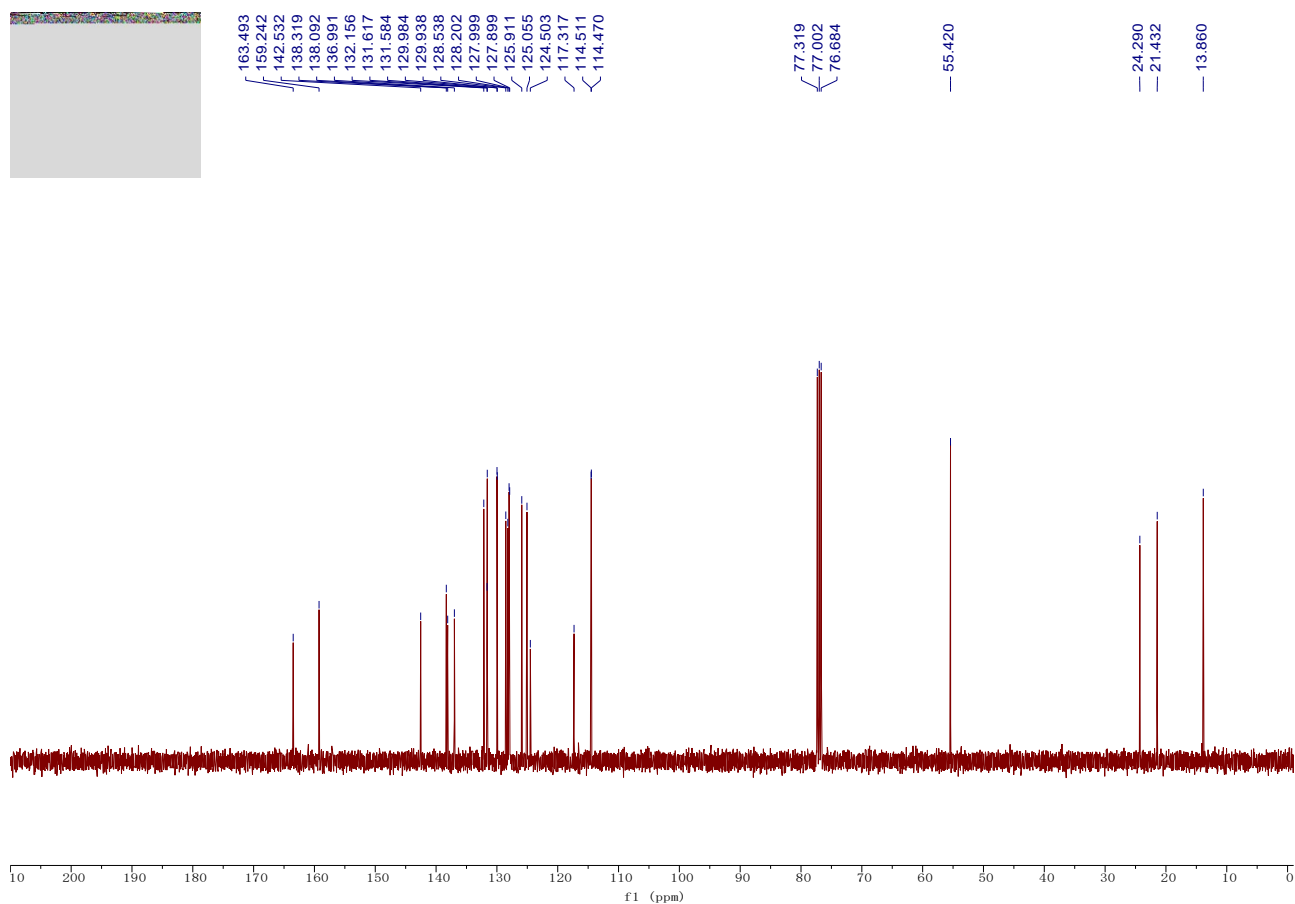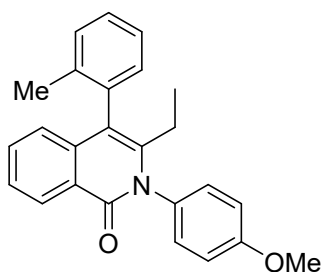

**Compound 3j:** Yield: 64.2 mg, 87%; A white solid; Mp: > 200 °C; Isolated by column chromatography on silica gel (PE/EtOAc = 4:1,  $R_f$  = 0.4);  $^1\text{H}$  NMR (400 MHz, Chloroform-*d*)  $\delta$  8.46 (d,  $J$  = 7.9 Hz, 1H), 7.49 (t,  $J$  = 7.6 Hz, 1H), 7.41 (t,  $J$  = 7.6 Hz, 1H), 7.38 – 7.33 (m, 2H), 7.33 – 7.26 (m, 2H), 7.25 – 7.19 (m, 2H), 7.09 – 6.99 (m, 2H), 6.86 (d,  $J$  = 8.1 Hz, 1H), 3.87 (s, 3H), 2.33 – 2.21 (m, 1H), 2.20 – 2.11 (m, 1H), 2.09 (s, 3H), 0.75 (t,  $J$  = 7.4 Hz, 3H);  $^{13}\text{C}$  NMR (100 MHz, Chloroform-*d*)  $\delta$  163.6, 159.3, 142.3, 137.7, 137.4, 136.2, 132.4, 131.6, 131.4, 130.3, 130.1, 129.8, 128.1, 127.9, 126.2, 126.1, 124.7, 124.4, 116.1, 114.6, 114.5, 55.4, 24.2, 19.8, 13.1; IR (neat):  $\nu$  2974, 1647, 1509, 1331, 1246, 1031, 823, 775, 765, 705  $\text{cm}^{-1}$ ; HRMS (ESI+) Calcd. for  $\text{C}_{25}\text{H}_{24}\text{NO}_2$   $[\text{M}+\text{H}]^+$ : 370.1802, found: 370.1801.



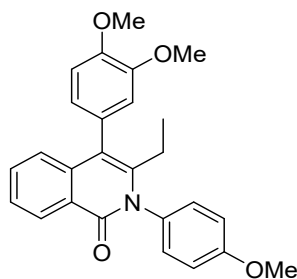

**Compound 3k:** Yield: 78.8 mg, 95%; A white solid; Mp: > 200 °C; Isolated by column chromatography on silica gel (PE/EtOAc = 2:1,  $R_f$  = 0.3);  $^1\text{H}$  NMR (400 MHz, Chloroform-*d*)  $\delta$  8.44 (d,  $J$  = 8.0 Hz, 1H), 7.52 (t,  $J$  = 7.6 Hz, 1H), 7.42 (t,  $J$  = 7.6 Hz, 1H), 7.25 (d,  $J$  = 8.8 Hz, 2H), 7.10 – 6.96 (m, 4H), 6.93 – 6.81 (m, 2H), 3.97 (s, 3H), 3.92 – 3.80 (m, 6H), 2.29 (q, 2H), 0.81 (t,  $J$  = 7.4 Hz, 3H);  $^{13}\text{C}$  NMR (100 MHz, Chloroform-*d*)  $\delta$  163.6, 159.3, 149.1, 148.4, 143.1, 138.4, 132.3, 131.7, 130.04, 130.03, 129.6, 128.0, 126.0, 125.1, 124.6, 123.3, 117.0, 114.61, 114.57, 114.0, 111.3, 56.0, 55.9, 55.5, 24.4, 14.1; IR (neat):  $\nu$  2935, 1650, 1507, 1246, 1234, 1164, 1141, 1029, 817, 781  $\text{cm}^{-1}$ ; HRMS (ESI+) Calcd. for  $\text{C}_{26}\text{H}_{26}\text{NO}_4$   $[\text{M}+\text{H}]^+$ : 416.1856, found: 416.1863.

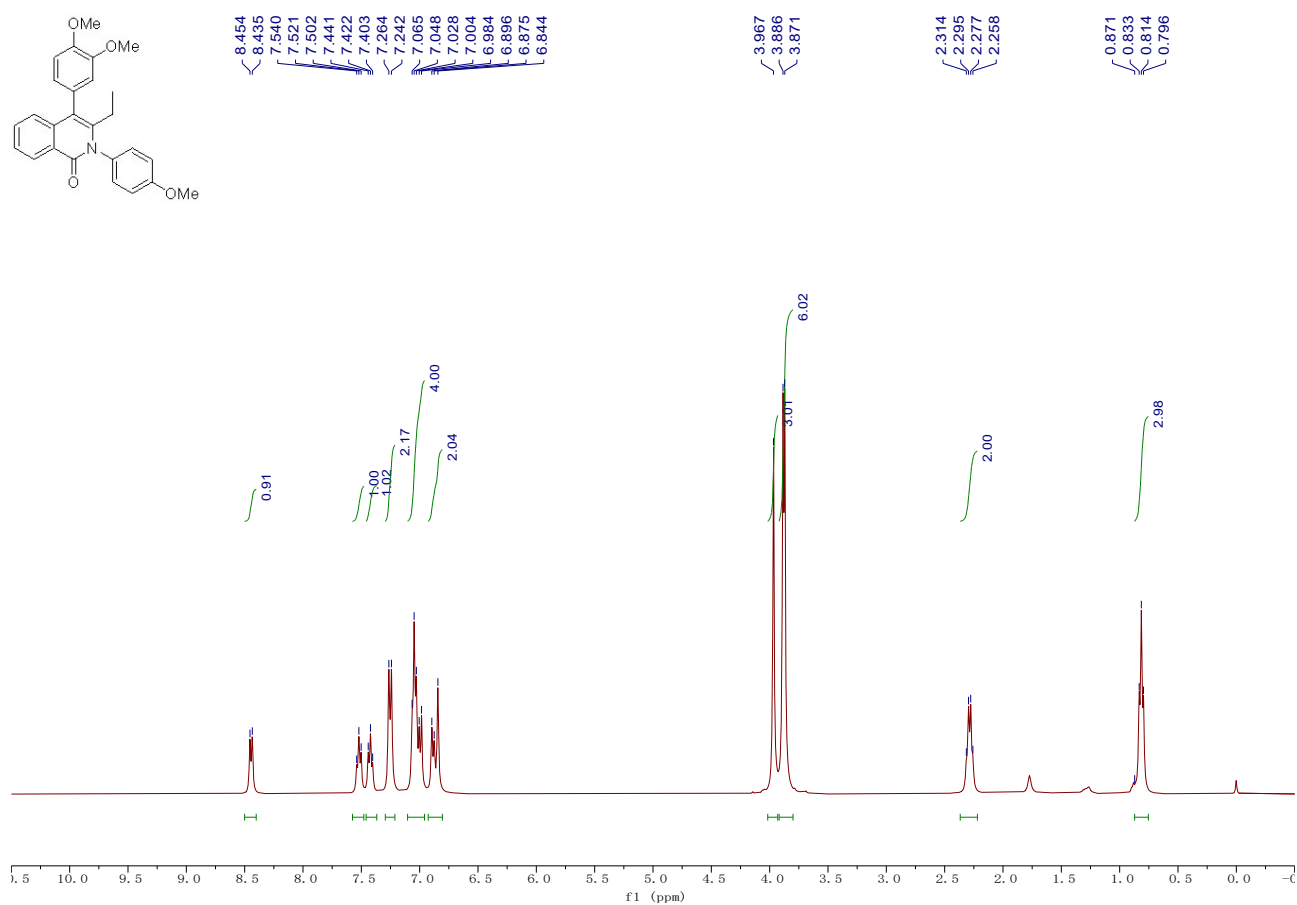

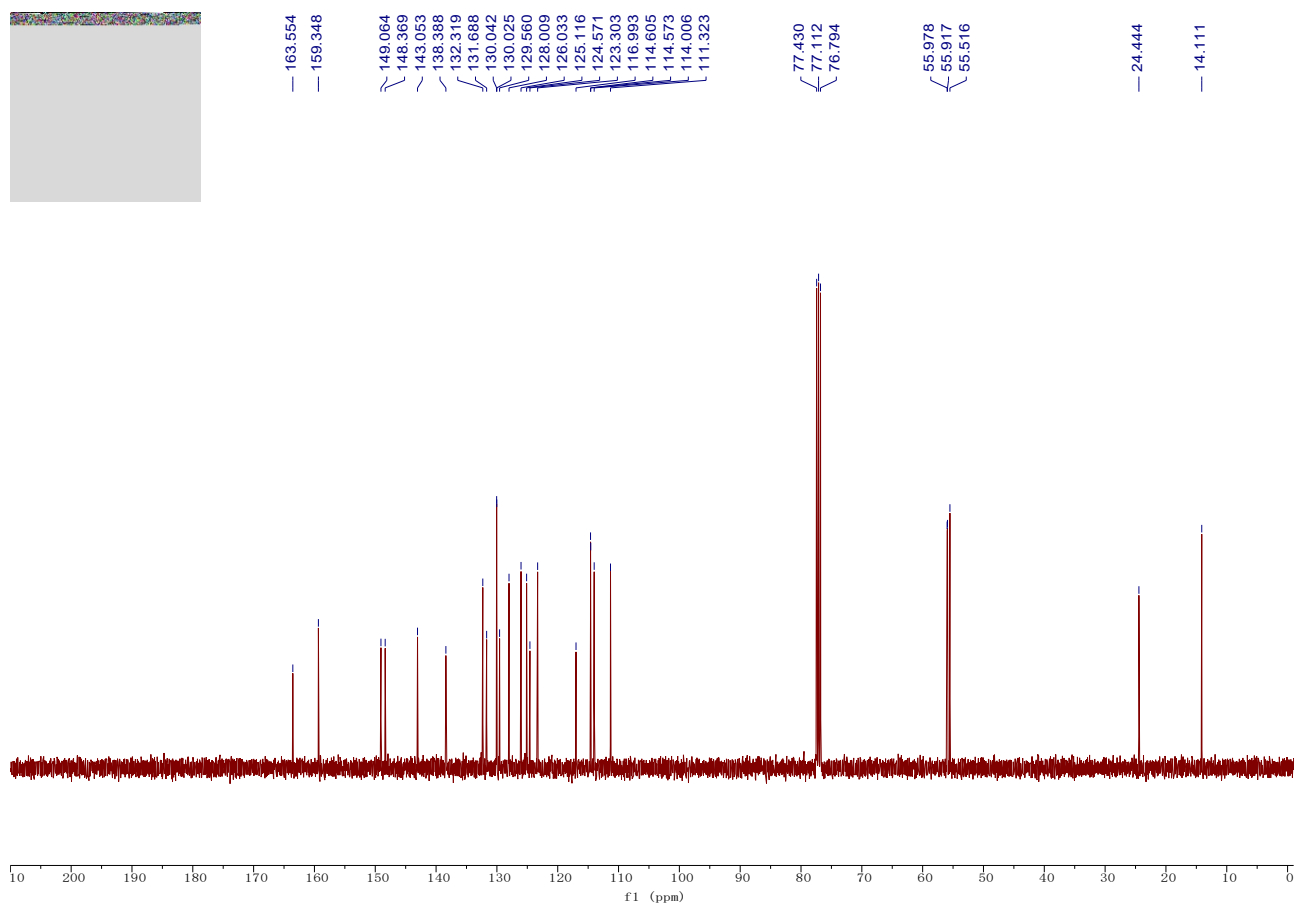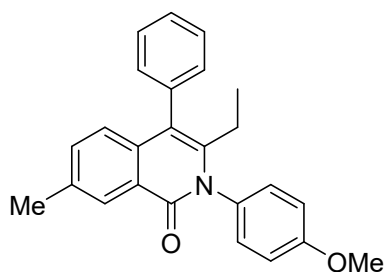

**Compound 3l:** Yield: 64.2 mg, 87%; A white solid; Mp: 183 - 185 °C; Isolated by column chromatography on silica gel (PE/EtOAc = 4:1,  $R_f$  = 0.4); <sup>1</sup>H NMR (400 MHz, Chloroform-*d*) δ 8.25 (s, 1H), 7.52 – 7.38 (m, 3H), 7.37 – 7.28 (m, 3H), 7.25 (d,  $J$  = 8.5 Hz, 2H), 7.03 (d,  $J$  = 8.3 Hz, 2H), 6.87 (d,  $J$  = 8.3 Hz, 1H), 3.87 (s, 3H), 2.45 (s, 3H), 2.23 (q,  $J$  = 7.4 Hz, 2H), 0.77 (t,  $J$  = 7.4 Hz, 3H); <sup>13</sup>C NMR (100 MHz, Chloroform-*d*) δ 163.5, 159.2, 141.6, 137.3, 136.0, 135.8, 133.7, 131.8, 131.0, 130.0, 128.7, 127.5, 127.4, 125.0, 124.5, 117.1, 114.5, 55.4, 24.2, 21.2, 13.9; IR (neat): ν 2956, 1654, 1507, 1333, 1248, 1027, 827, 702 cm<sup>-1</sup>; HRMS (ESI+) Calcd. for C<sub>25</sub>H<sub>24</sub>NO<sub>2</sub> [M+H]<sup>+</sup>: 370.1802, found: 370.1804.

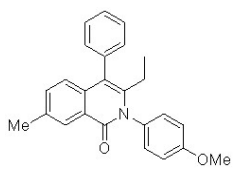

8.245  
7.500  
7.481  
7.463  
7.438  
7.421  
7.402  
7.328  
7.323  
7.307  
7.259  
7.254  
7.237  
7.042  
7.021  
6.883  
6.862

3.865

2.447  
2.287  
2.256  
2.237  
2.218  
2.200

0.788  
0.769  
0.751

0.91  
2.02  
2.91  
2.12  
2.01  
0.96

3.00

3.02  
2.05

3.01

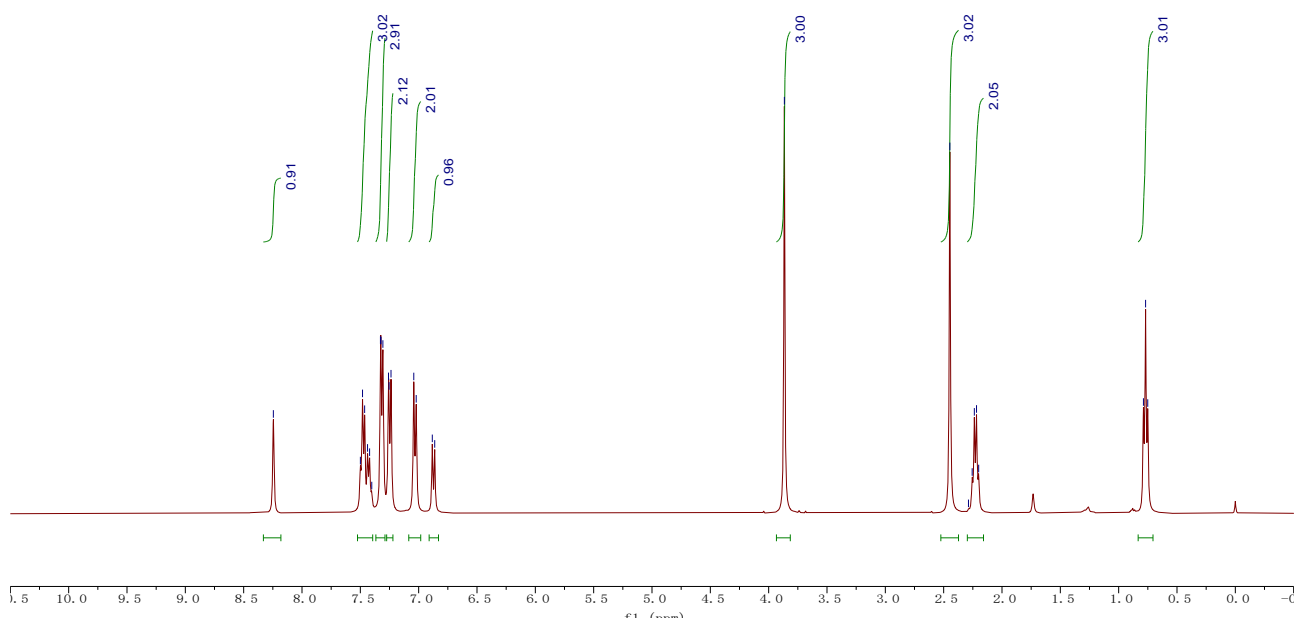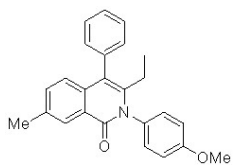

163.464  
159.223  
141.629  
137.318  
135.988  
135.791  
133.690  
131.754  
130.996  
129.993  
128.661  
127.486  
127.423  
124.985  
124.470  
117.148  
114.487

77.318  
77.000  
76.682

55.427

24.183  
21.222  
13.873

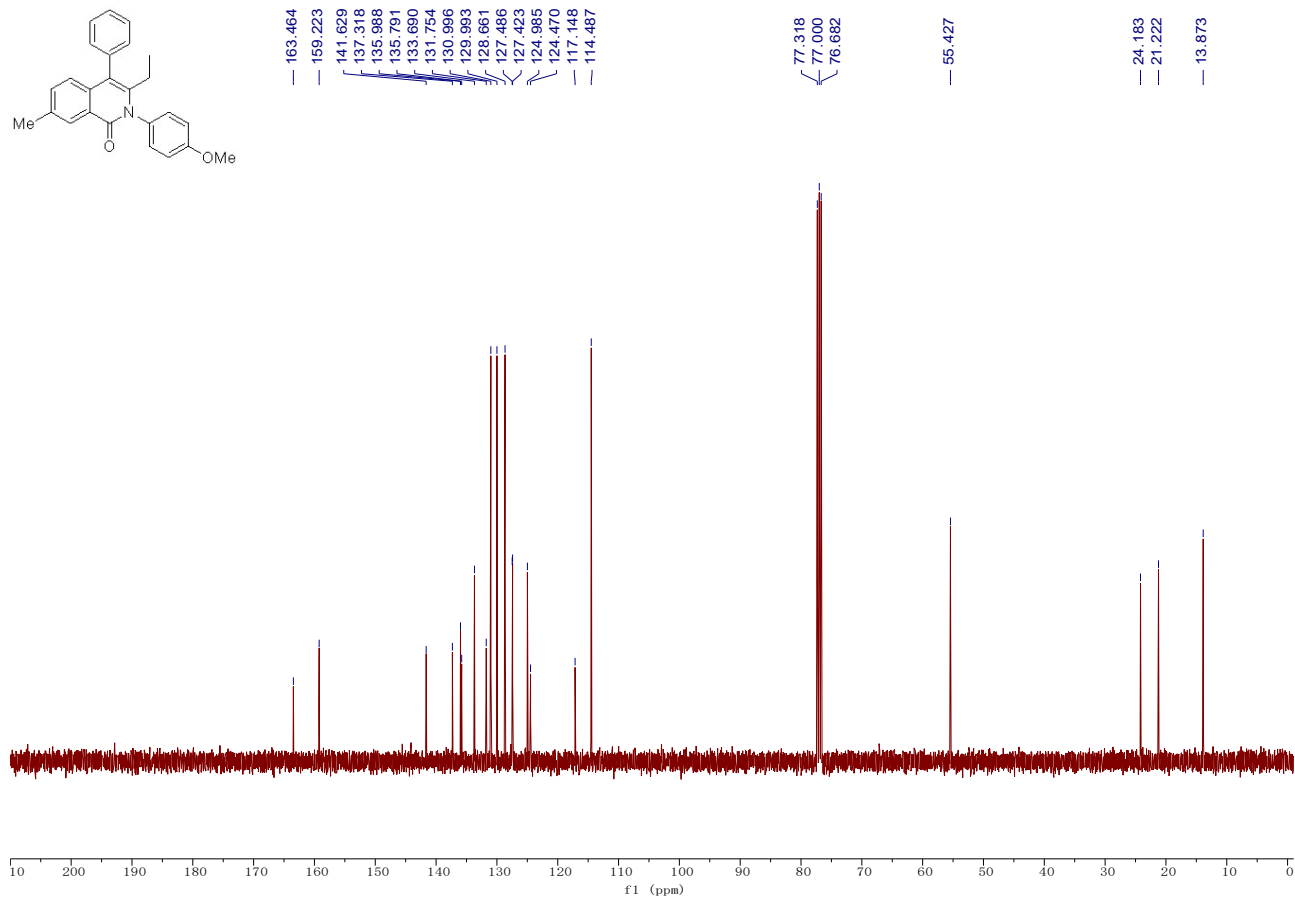

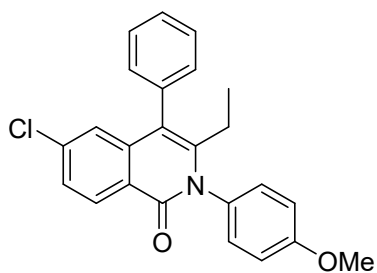

**Compound 3m:** Yield: 76.2 mg, 98%; A white solid; Mp: 188 - 190 °C; Isolated by column chromatography on silica gel (PE/EtOAc = 4:1,  $R_f = 0.4$ );  $^1\text{H}$  NMR (400 MHz, Chloroform-*d*)  $\delta$  8.37 (d,  $J = 8.6$  Hz, 1H), 7.57 – 7.42 (m, 3H), 7.35 (dd,  $J = 8.6, 2.0$  Hz, 1H), 7.31 (d,  $J = 7.2$  Hz, 2H), 7.26 – 7.21 (m, 2H), 7.04 (d,  $J = 8.3$  Hz, 2H), 6.97 – 6.89 (m, 1H), 3.87 (s, 3H), 2.23 (q,  $J = 7.4$  Hz, 2H), 0.78 (t,  $J = 7.4$  Hz, 3H);  $^{13}\text{C}$  NMR (100 MHz, Chloroform-*d*)  $\delta$  163.0, 159.4, 144.3, 139.4, 138.9, 136.3, 131.2, 130.9, 129.9, 129.0, 127.9, 126.5, 124.3, 122.9, 116.4, 114.6, 55.4, 24.4, 13.7; IR (neat):  $\nu$  2969, 1666, 1591, 1510, 1253, 1025, 828, 779, 712  $\text{cm}^{-1}$ ; HRMS (ESI+) Calcd. for  $\text{C}_{24}\text{H}_{21}\text{NO}_2\text{Cl}$   $[\text{M}+\text{H}]^+$ : 390.1255, found: 390.1250.

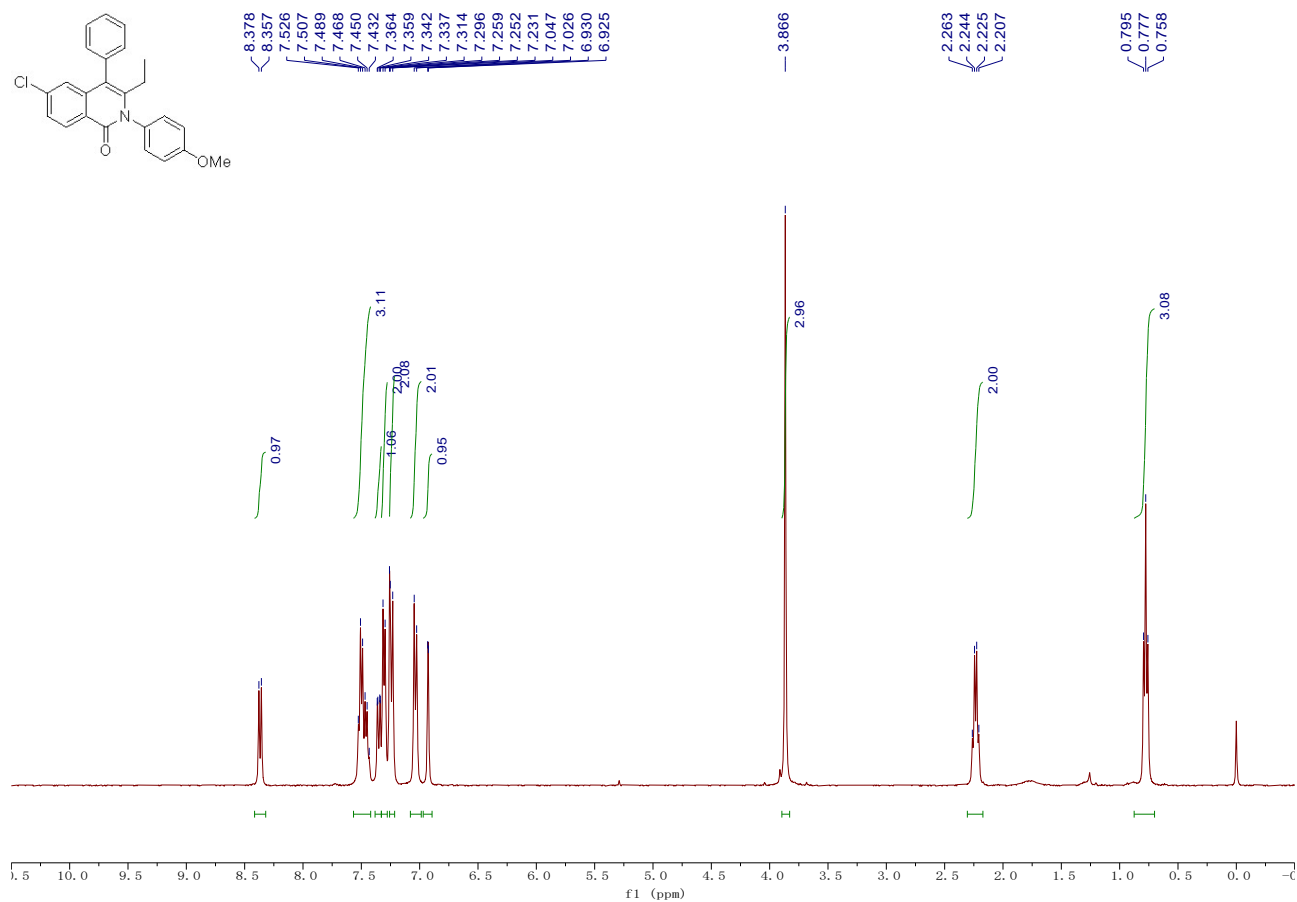

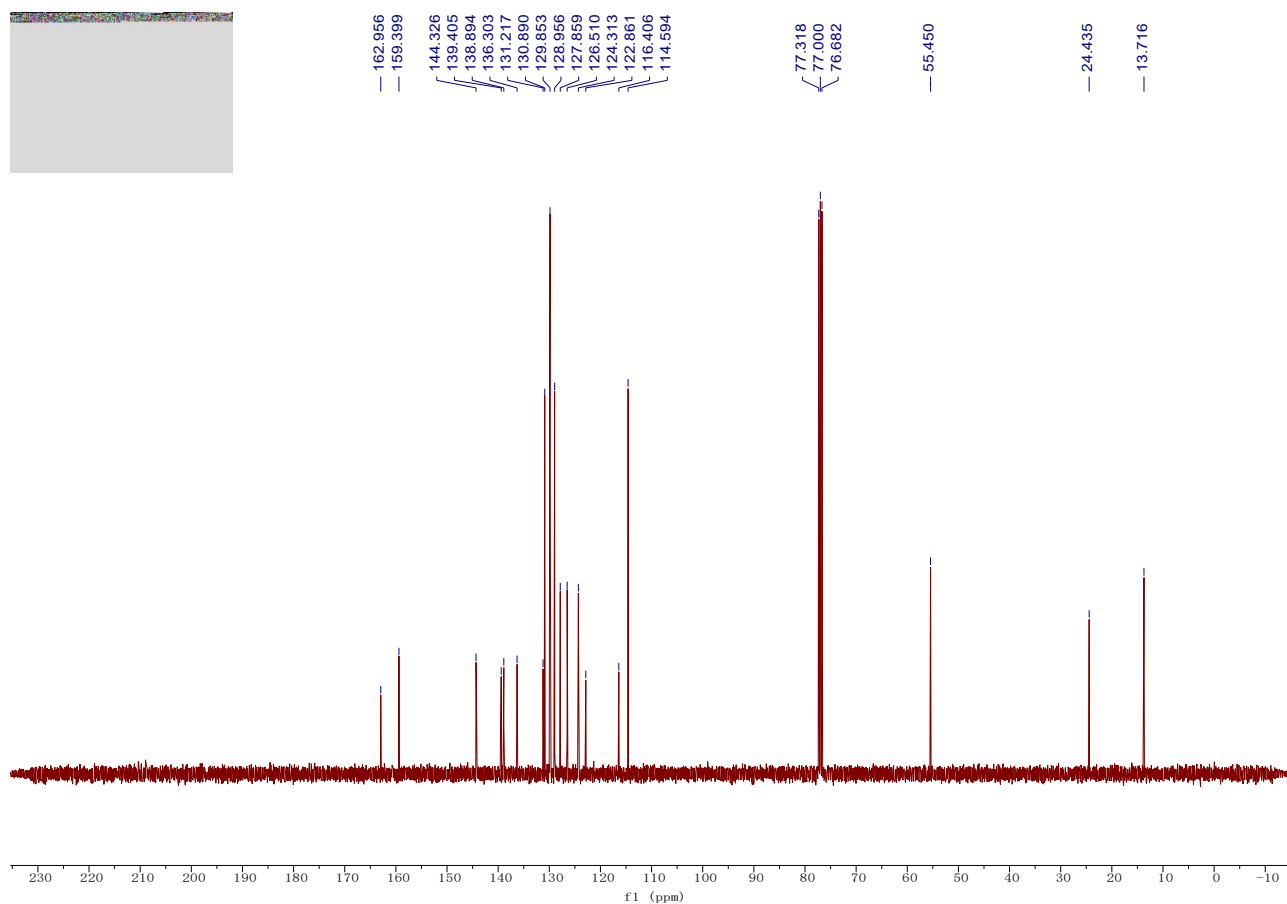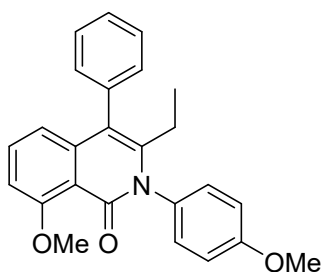

**Compound 3n'**: Yield: 73.1 mg, 95%; A white solid; Mp: > 200 °C; Isolated by column chromatography on silica gel (PE/EtOAc = 1:1,  $R_f$  = 0.4);  $^1\text{H}$  NMR (400 MHz, Chloroform-*d*)  $\delta$  7.53 – 7.44 (m, 2H), 7.43 – 7.34 (m, 2H), 7.33 – 7.28 (m, 2H), 7.22 (d,  $J$  = 8.3 Hz, 2H), 7.00 (d,  $J$  = 8.1 Hz, 2H), 6.83 (d,  $J$  = 8.1 Hz, 1H), 6.50 (d,  $J$  = 8.2 Hz, 1H), 3.94 (s, 3H), 3.85 (s, 3H), 2.18 (q,  $J$  = 7.4 Hz, 2H), 0.76 (t,  $J$  = 7.4 Hz, 3H);  $^{13}\text{C}$  NMR (100 MHz, Chloroform-*d*)  $\delta$  161.9, 161.1, 159.0, 143.5, 141.1, 137.7, 132.6, 131.8, 131.1, 130.2, 128.7, 127.4, 117.4, 116.5, 114.3, 114.2, 107.4, 56.0, 55.4, 24.4, 13.6; IR (neat):  $\nu$  1658, 1599, 1508, 1473, 1260, 1248, 1076, 815, 700  $\text{cm}^{-1}$ ; HRMS (ESI+) Calcd. for  $\text{C}_{25}\text{H}_{24}\text{NO}_3$   $[\text{M}+\text{H}]^+$ : 386.1751, found: 386.1741.

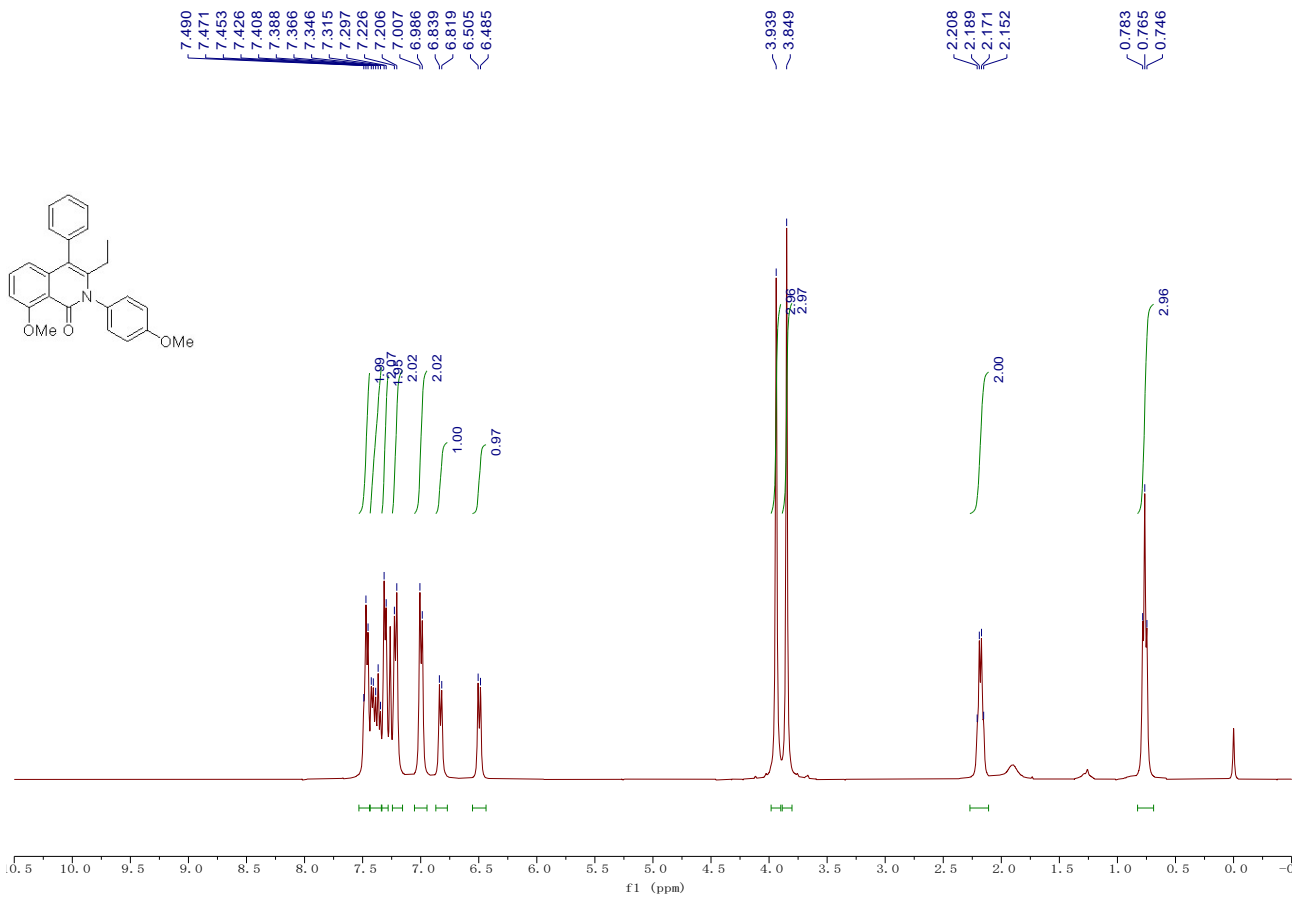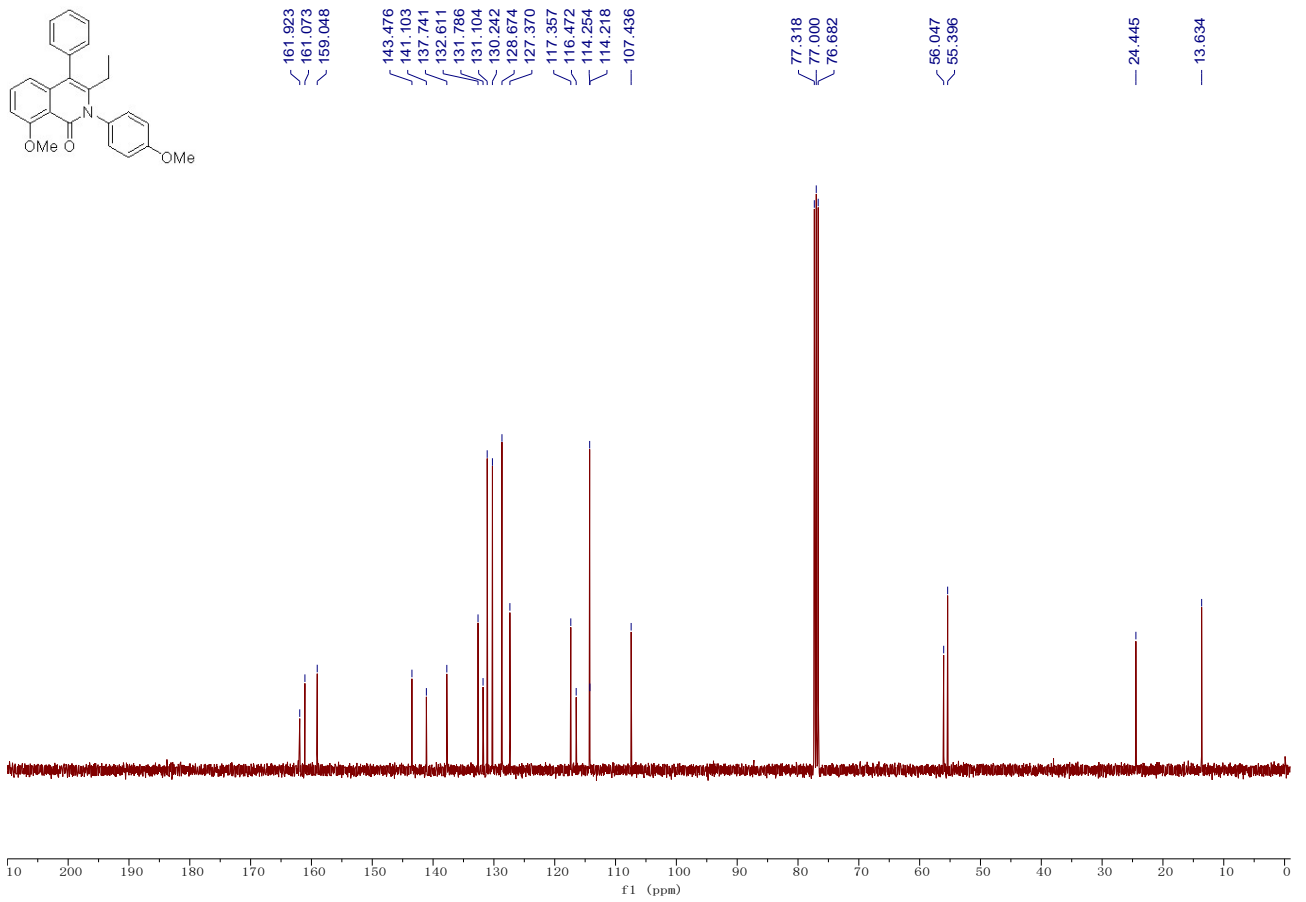



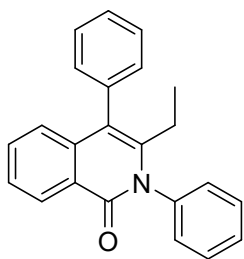

**Compound 3o:** Yield: 46.8 mg, 72%; A white solid; Mp: 198 - 200 °C; Isolated by column chromatography on silica gel (PE/EtOAc = 4:1,  $R_f = 0.5$ );  $^1\text{H}$  NMR (400 MHz, Chloroform-*d*)  $\delta$  8.45 (dd,  $J = 8.0, 1.5$  Hz, 1H), 7.57 – 7.39 (m, 8H), 7.38 – 7.29 (m, 4H), 6.98 (d,  $J = 8.1$  Hz, 1H), 2.23 (q,  $J = 7.4$  Hz, 2H), 0.77 (t,  $J = 7.4$  Hz, 3H);  $^{13}\text{C}$  NMR (100 MHz, Chloroform-*d*)  $\delta$  163.3, 142.3, 139.0, 138.1, 137.0, 132.3, 131.0, 129.3, 129.1, 128.8, 128.5, 127.9, 127.6, 126.1, 125.0, 124.6, 117.3, 24.3, 13.8; IR (neat):  $\nu$  3047, 1655, 1614, 1588, 1484, 1330, 777, 701  $\text{cm}^{-1}$ ; HRMS (ESI+) Calcd. for  $\text{C}_{23}\text{H}_{20}\text{NO}$   $[\text{M}+\text{H}]^+$ : 326.1539, found: 326.1541.

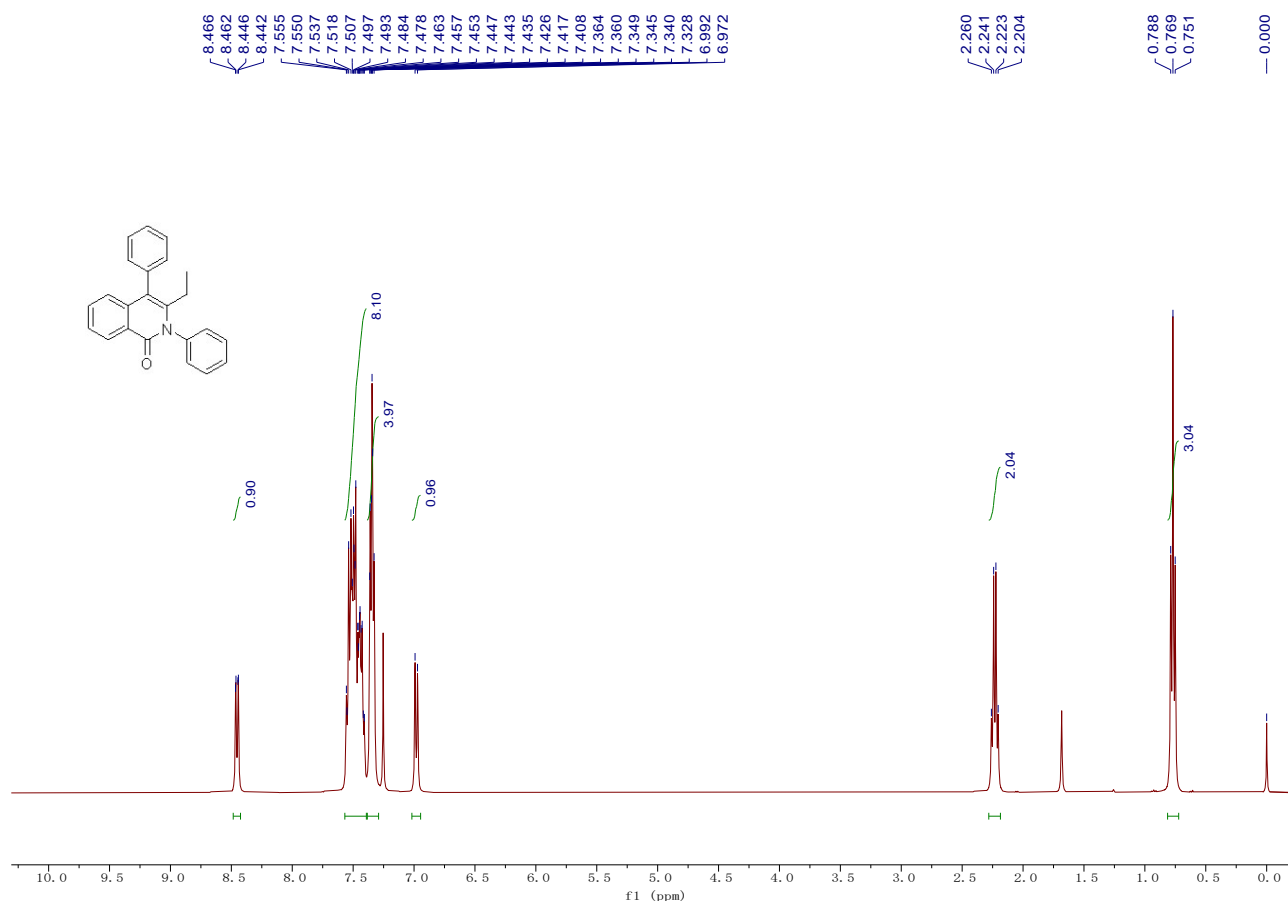

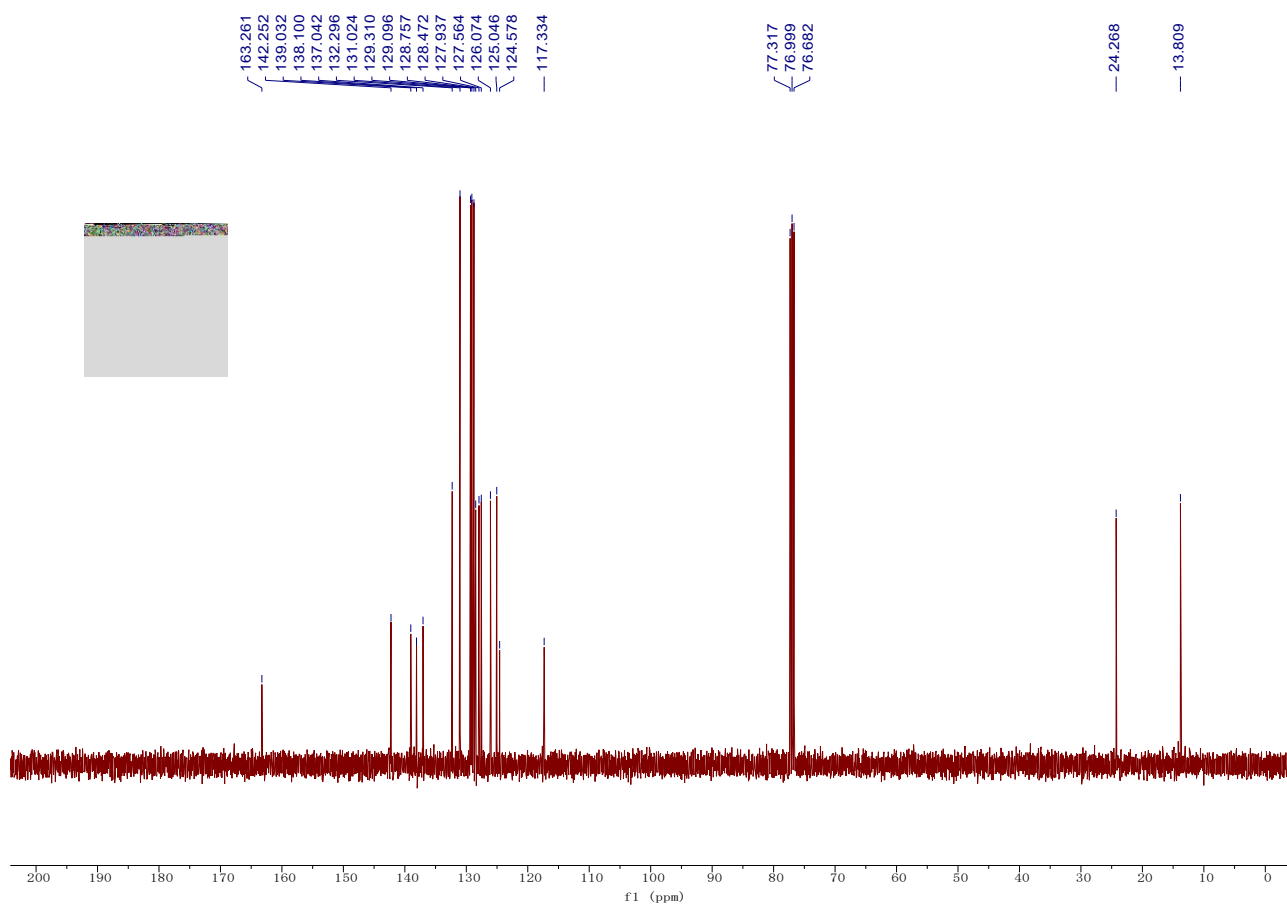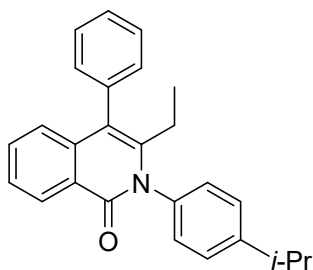

**Compound 3p:** Yield: 47.7 mg, 65%; A white solid; Mp: 176 - 178 °C; Isolated by column chromatography on silica gel (PE/EtOAc = 10:1,  $R_f$  = 0.5);  $^1\text{H}$  NMR (400 MHz, Chloroform-*d*)  $\delta$  8.45 (d,  $J$  = 7.9 Hz, 1H), 7.49 (t,  $J$  = 7.6 Hz, 3H), 7.46 – 7.39 (m, 2H), 7.39 – 7.31 (m, 4H), 7.26 – 7.22 (m, 2H), 6.97 (d,  $J$  = 8.1 Hz, 1H), 2.99 (hept,  $J$  = 6.9 Hz, 1H), 2.24 (q,  $J$  = 7.4 Hz, 2H), 1.31 (d,  $J$  = 6.9 Hz, 6H), 0.77 (t,  $J$  = 7.4 Hz, 3H);  $^{13}\text{C}$  NMR (100 MHz, Chloroform-*d*)  $\delta$  163.4, 149.0, 142.6, 138.1, 137.2, 136.5, 132.2, 131.1, 128.7, 128.0, 127.5, 127.3, 126.0, 125.0, 124.6, 117.2, 33.8, 24.3, 23.9, 13.9; IR (neat):  $\nu$  2917, 2852, 1653, 1331, 810, 776, 703  $\text{cm}^{-1}$ ; HRMS (ESI+) Calcd. for  $\text{C}_{26}\text{H}_{26}\text{NO}$   $[\text{M}+\text{H}]^+$ : 368.2009, found: 368.2008.

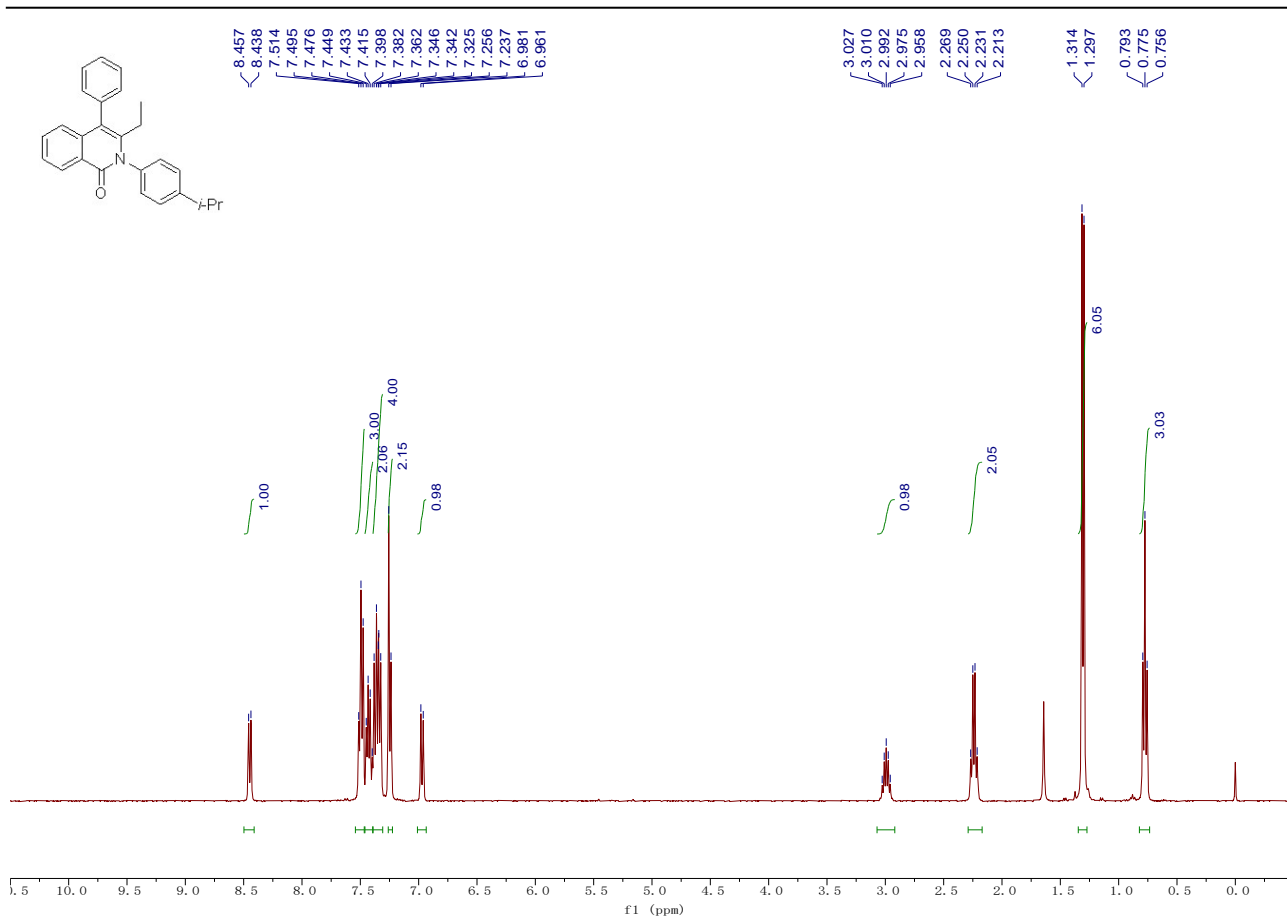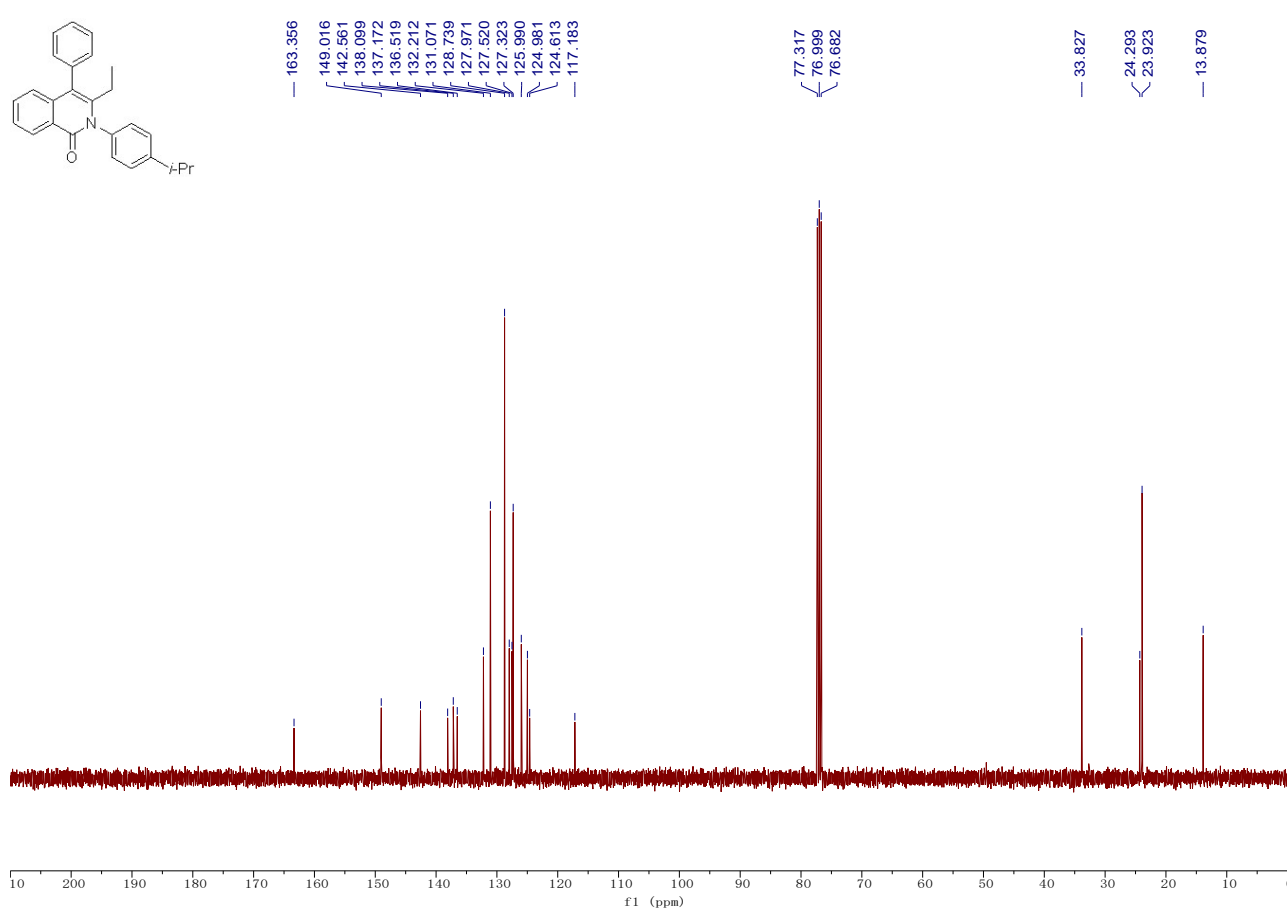

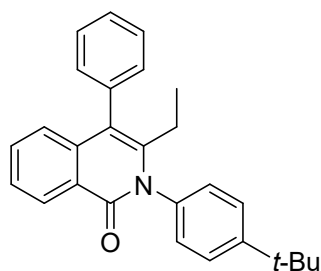

**Compound 3q:** Yield: 56.4 mg, 74%; A white solid; Mp: > 200 °C; Isolated by column chromatography on silica gel (PE/EtOAc = 10:1,  $R_f$  = 0.5);  $^1\text{H}$  NMR (400 MHz, Chloroform-*d*)  $\delta$  8.45 (dd,  $J$  = 7.9, 1.6 Hz, 1H), 7.56 – 7.46 (m, 5H), 7.46 – 7.38 (m, 2H), 7.37 – 7.31 (m, 2H), 7.28 – 7.21 (m, 2H), 6.97 (d,  $J$  = 8.2 Hz, 1H), 2.24 (q,  $J$  = 7.4 Hz, 2H), 1.37 (s, 9H), 0.78 (t,  $J$  = 7.4 Hz, 3H);  $^{13}\text{C}$  NMR (100 MHz, Chloroform-*d*)  $\delta$  163.3, 151.3, 142.5, 138.1, 137.1, 136.2, 132.2, 131.0, 128.7, 128.4, 127.9, 127.5, 126.2, 126.0, 125.0, 124.6, 117.1, 34.7, 31.3, 24.3, 13.9; IR (neat):  $\nu$  2959, 1650, 1591, 1329, 784, 704  $\text{cm}^{-1}$ ; HRMS (ESI+) Calcd. for  $\text{C}_{27}\text{H}_{28}\text{NO}$   $[\text{M}+\text{H}]^+$ : 382.2165, found: 382.2159.

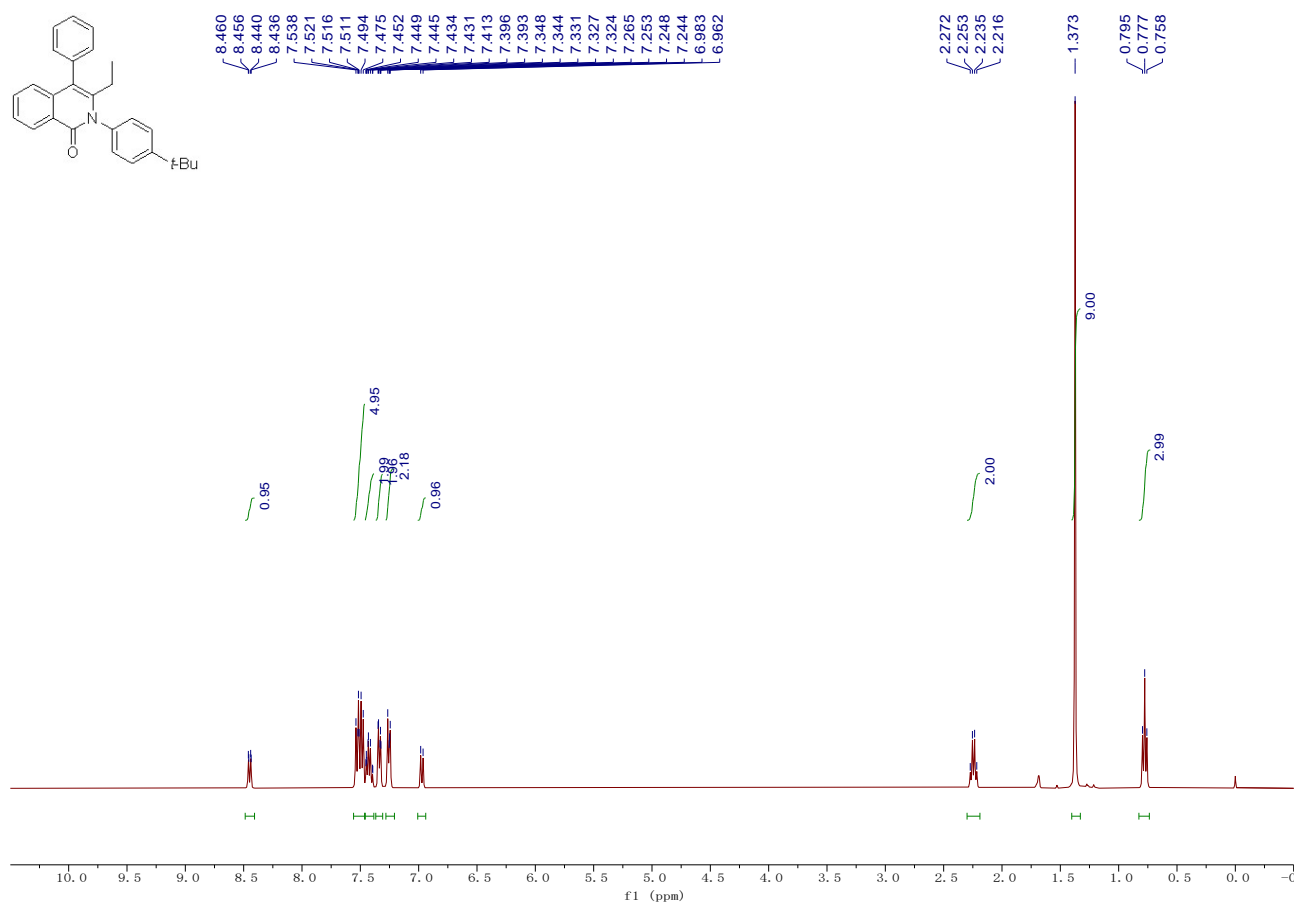

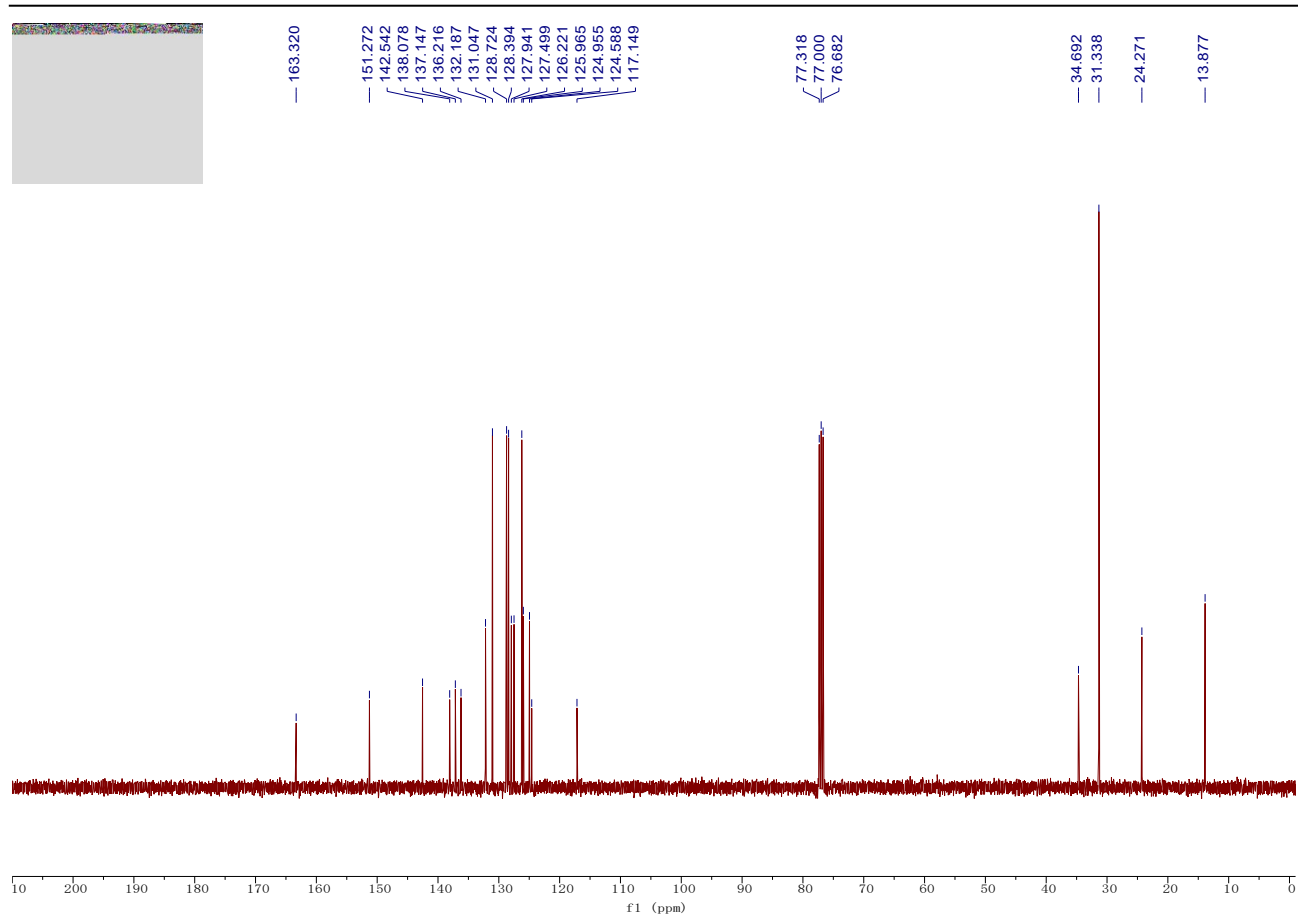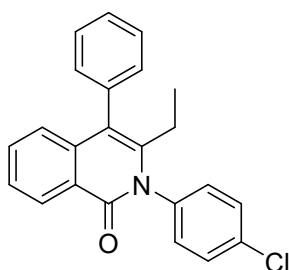

**Compound 3r:** Yield: 30.2 mg, 42%; A white solid; Mp: > 200 °C; Isolated by column chromatography on silica gel (PE/EtOAc = 8:1,  $R_f$  = 0.3);  $^1\text{H}$  NMR (400 MHz, Chloroform-*d*)  $\delta$  8.44 (d,  $J$  = 8.0 Hz, 1H), 7.56 – 7.47 (m, 5H), 7.47 – 7.40 (m, 2H), 7.31 (t,  $J$  = 8.8 Hz, 4H), 6.98 (d,  $J$  = 8.1 Hz, 1H), 2.23 (q,  $J$  = 7.4 Hz, 2H), 0.77 (t,  $J$  = 7.4 Hz, 3H);  $^{13}\text{C}$  NMR (100 MHz, Chloroform-*d*)  $\delta$  163.2, 141.8, 138.1, 137.5, 136.8, 134.4, 132.5, 130.9, 130.5, 129.6, 128.8, 127.9, 127.7, 126.3, 125.2, 124.4, 117.6, 24.2, 13.8; IR (neat):  $\nu$  1654, 1491, 1327, 1089, 776, 764, 702  $\text{cm}^{-1}$ ; HRMS (ESI+) Calcd. for  $\text{C}_{23}\text{H}_{19}\text{NOCl}$   $[\text{M}+\text{H}]^+$ : 360.1150, found: 360.1149.

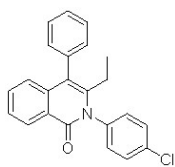

8.445  
8.425  
7.533  
7.518  
7.498  
7.480  
7.460  
7.440  
7.433  
7.414  
7.331  
7.309  
7.287  
6.990  
6.970

2.255  
2.237  
2.218  
2.200

0.792  
0.773  
0.755

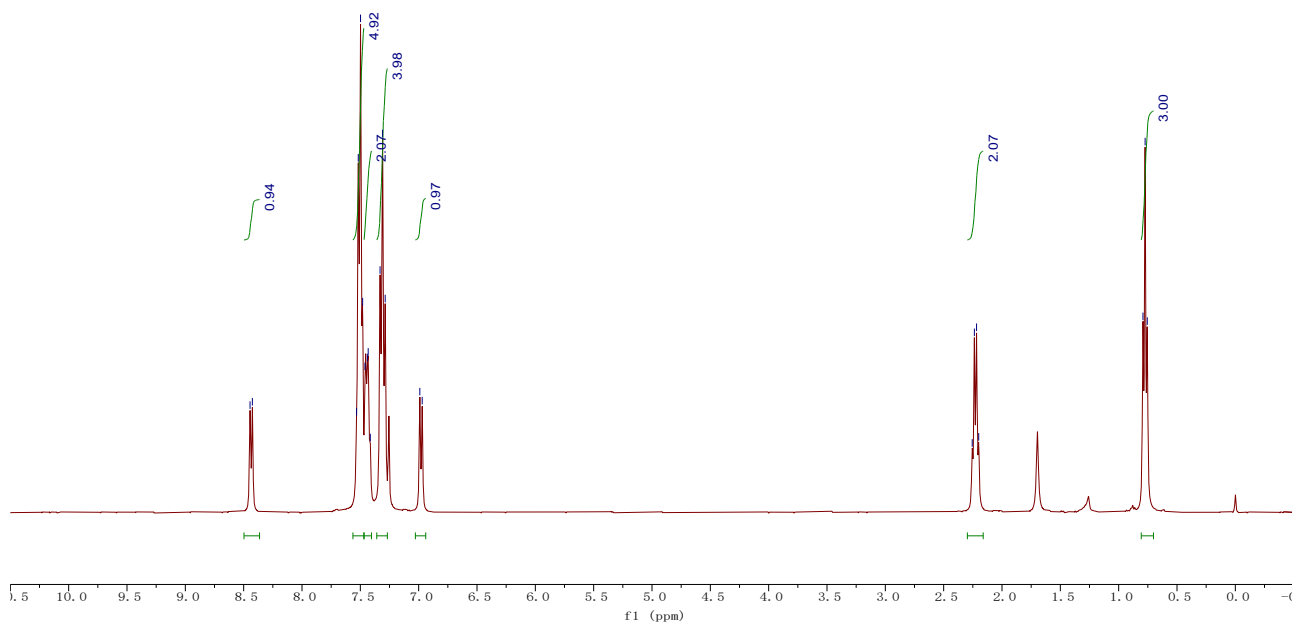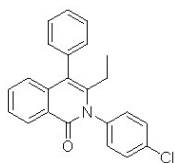

163.209  
141.821  
138.058  
137.510  
136.815  
134.437  
132.488  
130.935  
130.520  
129.593  
128.807  
127.917  
127.669  
126.263  
125.157  
124.434  
117.642

77.318  
77.000  
76.682

24.211

13.781

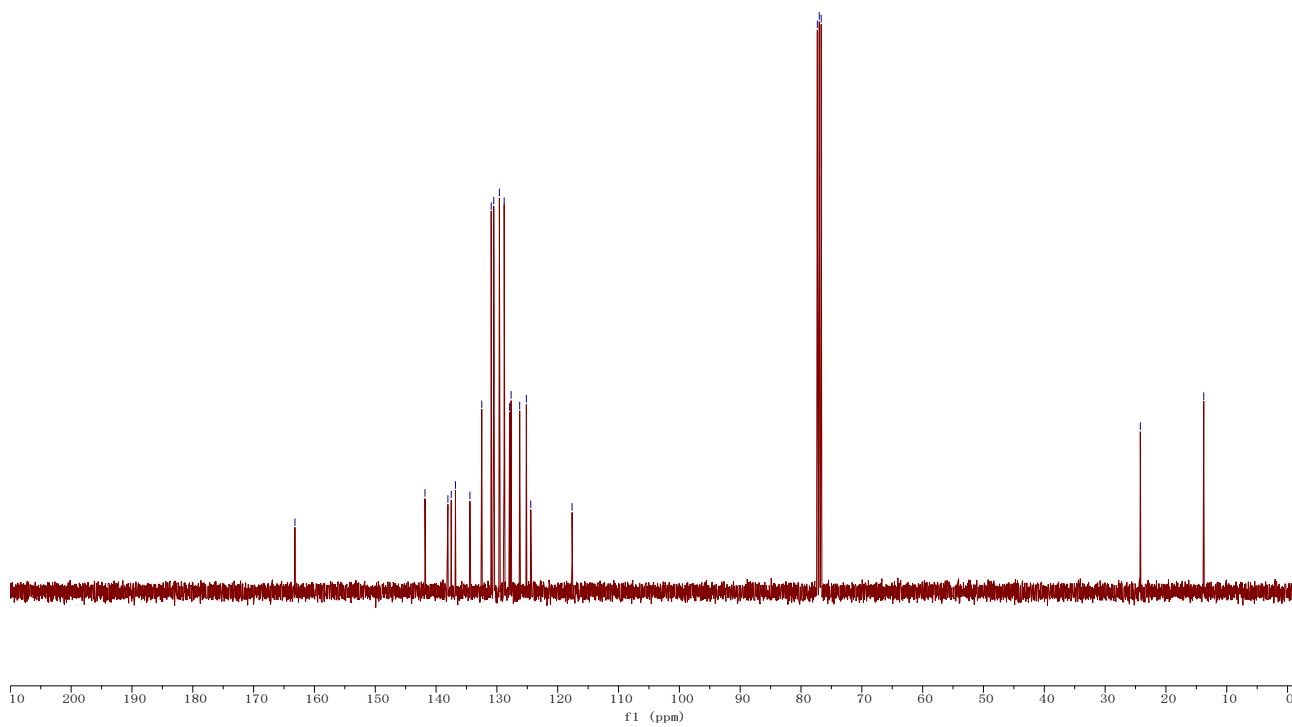

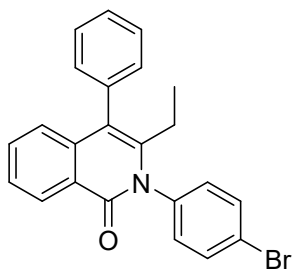

**Compound 3s:** Yield: 60.6 mg, 75%; A white solid; Mp: > 200 °C; Isolated by column chromatography on silica gel (PE/EtOAc = 4:1,  $R_f$  = 0.5);  $^1\text{H}$  NMR (400 MHz, Chloroform-*d*)  $\delta$  8.43 (d,  $J$  = 8.0 Hz, 1H), 7.66 (d,  $J$  = 8.2 Hz, 2H), 7.55 – 7.47 (m, 3H), 7.47 – 7.40 (m, 2H), 7.36 – 7.29 (m, 2H), 7.26 – 7.20 (m, 2H), 6.98 (d,  $J$  = 8.0 Hz, 1H), 2.23 (q,  $J$  = 7.4 Hz, 2H), 0.77 (t,  $J$  = 7.4 Hz, 3H);  $^{13}\text{C}$  NMR (100 MHz, Chloroform-*d*)  $\delta$  163.1, 141.7, 138.0, 136.8, 132.6, 132.5, 130.92, 130.86, 128.8, 127.9, 127.7, 126.2, 125.1, 124.4, 122.5, 117.6, 24.2, 13.8; IR (neat):  $\nu$  1655, 1488, 1013, 776, 765, 702  $\text{cm}^{-1}$ ; HRMS (ESI+) Calcd. for  $\text{C}_{23}\text{H}_{19}\text{NOBr}$   $[\text{M}+\text{H}]^+$ : 404.0645, found: 404.0647.

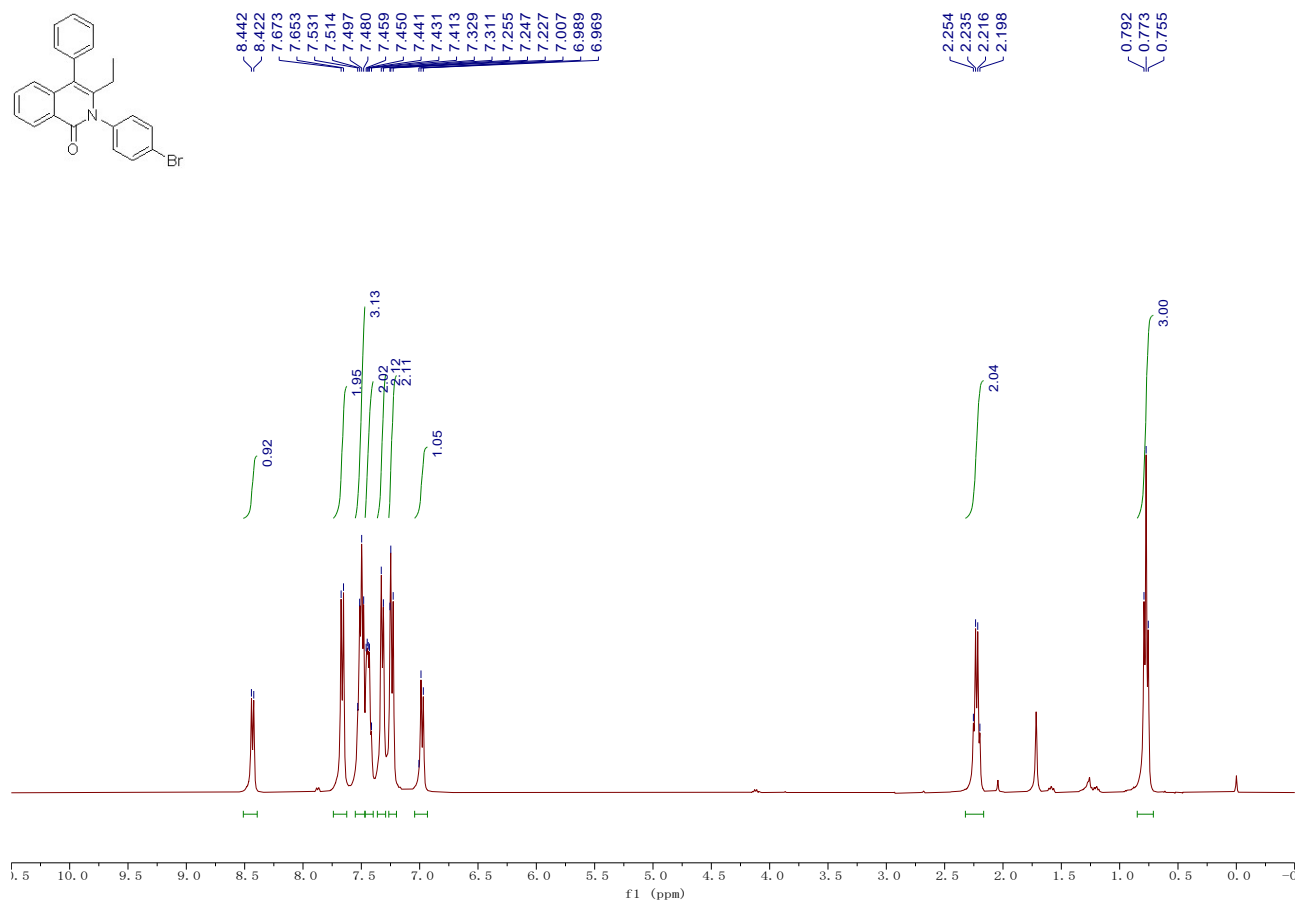

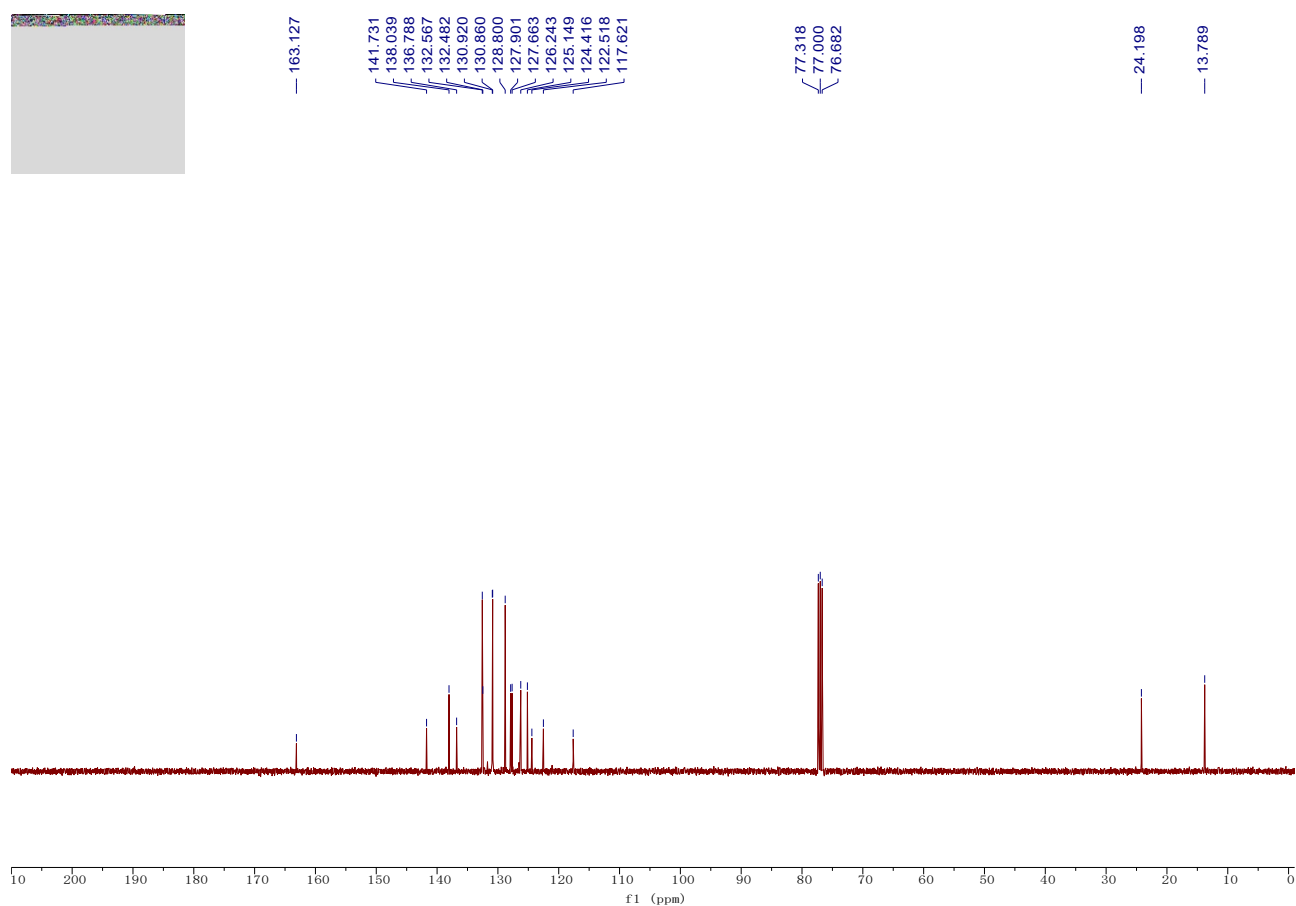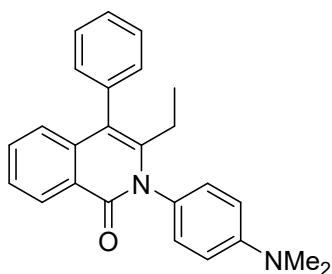

**Compound 3t:** Yield: 72.9 mg, 99%; A white solid; Mp: > 200 °C; Isolated by column chromatography on silica gel (PE/EtOAc = 4:1,  $R_f$  = 0.4);  $^1\text{H}$  NMR (400 MHz, Chloroform-*d*)  $\delta$  8.46 (d,  $J$  = 8.0 Hz, 1H), 7.57 – 7.36 (m, 5H), 7.33 (d,  $J$  = 7.3 Hz, 2H), 7.17 (d,  $J$  = 8.3 Hz, 2H), 6.96 (d,  $J$  = 8.1 Hz, 1H), 6.82 (d,  $J$  = 8.3 Hz, 2H), 3.01 (s, 6H), 2.27 (q,  $J$  = 7.4 Hz, 2H), 0.80 (t,  $J$  = 7.4 Hz, 3H);  $^{13}\text{C}$  NMR (100 MHz, Chloroform-*d*)  $\delta$  163.7, 150.0, 143.3, 138.0, 137.3, 132.0, 131.0, 129.3, 128.7, 128.0, 127.4, 125.8, 124.8, 124.6, 116.9, 112.5, 40.5, 24.4, 13.9; IR (neat):  $\nu$  1645, 1611, 1520, 1443, 1330, 1181, 806, 770, 703  $\text{cm}^{-1}$ ; HRMS (ESI+) Calcd. for  $\text{C}_{25}\text{H}_{25}\text{N}_2\text{O}$   $[\text{M}+\text{H}]^+$ : 369.1961, found: 369.1967.



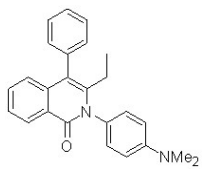

8.467  
8.447  
7.498  
7.480  
7.462  
7.436  
7.416  
7.396  
7.377  
7.357  
7.319  
7.176  
7.155  
6.968  
6.948  
6.827  
6.806

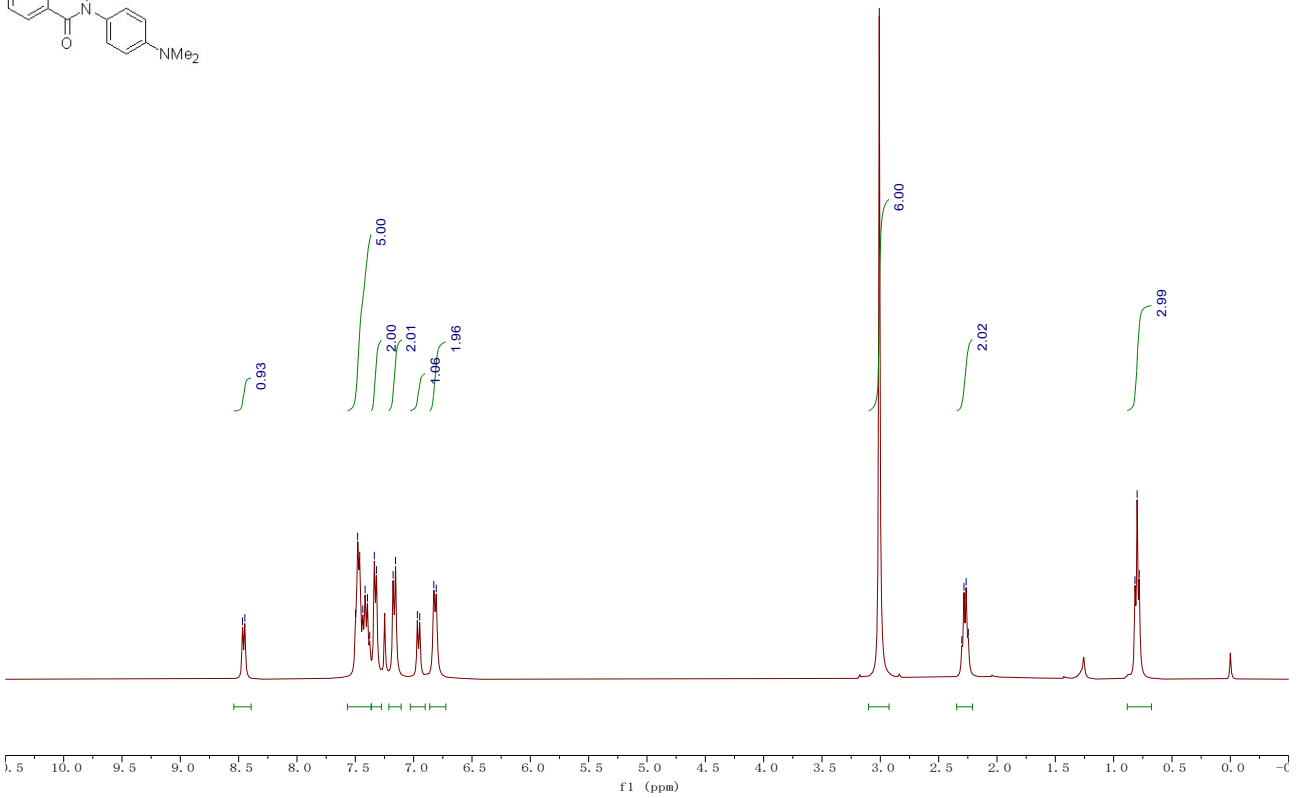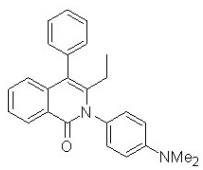

163.671  
150.029  
143.265  
138.029  
137.317  
132.013  
131.048  
129.301  
128.660  
127.988  
127.395  
125.769  
124.849  
124.600  
116.891  
112.545

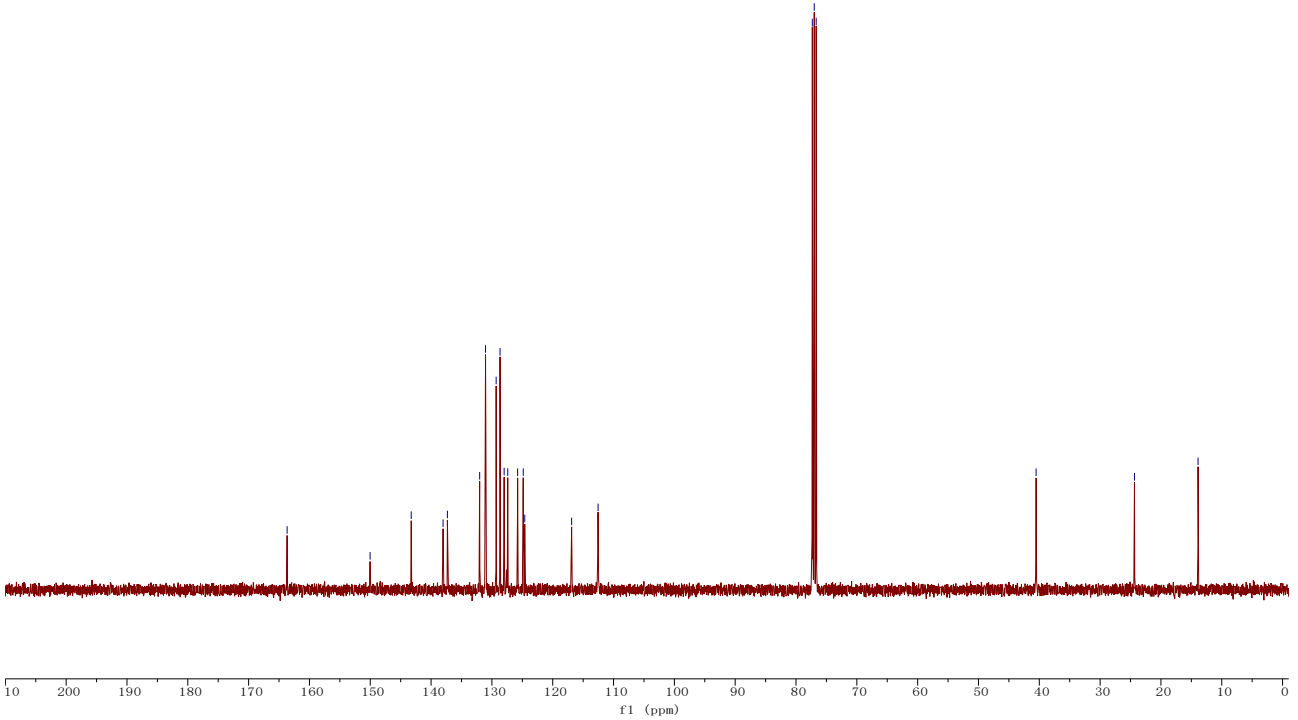

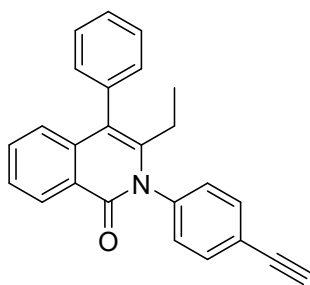

**Compound 3v:** Yield: 39.8 mg, 57%; A white solid; Mp: > 200 °C; Isolated by column chromatography on silica gel (PE/EtOAc = 4:1,  $R_f$  = 0.5);  $^1\text{H}$  NMR (400 MHz, Chloroform-*d*)  $\delta$  8.44 (d,  $J$  = 8.0 Hz, 1H), 7.66 (d,  $J$  = 7.9 Hz, 2H), 7.56 – 7.40 (m, 5H), 7.36 – 7.28 (m, 4H), 6.98 (d,  $J$  = 8.2 Hz, 1H), 3.15 (s, 1H), 2.22 (q,  $J$  = 7.4 Hz, 2H), 0.76 (t,  $J$  = 7.4 Hz, 3H);  $^{13}\text{C}$  NMR (100 MHz, Chloroform-*d*)  $\delta$  163.1, 141.8, 139.4, 138.1, 136.8, 133.1, 132.5, 131.0, 129.3, 128.8, 127.9, 127.7, 126.2, 125.2, 124.5, 122.5, 117.6, 82.8, 78.4, 24.2, 13.8; IR (neat):  $\nu$  3251, 1650, 1612, 1586, 1331, 816, 772, 702  $\text{cm}^{-1}$ ; HRMS (ESI+) Calcd. for  $\text{C}_{25}\text{H}_{20}\text{NO}$   $[\text{M}+\text{H}]^+$ : 350.1539, found: 350.1543.

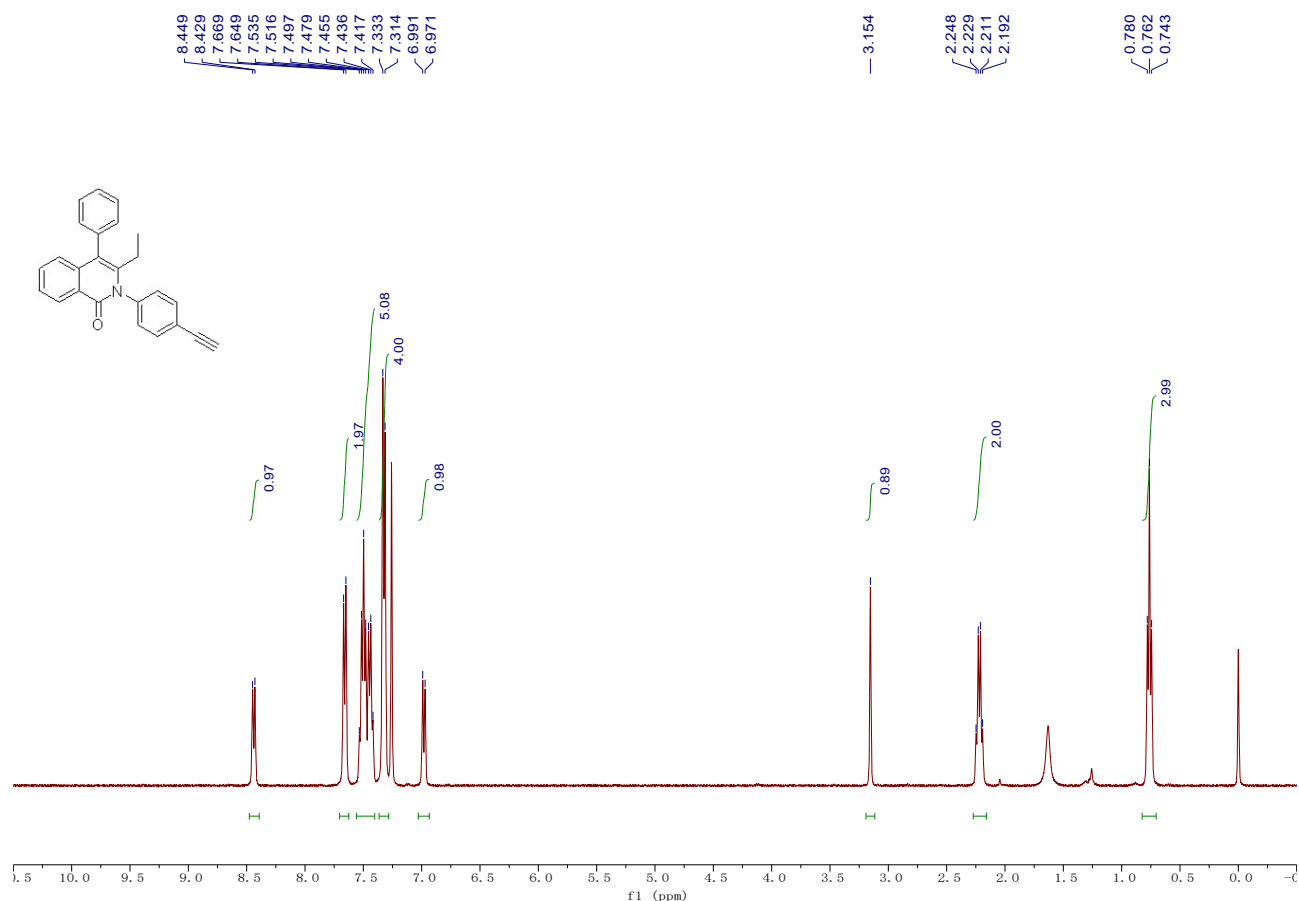

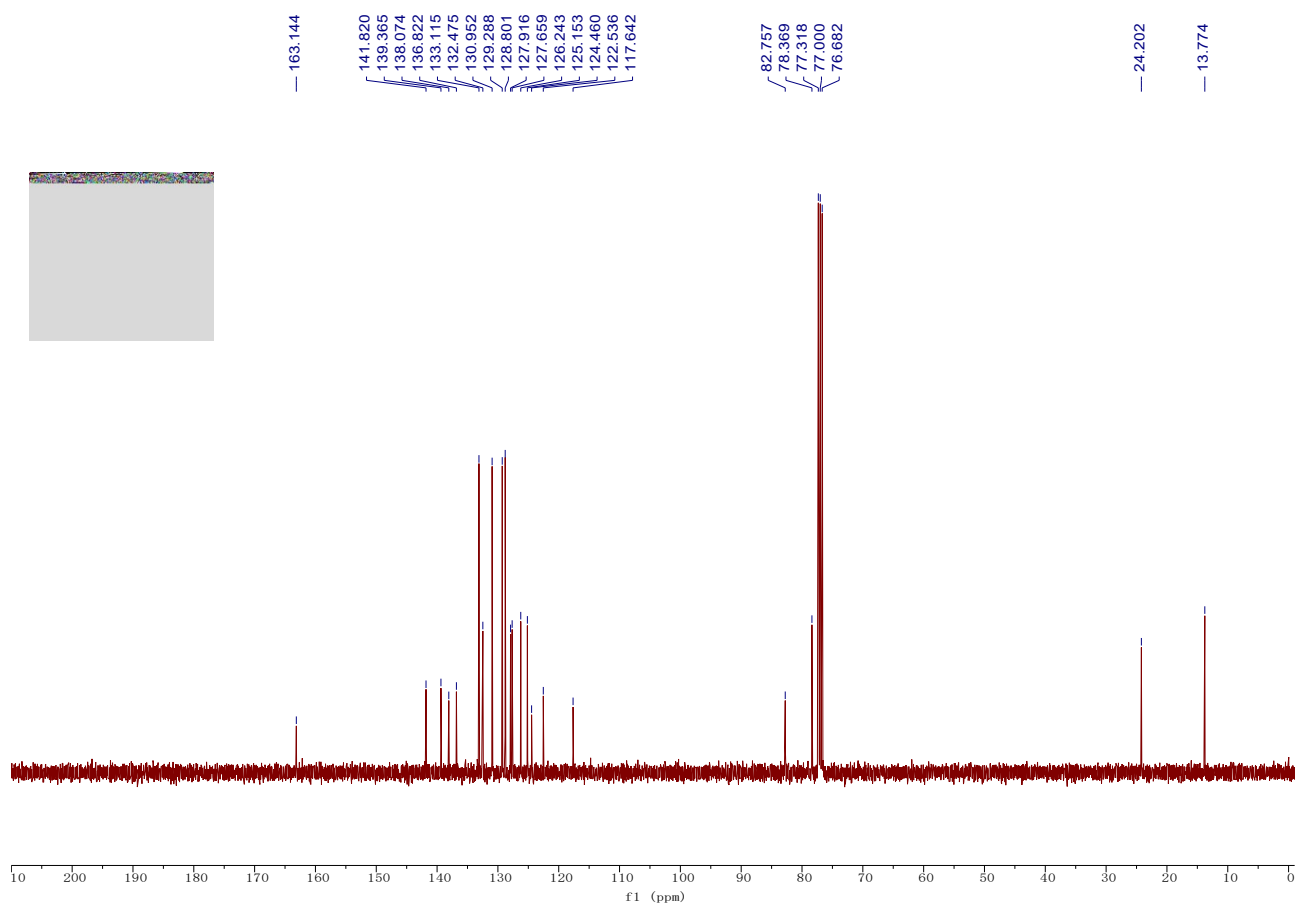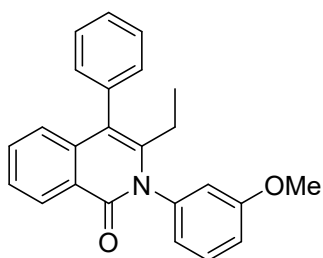

**Compound 3w:** Yield: 44.0 mg, 62%; A white solid; Mp: 139 - 141 °C; Isolated by column chromatography on silica gel (PE/EtOAc = 4:1,  $R_f$  = 0.4);  $^1\text{H}$  NMR (400 MHz, Chloroform-*d*)  $\delta$  8.45 (d,  $J$  = 8.0 Hz, 1H), 7.59 – 7.39 (m, 6H), 7.38 – 7.28 (m, 2H), 7.10 – 6.83 (m, 4H), 3.84 (s, 3H), 2.39 – 2.16 (m, 2H), 0.82 (t,  $J$  = 7.6 Hz, 3H);  $^{13}\text{C}$  NMR (100 MHz, Chloroform-*d*)  $\delta$  163.2, 160.3, 142.3, 140.1, 138.1, 137.0, 132.3, 131.1, 131.0, 130.0, 128.8, 127.9, 127.6, 126.1, 125.0, 124.6, 121.4, 117.4, 114.8, 114.4, 55.4, 24.3, 14.1; IR (neat):  $\nu$  1651, 1602, 1488, 1328, 1287, 1040, 773, 763, 697  $\text{cm}^{-1}$ ; HRMS (ESI+) Calcd. for  $\text{C}_{24}\text{H}_{22}\text{NO}_2$   $[\text{M}+\text{H}]^+$ : 356.1645, found: 356.1641.

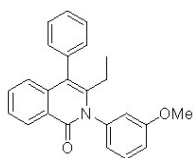

8.463  
8.443  
7.501  
7.480  
7.456  
7.435  
7.345  
7.327  
7.298  
7.023  
7.003  
6.988  
6.961  
6.935  
6.884

3.843

2.265  
2.246  
2.228

0.828  
0.809  
0.790

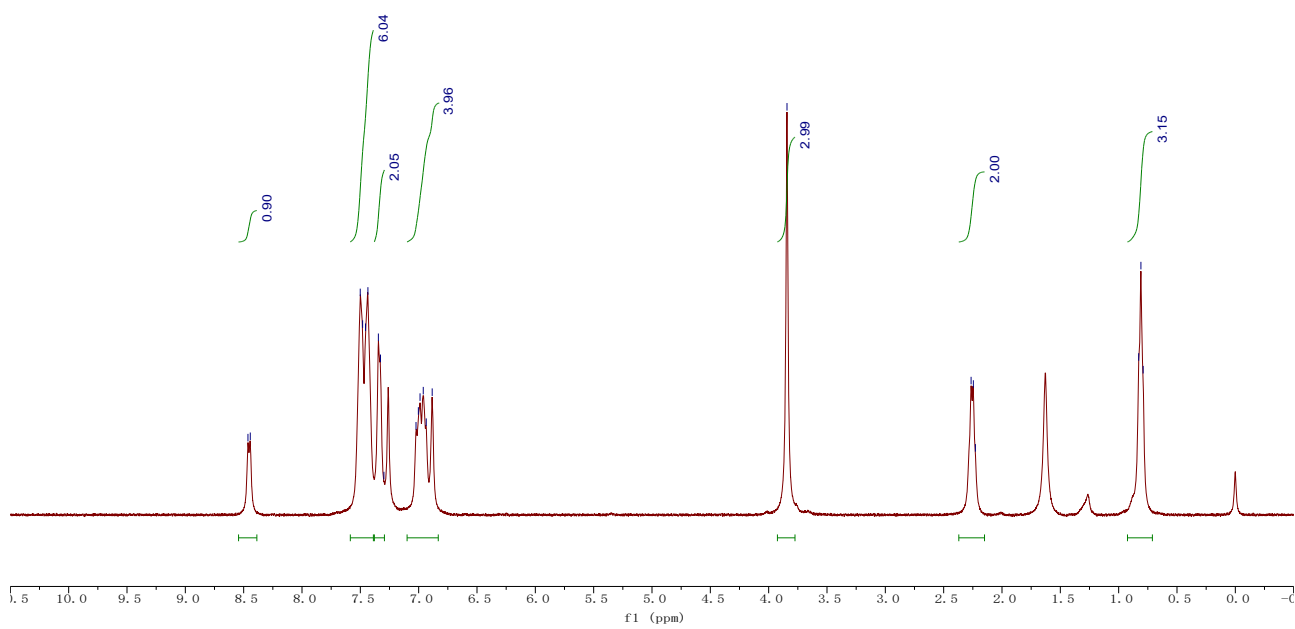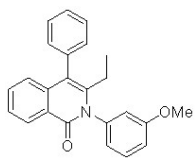

163.181  
160.311  
142.271  
140.091  
138.099  
137.015  
132.321  
131.062  
131.037  
129.980  
128.766  
127.946  
127.581  
126.090  
125.031  
124.557  
121.353  
117.380  
114.753  
114.398

77.318  
77.000  
76.683

55.419

24.269

14.148

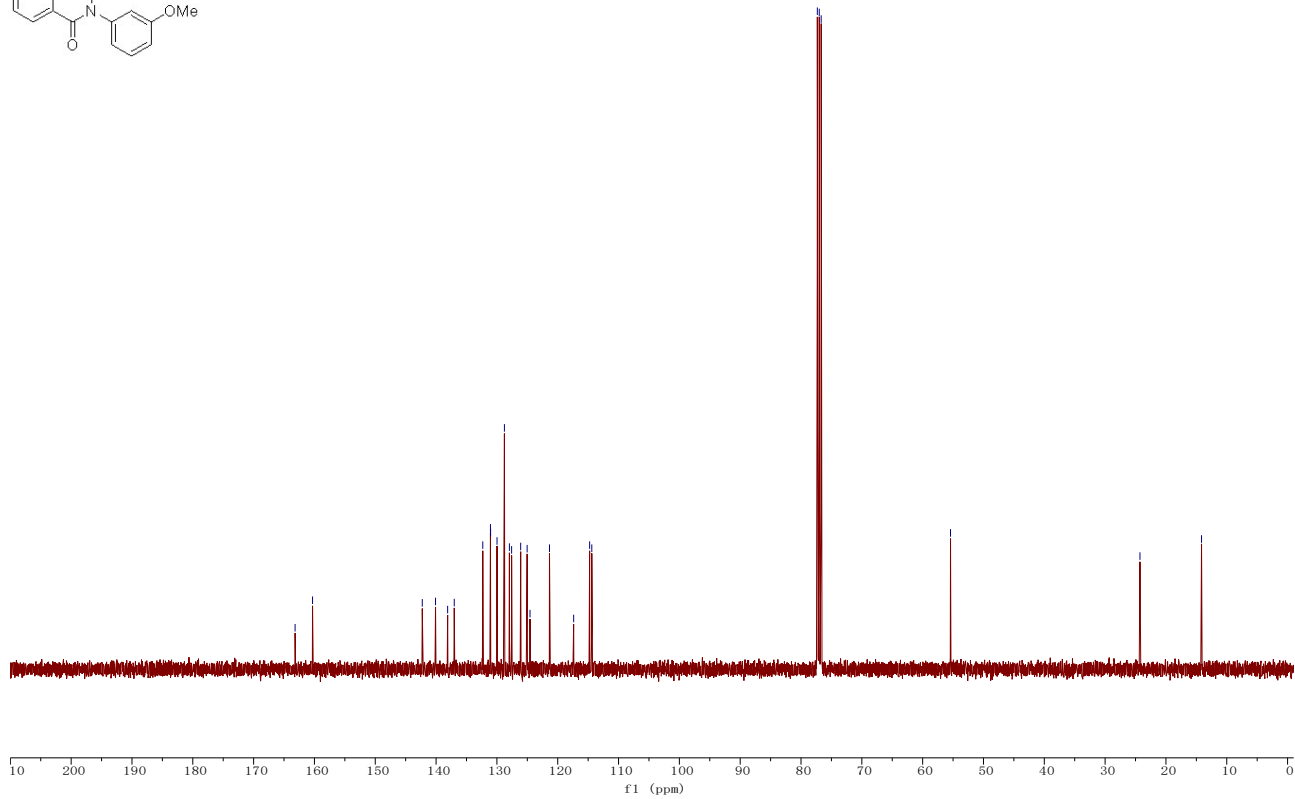

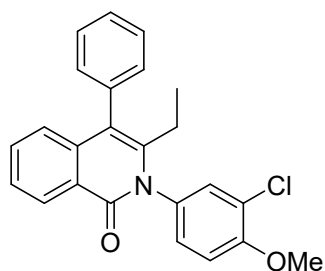

**Compound 3x:** Yield: 46.7 mg, 60%; A white solid; Mp: > 200 °C; Isolated by column chromatography on silica gel (PE/EtOAc = 4:1,  $R_f = 0.4$ );  $^1\text{H NMR}$  (400 MHz, Chloroform- $d$ )  $\delta$  8.44 (d,  $J = 7.9$  Hz, 1H), 7.55 – 7.39 (m, 5H), 7.41 – 7.36 (m, 1H), 7.36 – 7.29 (m, 2H), 7.28 – 7.21 (m, 1H), 7.07 (d,  $J = 8.7$  Hz, 1H), 6.97 (d,  $J = 8.1$  Hz, 1H), 3.97 (s, 3H), 2.25 (q,  $J = 7.5$  Hz, 2H), 0.80 (t,  $J = 7.5$  Hz, 3H);  $^{13}\text{C NMR}$  (100 MHz, Chloroform- $d$ )  $\delta$  163.4, 155.0, 142.2, 138.0, 136.9, 132.4, 131.8, 130.8, 128.8, 128.7, 128.5, 127.9, 127.6, 126.2, 125.1, 124.4, 122.9, 117.5, 112.0, 56.3, 24.3, 13.8; IR (neat):  $\nu$  1656, 1586, 1496, 1263, 1059, 814, 703  $\text{cm}^{-1}$ ; HRMS (ESI+) Calcd. for  $\text{C}_{24}\text{H}_{21}\text{NO}_2\text{Cl}$   $[\text{M}+\text{H}]^+$ : 390.1255, found: 390.1257.

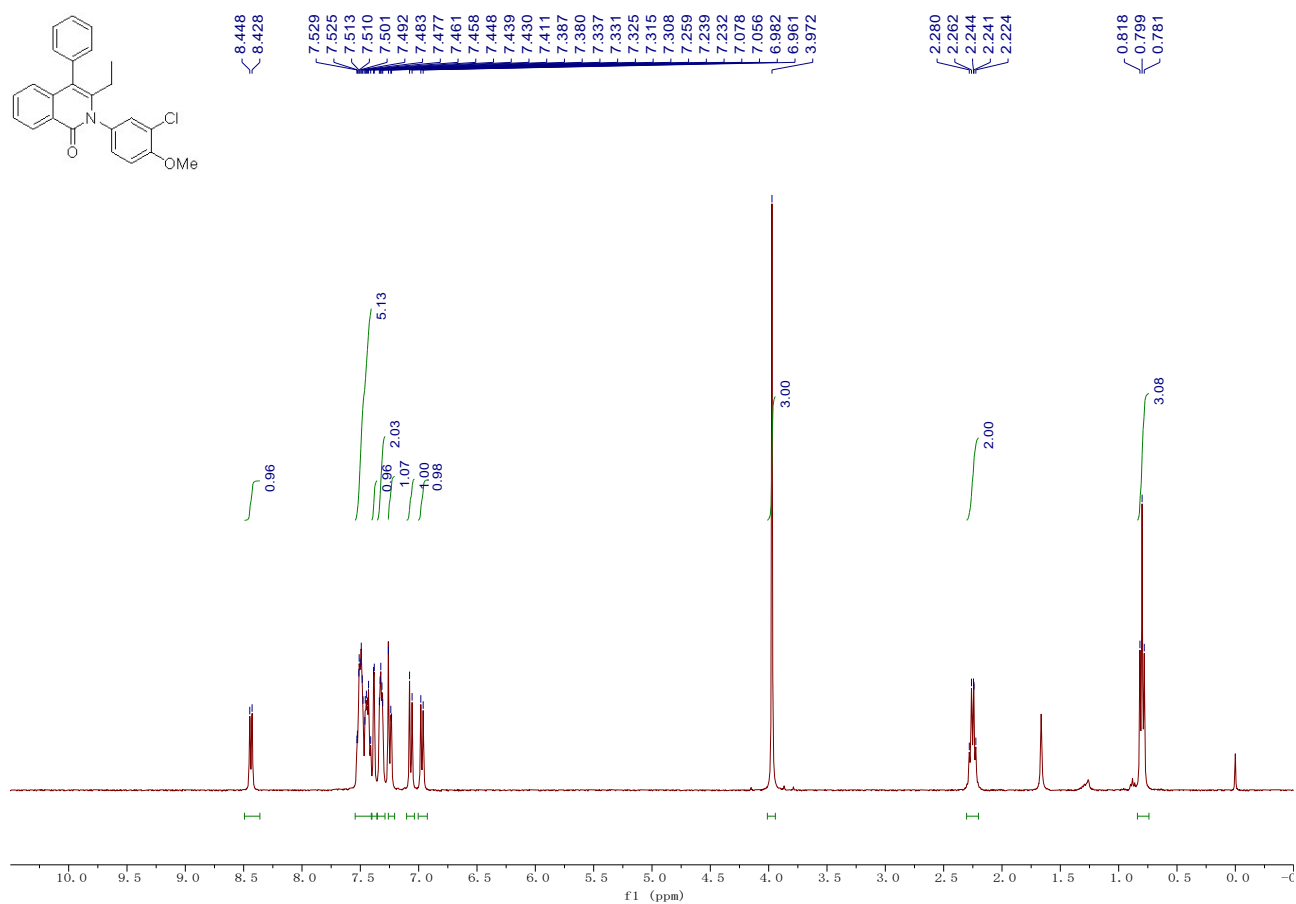

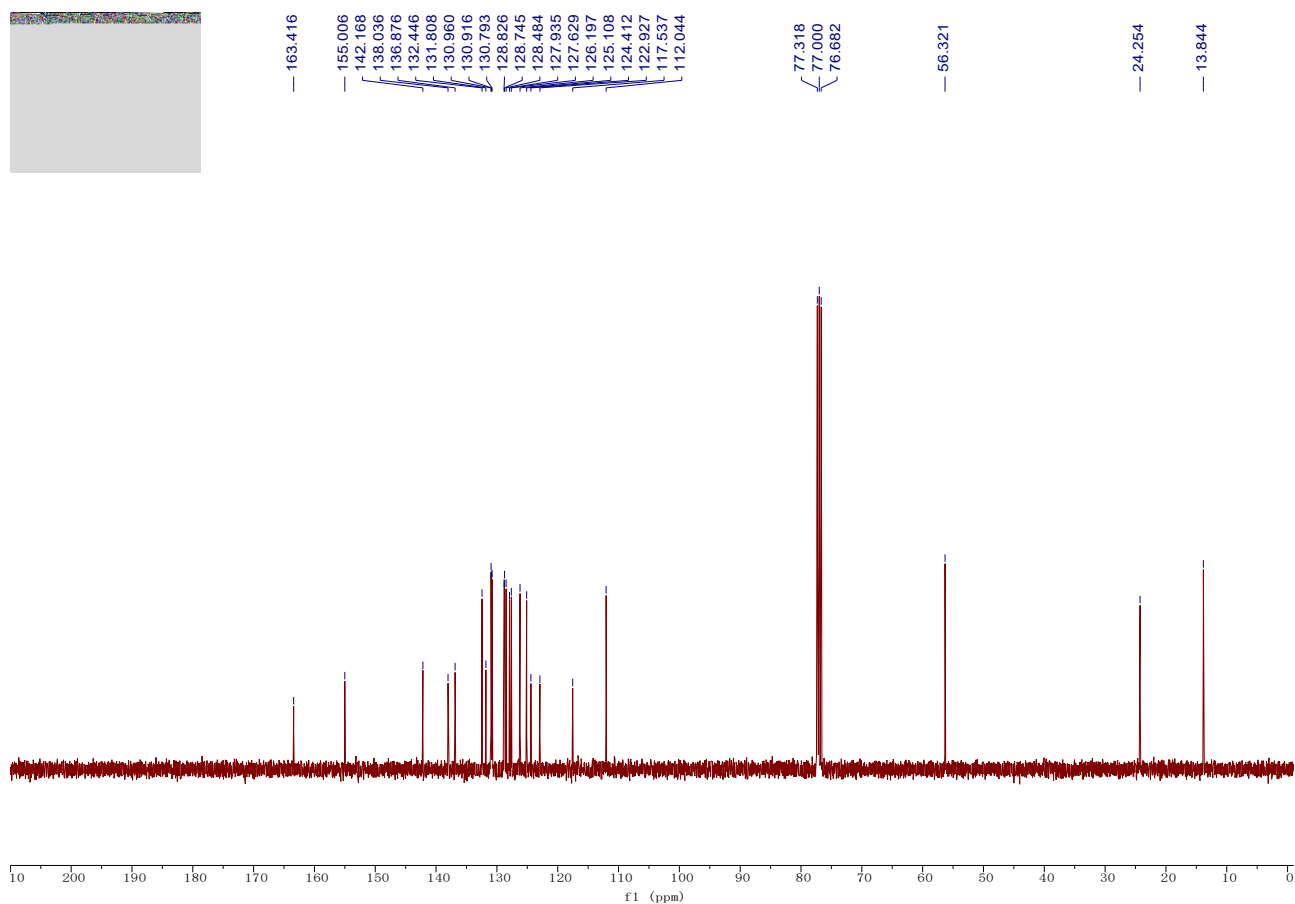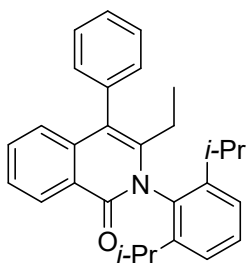

**Compound 3y:** Yield: 55.6 mg, 68%; A white solid; Mp: > 200 °C; Isolated by column chromatography on silica gel (PE/EtOAc = 10:1,  $R_f$  = 0.4);  $^1\text{H}$  NMR (400 MHz, Chloroform-*d*)  $\delta$  8.47 (dd,  $J$  = 8.0, 1.5 Hz, 1H), 7.56 – 7.46 (m, 3H), 7.48 – 7.38 (m, 3H), 7.39 – 7.32 (m, 2H), 7.30 (d,  $J$  = 7.7 Hz, 2H), 7.02 (d,  $J$  = 8.1 Hz, 1H), 2.66 (hept,  $J$  = 6.8 Hz, 2H), 2.17 (q,  $J$  = 7.5 Hz, 2H), 1.24 (d,  $J$  = 6.8 Hz, 6H), 1.17 (d,  $J$  = 6.8 Hz, 6H), 0.68 (t,  $J$  = 7.5 Hz, 3H);  $^{13}\text{C}$  NMR (100 MHz, Chloroform-*d*)  $\delta$  162.6, 146.0, 142.9, 138.1, 137.1, 134.6, 132.2, 131.2, 129.2, 128.8, 128.3, 127.5, 125.9, 124.84, 124.80, 124.1, 117.6, 28.9, 25.2, 24.2, 22.9, 13.4; IR (neat):  $\nu$  2966, 1649, 1609, 769, 703  $\text{cm}^{-1}$ ; HRMS (ESI+) Calcd. for  $\text{C}_{29}\text{H}_{32}\text{NO}$   $[\text{M}+\text{H}]^+$ : 410.2478, found: 410.2475.

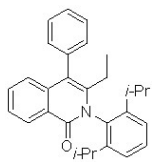

8.485  
8.482  
8.465  
8.462  
7.536  
7.532  
7.524  
7.521  
7.518  
7.515  
7.503  
7.499  
7.494  
7.484  
7.460  
7.452  
7.449  
7.441  
7.439  
7.434  
7.421  
7.404  
7.401  
7.370  
7.366  
7.353  
7.349  
7.346  
7.310  
7.291  
7.034  
7.015  
7.012

2.711  
2.694  
2.677  
2.660  
2.643  
2.626  
2.609  
2.193  
2.175  
2.156  
2.137  
1.264  
1.247  
1.230  
1.183  
1.166  
0.725  
0.703  
0.684  
0.665

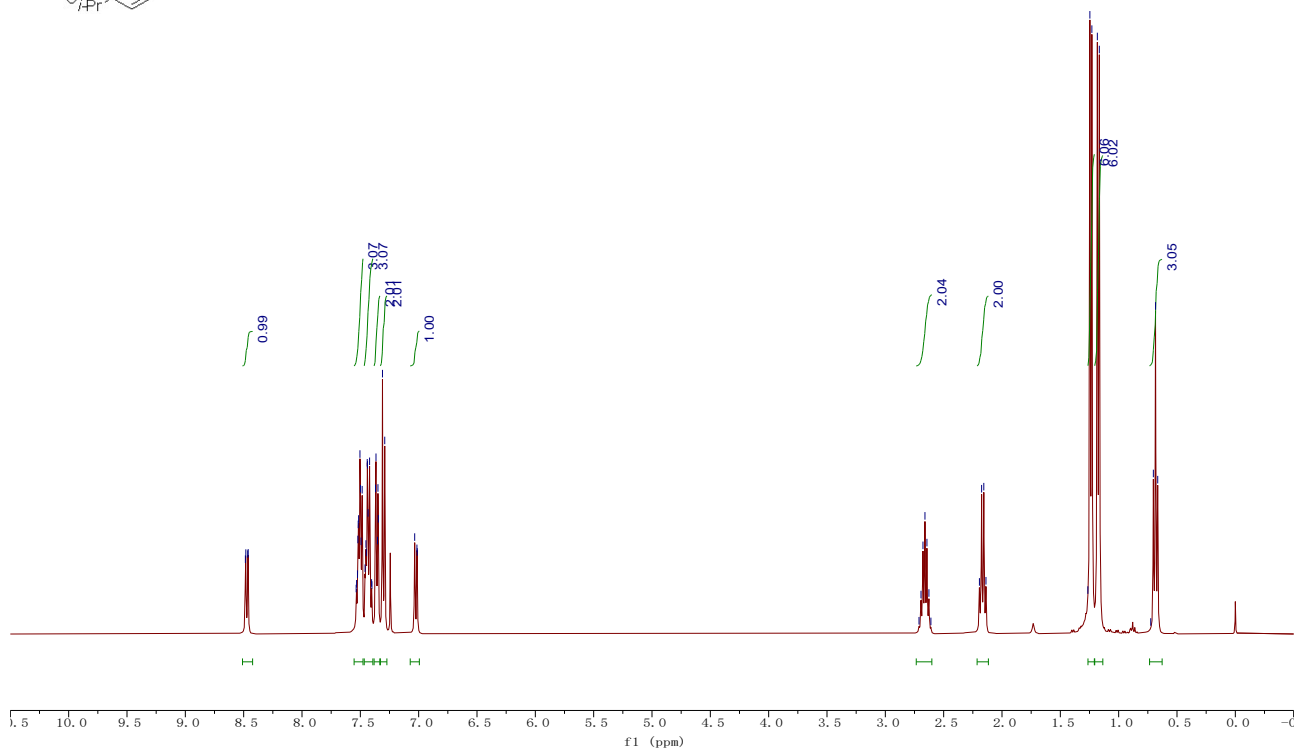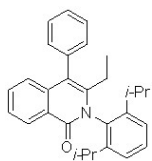

162.585  
145.986  
142.920  
138.054  
137.106  
134.607  
132.155  
131.239  
129.243  
128.761  
128.272  
127.527  
125.875  
124.839  
124.803  
124.102  
117.623

77.318  
77.000  
76.682

28.851  
25.156  
24.190  
22.897

13.397

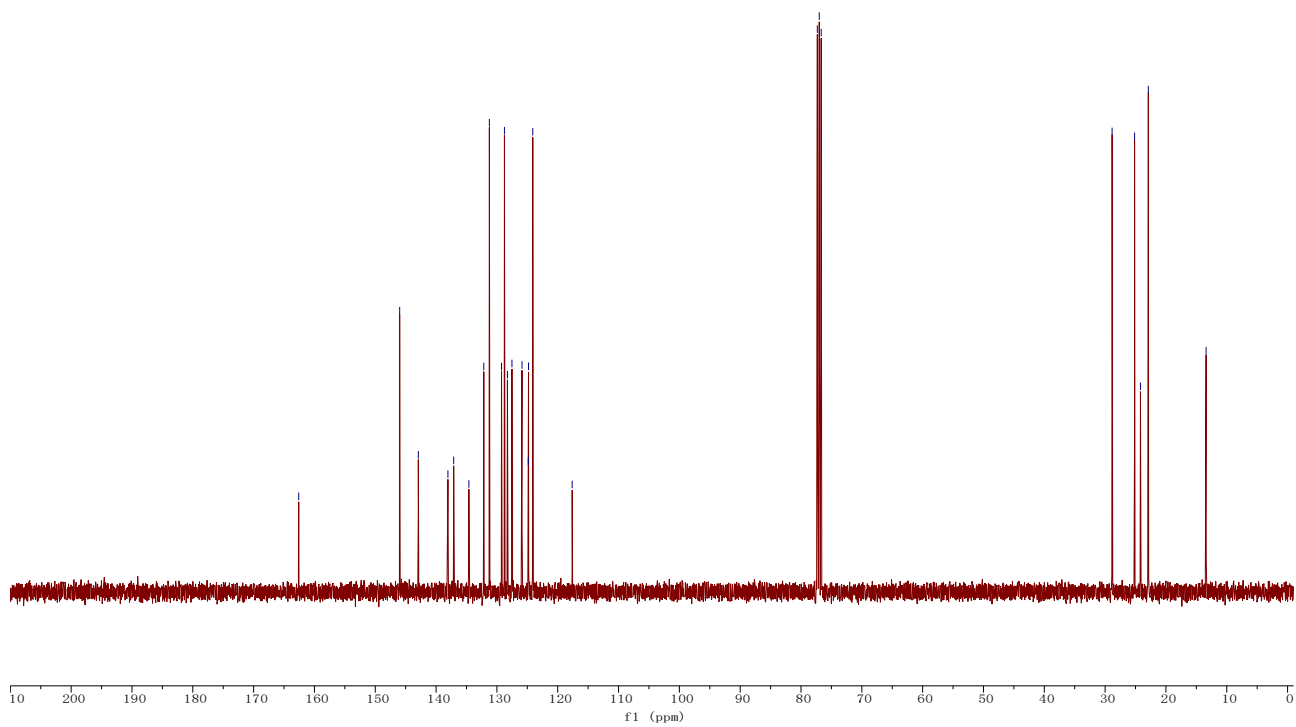

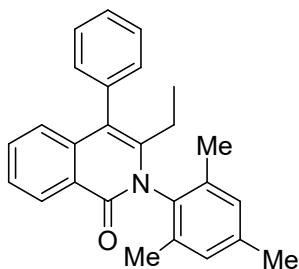

**Compound 3z:** Yield: 48.4 mg, 66%; A white solid; Mp: > 200 °C; Isolated by column chromatography on silica gel (PE/EtOAc = 10:1,  $R_f = 0.4$ );  $^1\text{H}$  NMR (400 MHz, Chloroform-*d*)  $\delta$  8.48 (d,  $J = 7.9$  Hz, 1H), 7.55 – 7.47 (m, 3H), 7.46 – 7.39 (m, 2H), 7.37 – 7.31 (m, 2H), 7.04 – 6.96 (m, 3H), 2.34 (s, 3H), 2.15 (q,  $J = 7.5$  Hz, 2H), 2.09 (s, 6H), 0.72 (t,  $J = 7.5$  Hz, 3H);  $^{13}\text{C}$  NMR (100 MHz, Chloroform-*d*)  $\delta$  161.9, 142.3, 138.2, 138.1, 137.2, 135.4, 134.7, 132.2, 131.1, 129.4, 128.8, 128.1, 127.5, 125.8, 125.0, 124.7, 118.0, 24.2, 21.1, 18.1, 13.4; IR (neat):  $\nu$  2917, 1647, 1612, 1480, 1329, 775, 704  $\text{cm}^{-1}$ ; HRMS (ESI+) Calcd. for  $\text{C}_{26}\text{H}_{26}\text{NO}$   $[\text{M}+\text{H}]^+$ : 368.2009, found: 368.2013.

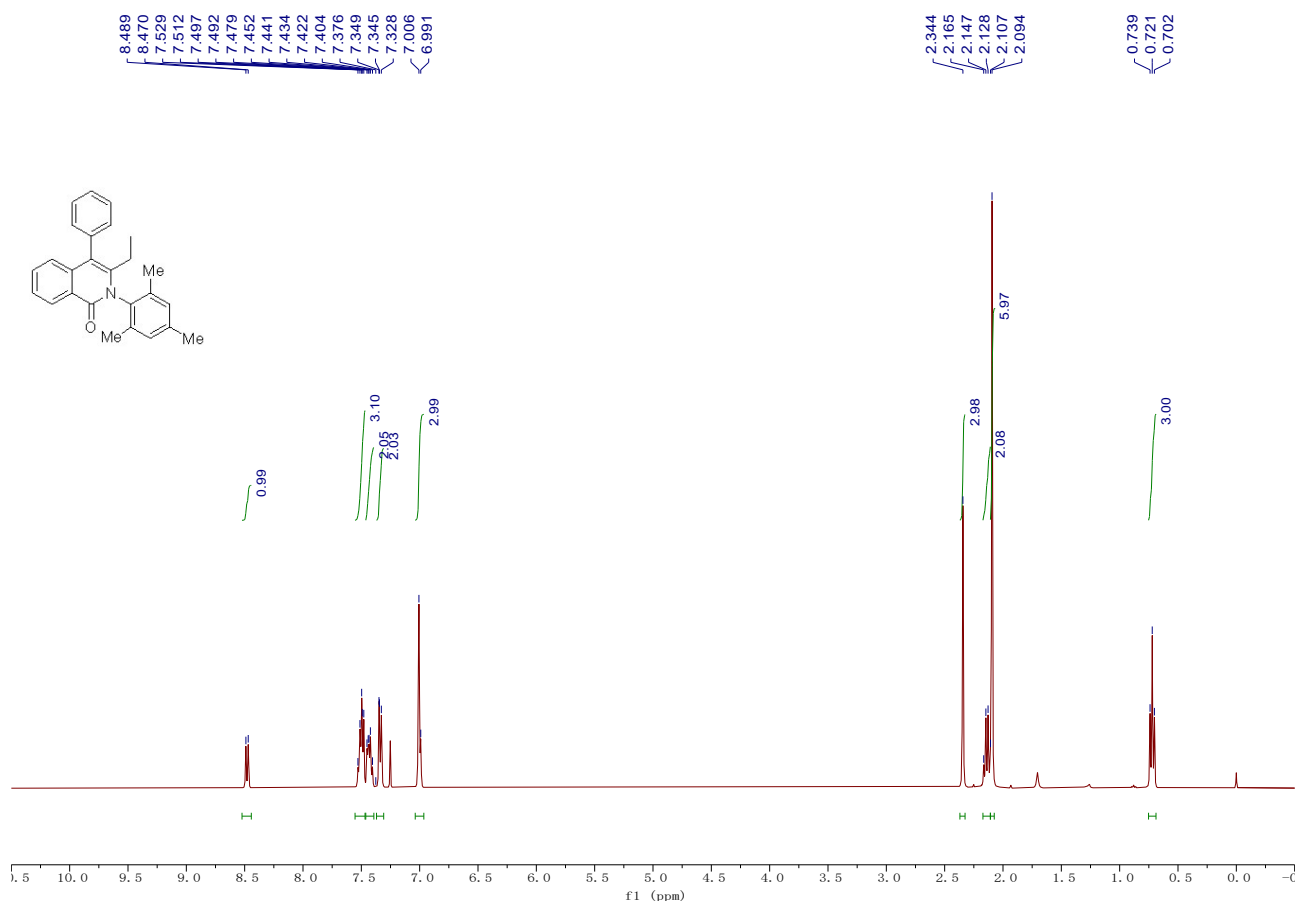



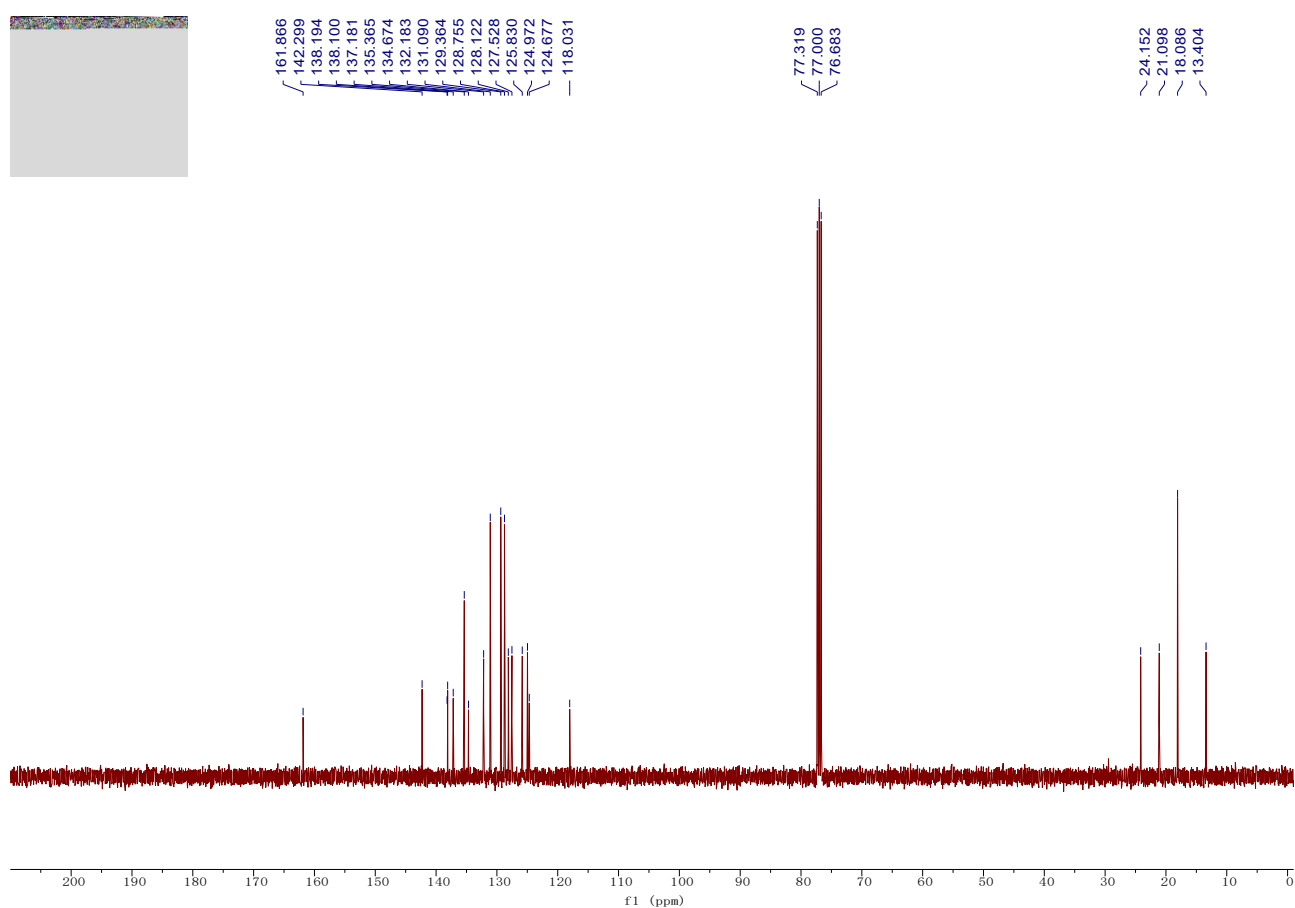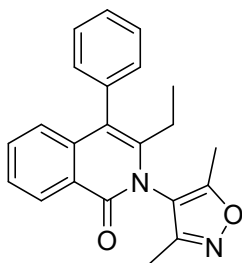

**Compound 3aa:** Yield: 35.1 mg, 51%; A white solid; Mp: 169 - 171 °C; Isolated by column chromatography on silica gel (PE/EtOAc = 10:1,  $R_f$  = 0.4);  $^1\text{H}$  NMR (400 MHz, Chloroform-*d*)  $\delta$  8.44 (dd,  $J$  = 8.0, 1.9 Hz, 1H), 7.58 – 7.42 (m, 5H), 7.34 – 7.28 (m, 2H), 7.00 (d,  $J$  = 8.1 Hz, 1H), 2.36 (s, 3H), 2.32 – 2.21 (m, 2H), 2.20 (s, 3H), 0.81 (t,  $J$  = 7.5 Hz, 3H);  $^{13}\text{C}$  NMR (100 MHz, Chloroform-*d*)  $\delta$  165.6, 162.5, 158.5, 141.9, 138.1, 136.6, 132.9, 130.75, 130.73, 128.95, 128.88, 128.1, 127.8, 126.5, 125.4, 124.1, 118.3, 116.1, 24.2, 13.4, 11.2, 9.8; IR (neat):  $\nu$  2925, 1667, 1645, 1612, 1327, 775, 703  $\text{cm}^{-1}$ ; HRMS (ESI+) Calcd. for  $\text{C}_{22}\text{H}_{21}\text{N}_2\text{O}_2$   $[\text{M}+\text{H}]^+$ : 345.1598, found: 345.1598.

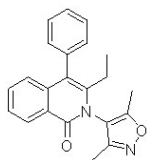

8.448  
8.443  
8.428  
8.423  
7.568  
7.565  
7.561  
7.550  
7.547  
7.543  
7.530  
7.526  
7.514  
7.510  
7.494  
7.479  
7.474  
7.460  
7.446  
7.443  
7.439  
7.320  
7.316  
7.313  
7.303  
7.300  
7.286  
7.009  
6.988

2.363  
2.360  
2.356  
2.300  
2.282  
2.264  
2.258  
2.242  
2.238  
2.219  
2.199  
2.195  
2.191  
0.824  
0.806  
0.787

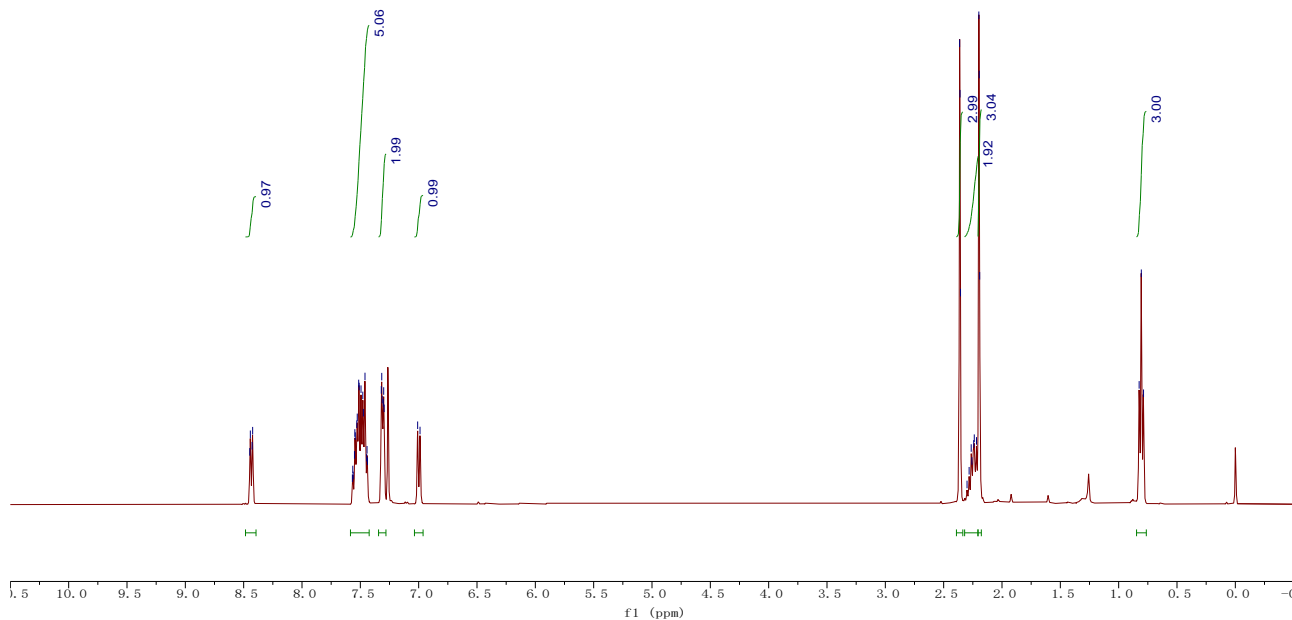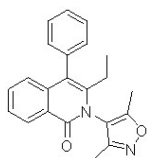

165.566  
162.540  
158.537  
141.905  
138.066  
136.580  
132.864  
130.746  
130.730  
128.947  
128.879  
128.103  
127.848  
126.540  
125.421  
124.123  
118.288  
116.078

77.318  
77.000  
76.682

24.156

13.432  
11.238  
9.774

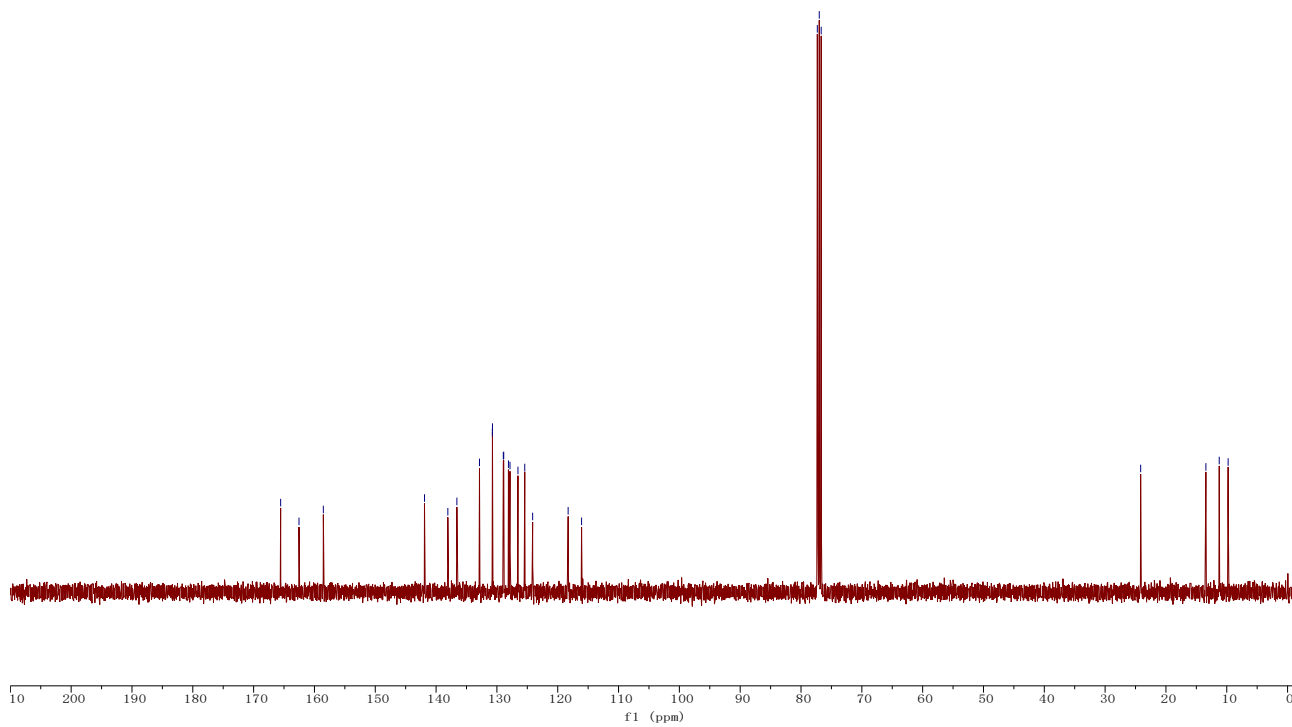

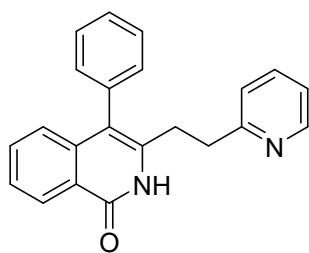

**Compound 4a:** Yield: 56 mg, 85%; A white solid; Mp: > 200 °C; Isolated by column chromatography on silica gel (EtOAc,  $R_f = 0.5$ );  $^1\text{H}$  NMR (400 MHz, Chloroform-*d*)  $\delta$  11.56 (s, 1H), 8.64 (d,  $J = 4.9$  Hz, 1H), 8.45 (dd,  $J = 8.0, 1.5$  Hz, 1H), 7.62 (td,  $J = 7.7, 1.8$  Hz, 1H), 7.54 – 7.38 (m, 5H), 7.25 – 7.17 (m, 3H), 7.13 (d,  $J = 7.8$  Hz, 1H), 7.07 (d,  $J = 8.2$  Hz, 1H), 3.14 (t,  $J = 6.8$  Hz, 2H), 2.91 (t,  $J = 6.7$  Hz, 2H);  $^{13}\text{C}$  NMR (100 MHz, Chloroform-*d*)  $\delta$  163.3, 159.7, 148.6, 138.9, 138.2, 137.2, 136.2, 132.2, 131.1, 128.7, 127.6, 127.3, 125.8, 125.2, 124.7, 123.5, 121.7, 116.8, 36.5, 29.8; IR (neat):  $\nu$  2922, 1667, 1633, 1472, 749, 707, 698  $\text{cm}^{-1}$ ; HRMS (ESI+) Calcd. for  $\text{C}_{22}\text{H}_{19}\text{N}_2\text{O}$   $[\text{M}+\text{H}]^+$ : 327.1492, found: 327.1489.

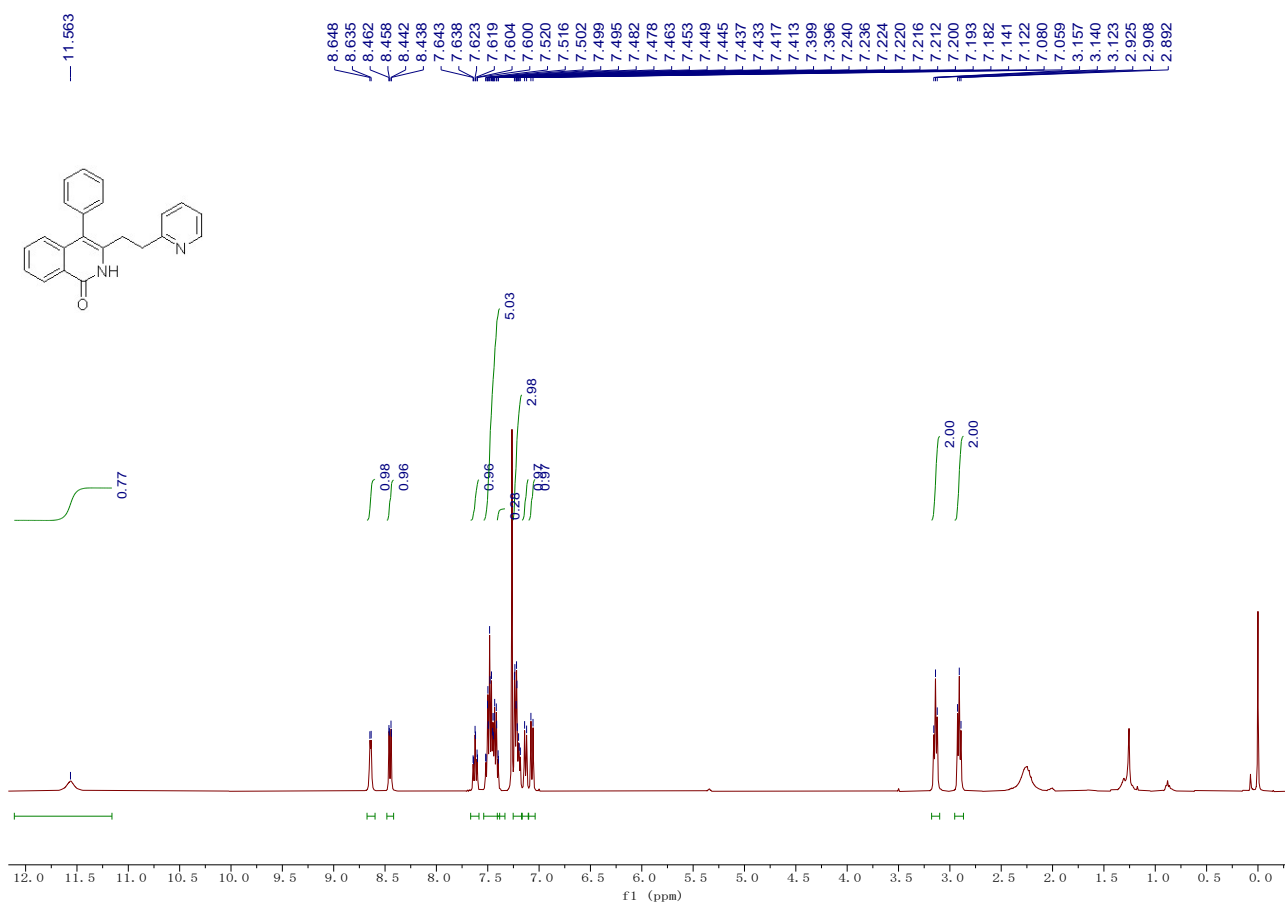

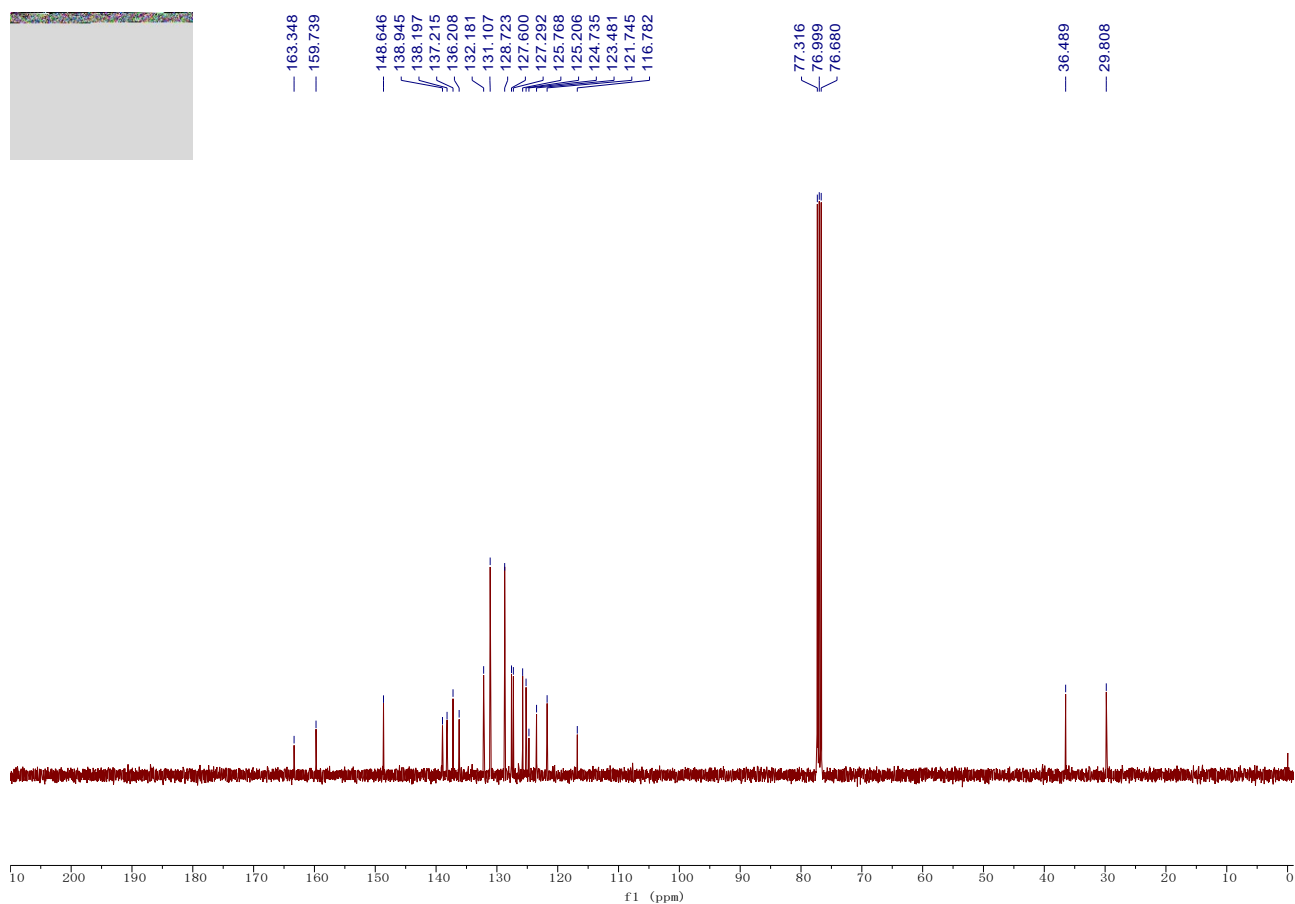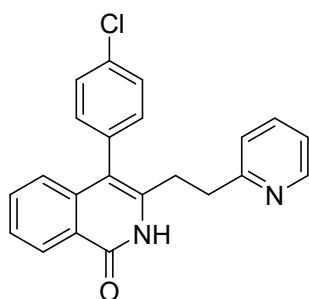

**Compound 4b:** Yield: 25.2 mg, 35%; A white solid; Mp: > 200 °C; Isolated by column chromatography on silica gel (EtOAc,  $R_f = 0.5$ );  $^1\text{H}$  NMR (400 MHz, Chloroform-*d*)  $\delta$  11.94 (s, 1H), 8.61 (d,  $J = 4.9$  Hz, 1H), 8.49 – 8.40 (m, 1H), 7.60 (td,  $J = 7.7, 1.8$  Hz, 1H), 7.56 – 7.48 (m, 1H), 7.48 – 7.37 (m, 3H), 7.22 – 7.09 (m, 4H), 7.03 (d,  $J = 8.1$  Hz, 1H), 3.15 (t,  $J = 6.8$  Hz, 2H), 2.91 (t,  $J = 6.8$  Hz, 2H);  $^{13}\text{C}$  NMR (100 MHz, Chloroform-*d*)  $\delta$  163.5, 159.8, 148.9, 138.7, 138.6, 136.9, 134.7, 133.6, 132.5, 132.3, 129.0, 127.4, 125.9, 124.9, 124.7, 123.4, 121.7, 115.5, 36.6, 29.9; IR (neat):  $\nu$  2899, 1671, 1630, 1474, 771, 742, 742, 742, 735  $\text{cm}^{-1}$ ; HRMS (ESI+) Calcd. for  $\text{C}_{22}\text{H}_{18}\text{N}_2\text{OCl}$   $[\text{M}+\text{H}]^+$ : 361.1102, found: 361.1105.

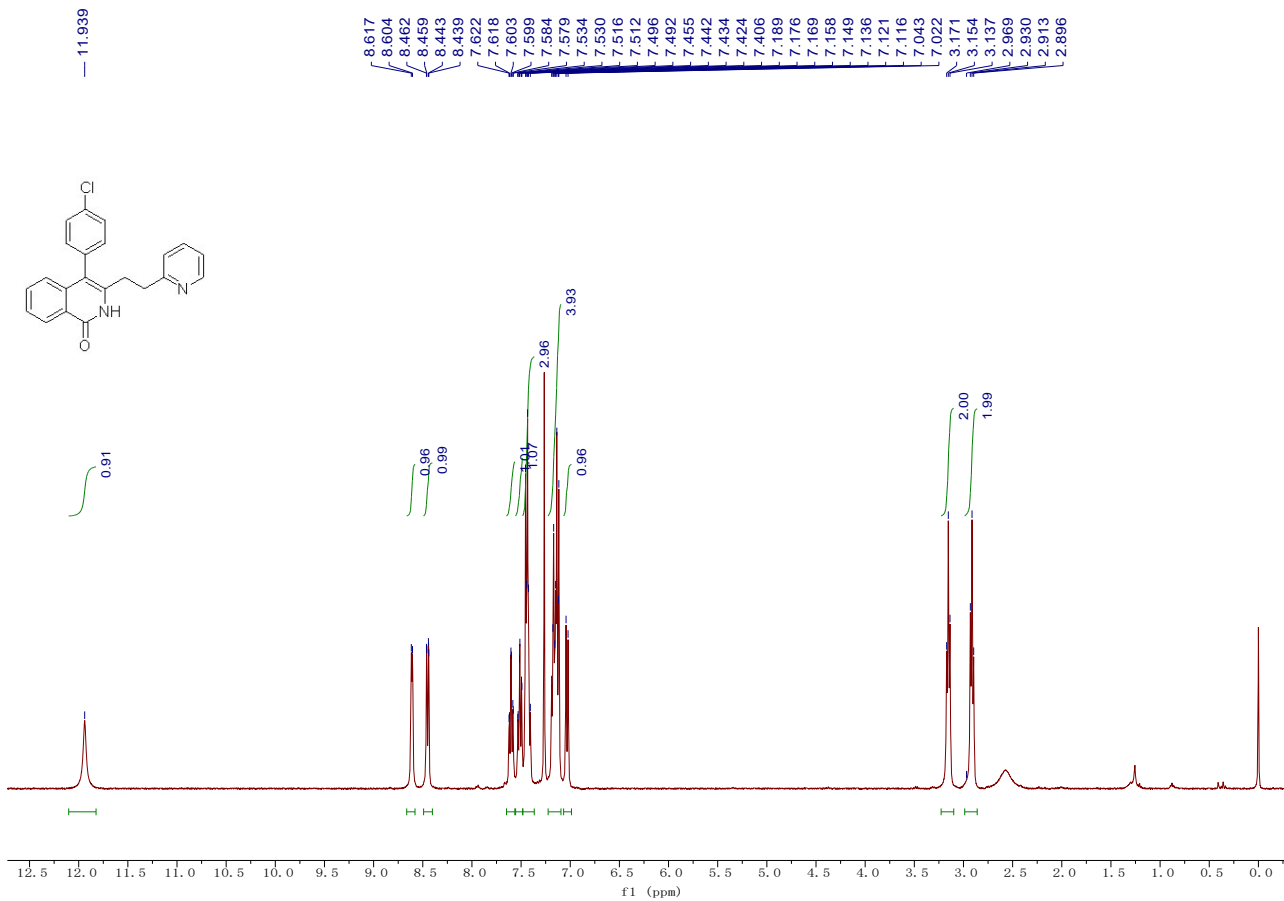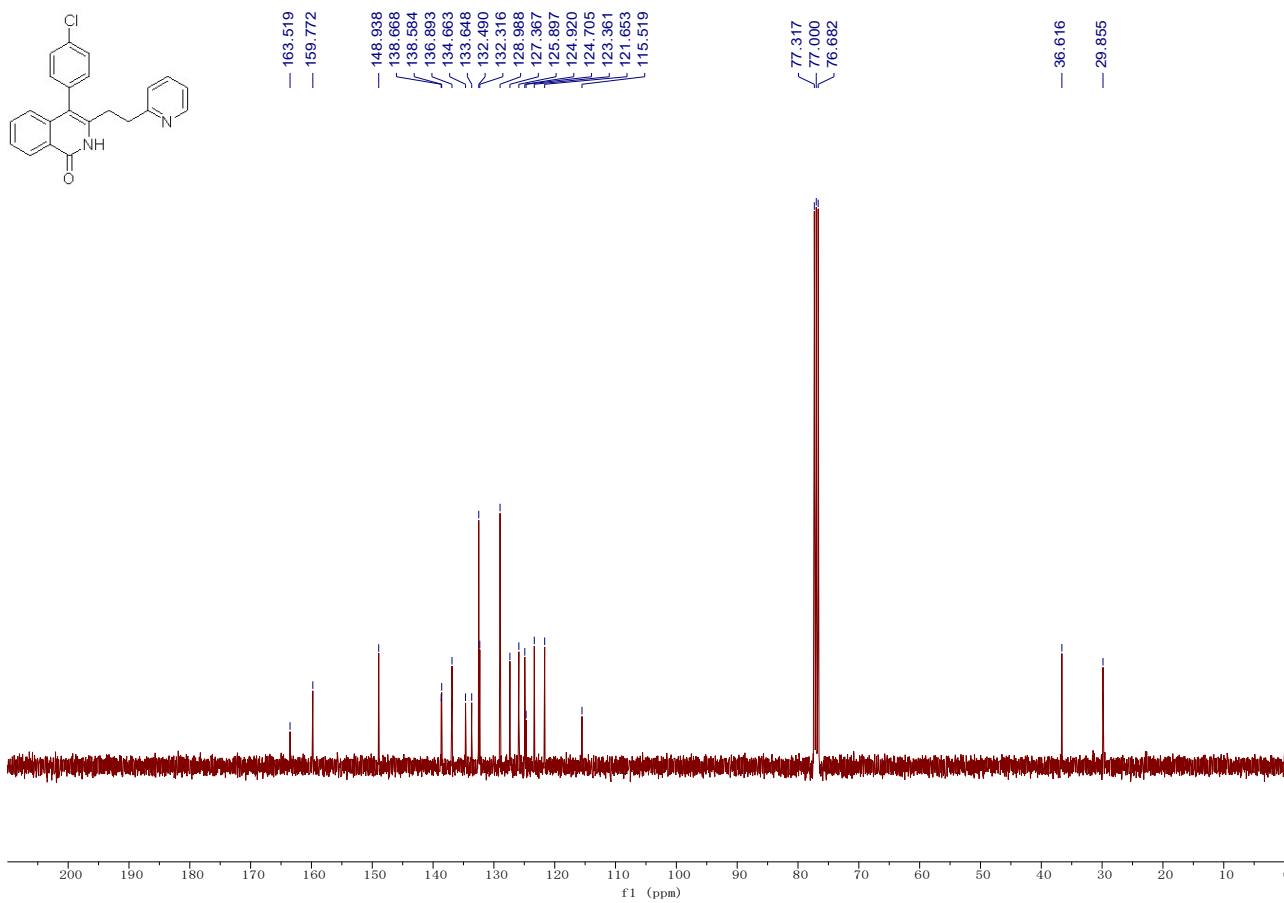

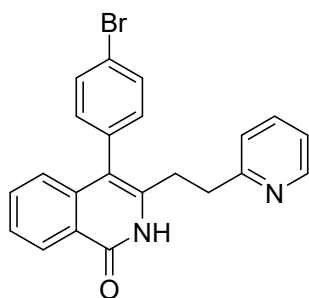

**Compound 4c:** Yield: 37.3 mg, 46%; A white solid; Mp: > 200 °C; Isolated by column chromatography on silica gel (EtOAc,  $R_f = 0.5$ );  $^1\text{H}$  NMR (400 MHz, Chloroform- $d$ )  $\delta$  11.82 (s, 1H), 8.63 (s, 1H), 8.45 (d,  $J = 7.9$  Hz, 1H), 7.68 – 7.57 (m, 3H), 7.55 – 7.48 (m, 1H), 7.42 (t,  $J = 7.5$  Hz, 1H), 7.22 – 7.13 (m, 2H), 7.08 (d,  $J = 8.0$  Hz, 2H), 7.03 (d,  $J = 8.1$  Hz, 1H), 3.15 (t,  $J = 6.8$  Hz, 2H), 2.91 (t,  $J = 6.7$  Hz, 2H);  $^{13}\text{C}$  NMR (100 MHz, Chloroform- $d$ )  $\delta$  163.4, 159.7, 148.9, 138.6, 138.5, 137.0, 135.2, 132.8, 132.3, 132.0, 127.4, 125.9, 124.9, 124.7, 123.4, 121.8, 115.5, 36.6, 29.8; IR (neat):  $\nu$  2955, 2923, 2853, 1657, 1471  $\text{cm}^{-1}$ ; HRMS (ESI+) Calcd. for  $\text{C}_{22}\text{H}_{18}\text{N}_2\text{OBr}$   $[\text{M}+\text{H}]^+$ : 405.0597, found: 405.0605.

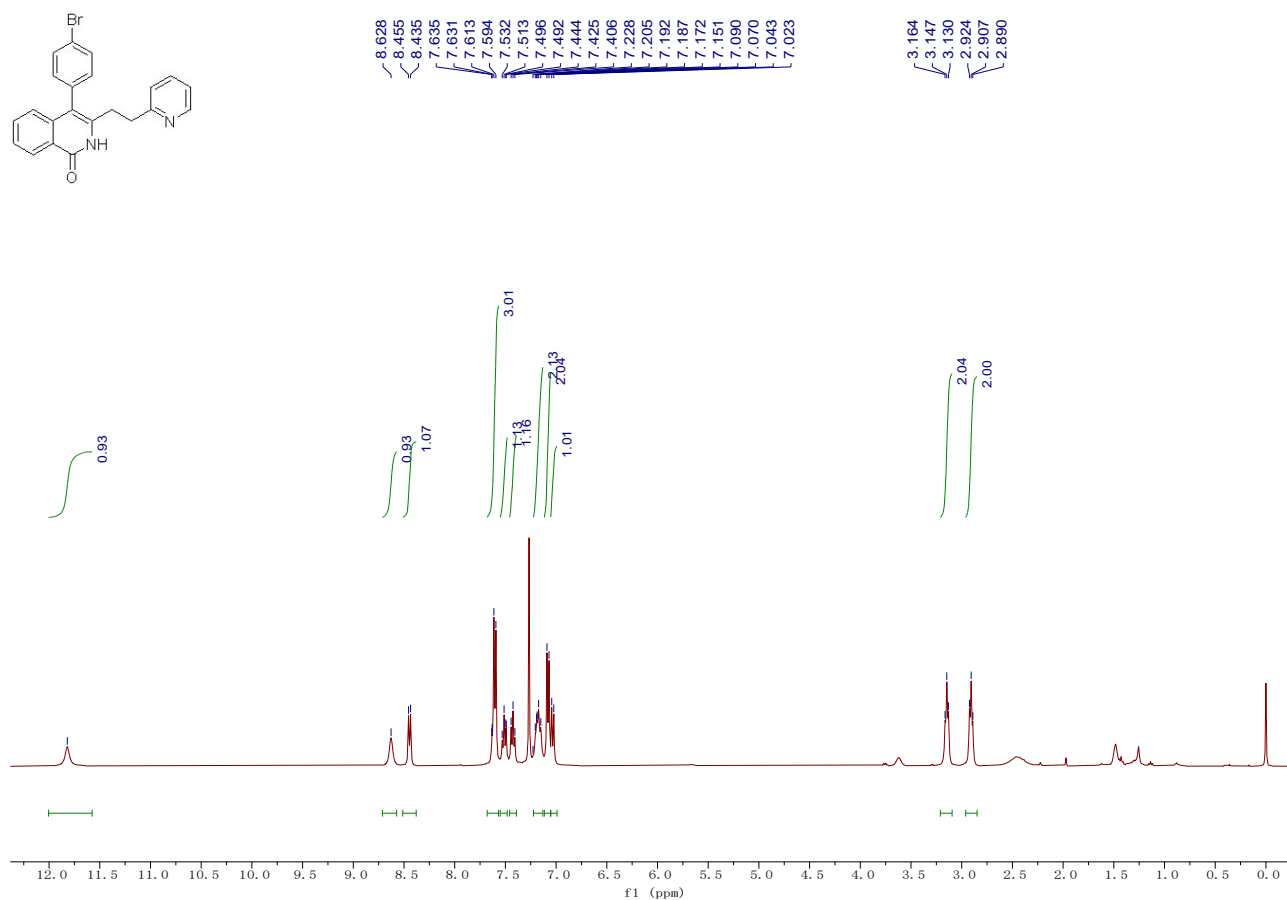

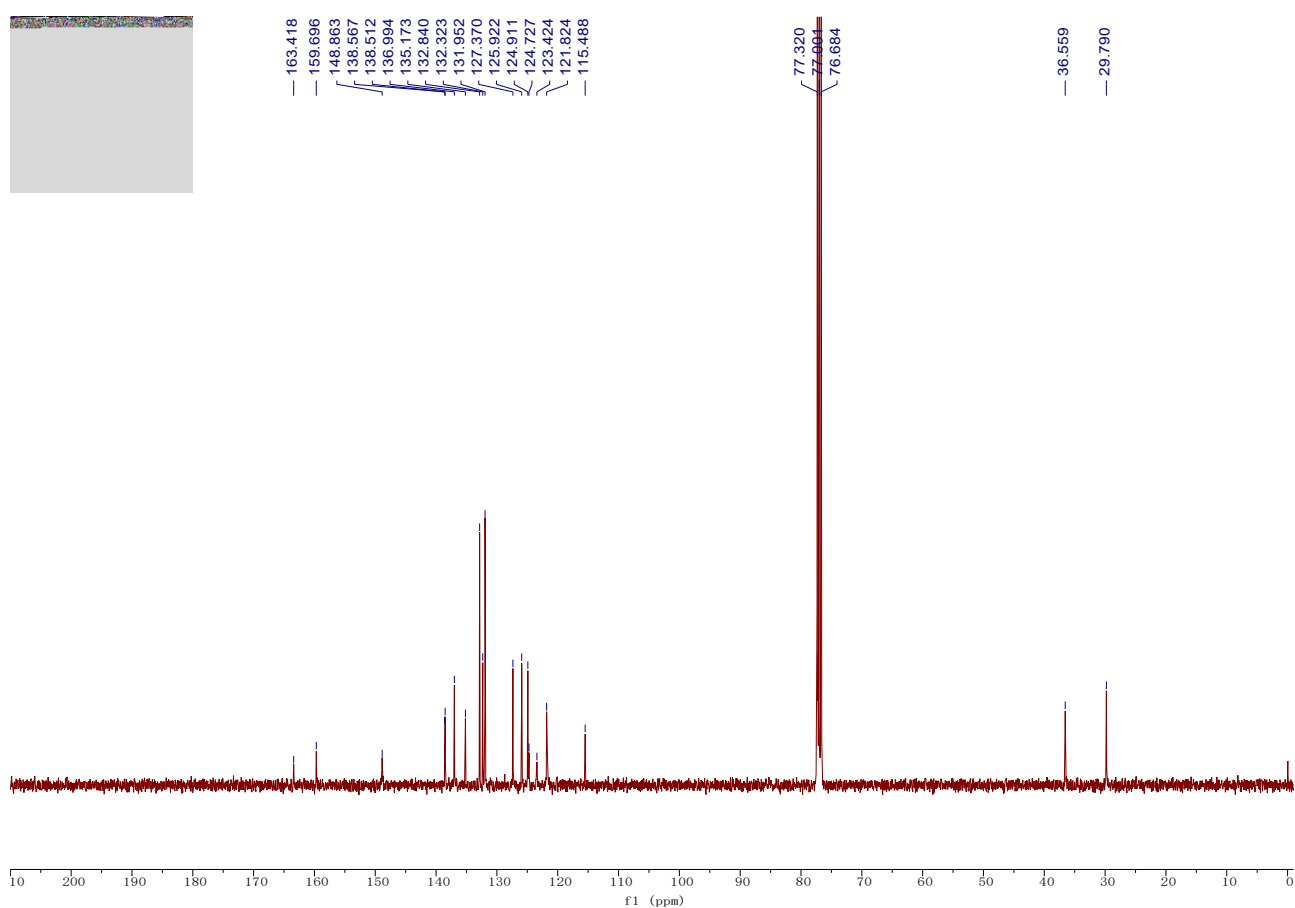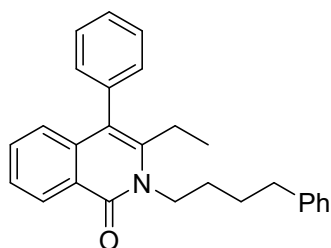

**Compound 7a:** Yield: 53.3 mg, 70%; A white solid; Mp: 103 - 105 °C; Isolated by column chromatography on silica gel (PE/EtOAc = 10:1,  $R_f$  = 0.5);  $^1\text{H}$  NMR (400 MHz, Chloroform-*d*)  $\delta$  8.51 – 8.41 (m, 1H), 7.52 – 7.37 (m, 5H), 7.29 – 7.24 (m, 4H), 7.22 – 7.13 (m, 3H), 6.91 – 6.85 (m, 1H), 4.25 – 4.10 (m, 2H), 2.70 (t,  $J$  = 7.1 Hz, 2H), 2.46 (q,  $J$  = 7.4 Hz, 2H), 1.89 – 1.74 (m, 4H), 1.07 (t,  $J$  = 7.4 Hz, 3H);  $^{13}\text{C}$  NMR (100 MHz, Chloroform-*d*)  $\delta$  162.7, 142.0, 141.6, 137.55, 137.49, 131.8, 131.0, 128.7, 128.4, 128.3, 127.6, 127.5, 125.84, 125.80, 124.9, 124.2, 117.7, 44.2, 35.5, 29.0, 28.9, 23.6, 14.4; IR (neat):  $\nu$  2922, 1636, 1607, 1585, 779, 707  $\text{cm}^{-1}$ ; HRMS (ESI+) Calcd. for  $\text{C}_{27}\text{H}_{28}\text{NO}$   $[\text{M}+\text{H}]^+$ : 382.2165, found: 382.2171.

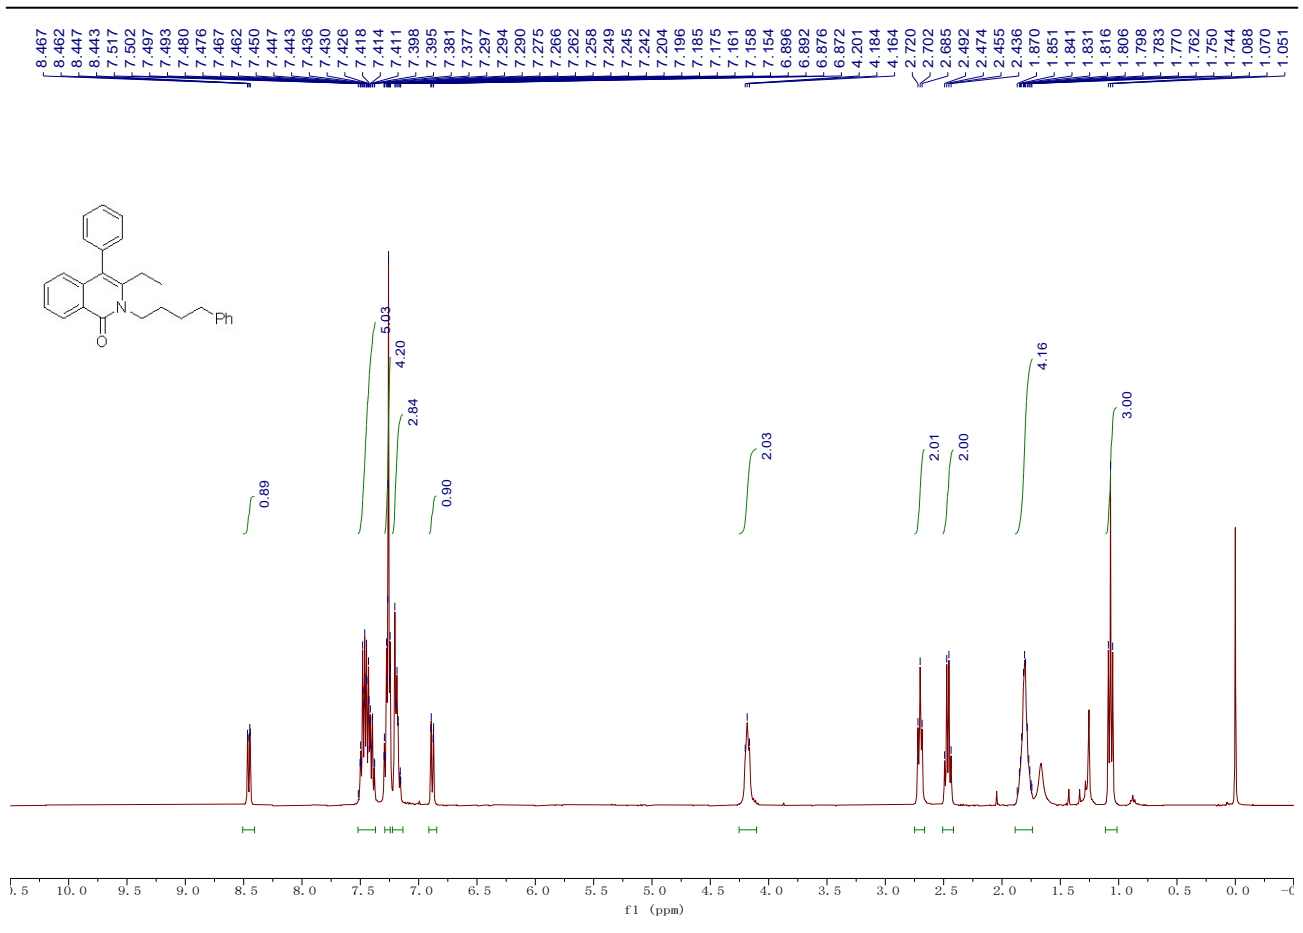



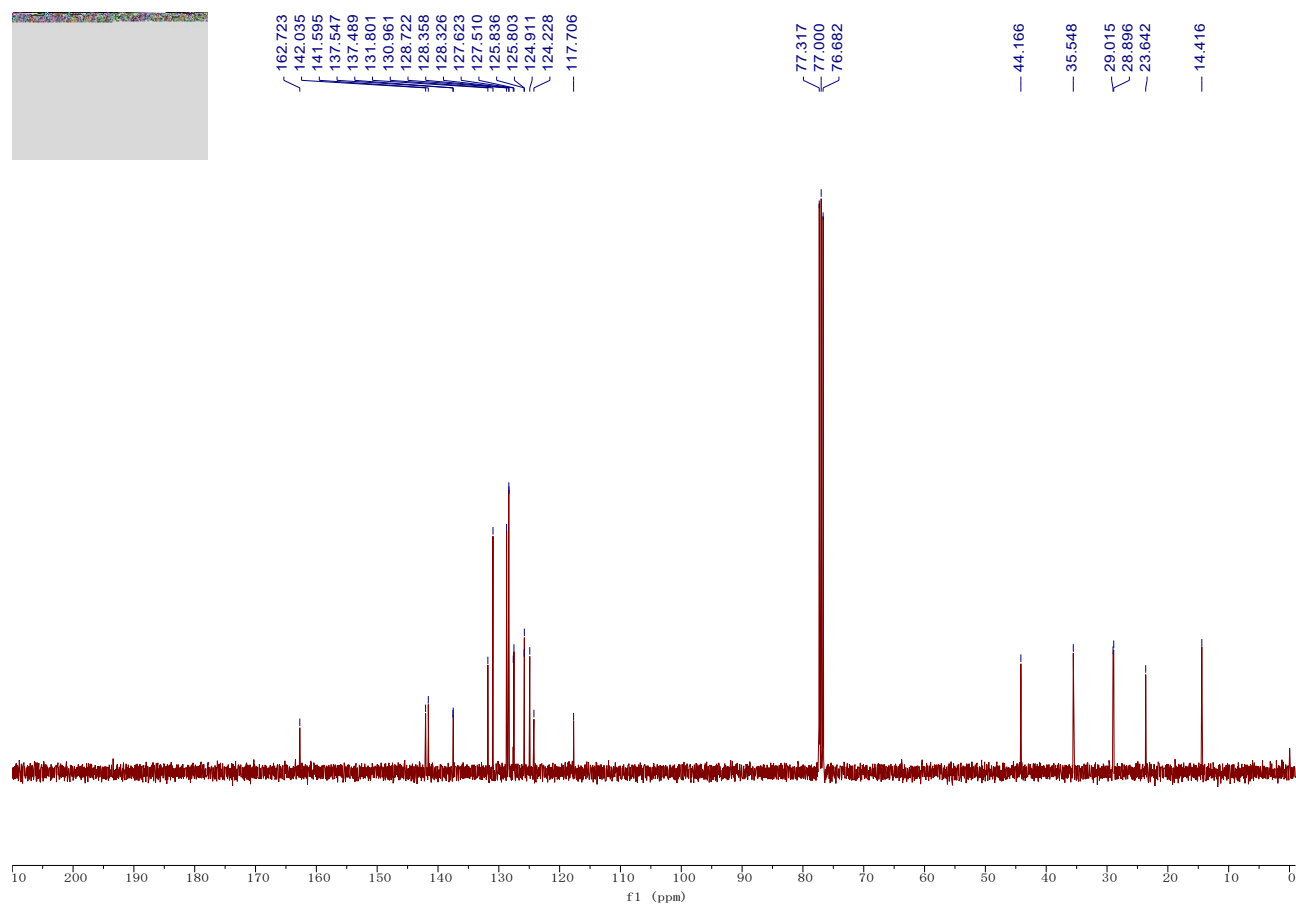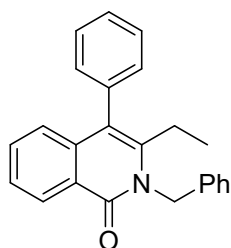

**Compound 7b:** Yield: 57.0 mg, 84%; A white solid; Mp: 183 - 185 °C; Isolated by column chromatography on silica gel (PE/EtOAc = 10:1,  $R_f$  = 0.5);  $^1\text{H}$  NMR (400 MHz, Chloroform-*d*)  $\delta$  8.51 (d,  $J$  = 7.9 Hz, 1H), 7.53 – 7.39 (m, 5H), 7.32 – 7.22 (m, 5H), 7.20 – 7.15 (m, 2H), 6.94 (d,  $J$  = 8.1 Hz, 1H), 5.53 (s, 2H), 2.45 (q,  $J$  = 7.5 Hz, 2H), 1.06 (t,  $J$  = 7.5 Hz, 3H);  $^{13}\text{C}$  NMR (100 MHz, Chloroform-*d*)  $\delta$  163.1, 142.1, 137.7, 137.6, 137.2, 132.1, 131.0, 128.7, 128.1, 127.6, 127.1, 126.1, 126.0, 125.0, 124.2, 118.0, 47.0, 23.9, 14.3; IR (neat):  $\nu$  2953, 1640, 1612, 1590, 1494, 777, 702  $\text{cm}^{-1}$ ; HRMS (ESI+) Calcd. for  $\text{C}_{24}\text{H}_{21}\text{NONa}$  [ $\text{M}+\text{Na}$ ] $^+$ : 362.1515, found: 362.1520.

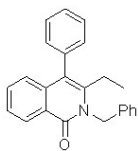

8.516  
8.497  
7.506  
7.488  
7.471  
7.455  
7.441  
7.423  
7.405  
7.326  
7.307  
7.287  
7.268  
7.250  
7.230  
7.212  
7.187  
7.168  
6.954  
6.934  
5.532

2.480  
2.461  
2.442  
2.423

1.077  
1.058  
1.040

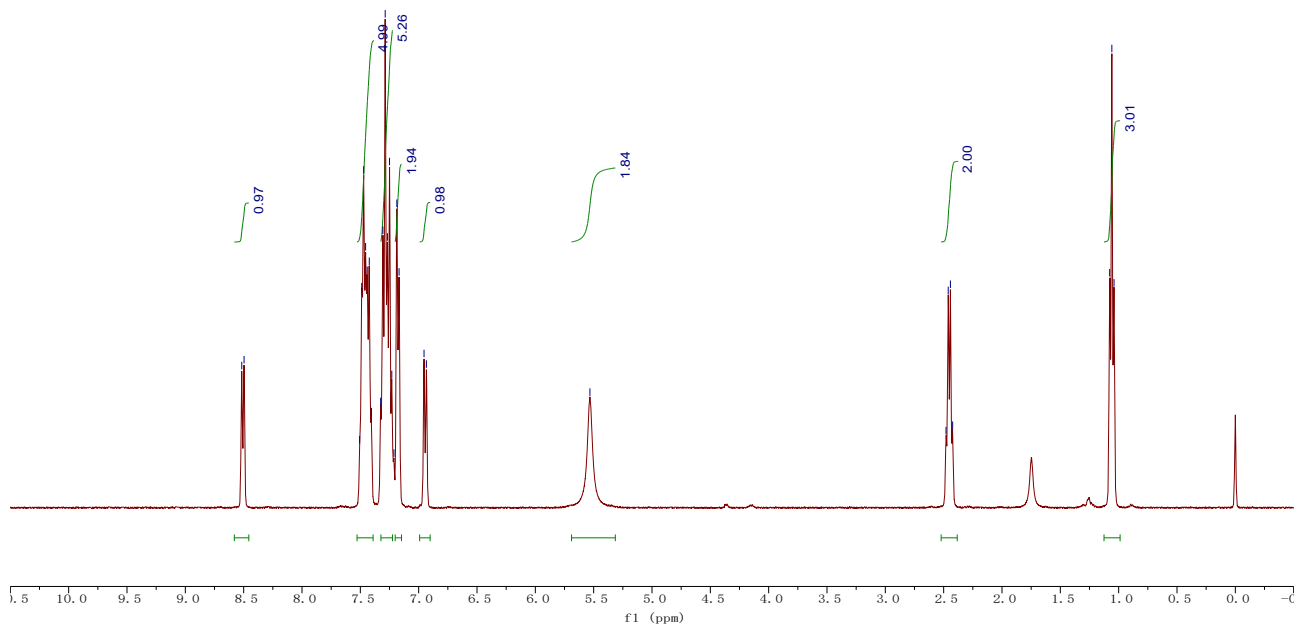

163.127  
142.113  
137.740  
137.603  
137.202  
132.104  
130.953  
128.715  
128.051  
127.583  
127.071  
126.077  
125.983  
125.011  
124.183  
118.045

77.318  
77.000  
76.683

46.983

23.853

14.272

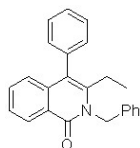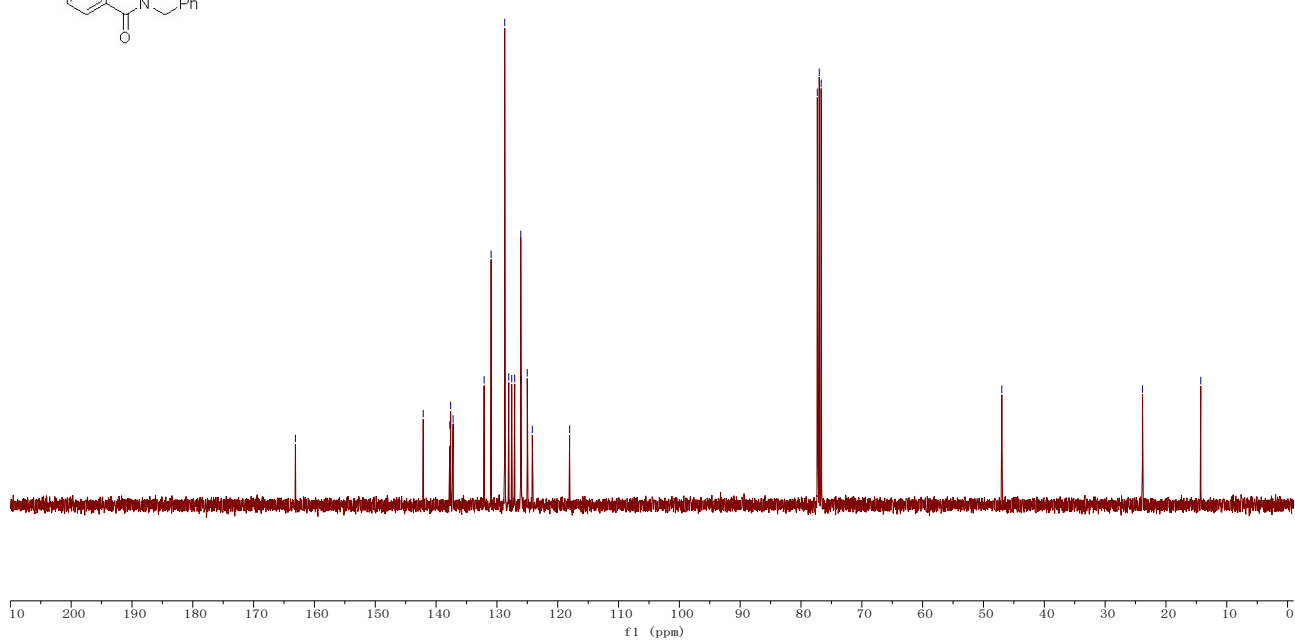

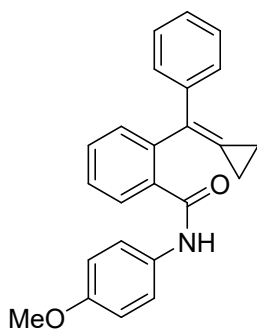

**Compound 5a:** Yield: 56.8 mg, 80%; A white solid; Mp: 140 - 142 °C; Isolated by column chromatography on silica gel (PE/EtOAc = 4:1,  $R_f = 0.5$ );  $^1\text{H}$  NMR (400 MHz, Chloroform-*d*)  $\delta$  7.89 (dd,  $J = 7.5, 1.6$  Hz, 1H), 7.60 – 7.40 (m, 5H), 7.37 – 7.27 (m, 3H), 7.28 – 7.22 (m, 1H), 7.00 (d,  $J = 8.9$  Hz, 2H), 6.73 (d,  $J = 8.9$  Hz, 2H), 3.73 (s, 3H), 1.65 – 1.54 (m, 2H), 1.25 – 1.15 (m, 2H);  $^{13}\text{C}$  NMR (100 MHz, Chloroform-*d*)  $\delta$  166.7, 156.3, 139.4, 138.7, 135.9, 130.9, 130.8, 130.5, 129.5, 128.6, 127.8, 127.4, 126.8, 126.6, 121.6, 113.9, 55.3, 5.8, 2.0; IR (neat):  $\nu$  1636, 1243, 1034, 830, 770, 696  $\text{cm}^{-1}$ ; HRMS (ESI+) Calcd. for  $\text{C}_{24}\text{H}_{21}\text{NO}_2\text{Na}$   $[\text{M}+\text{Na}]^+$ : 378.1465, found: 378.1474.

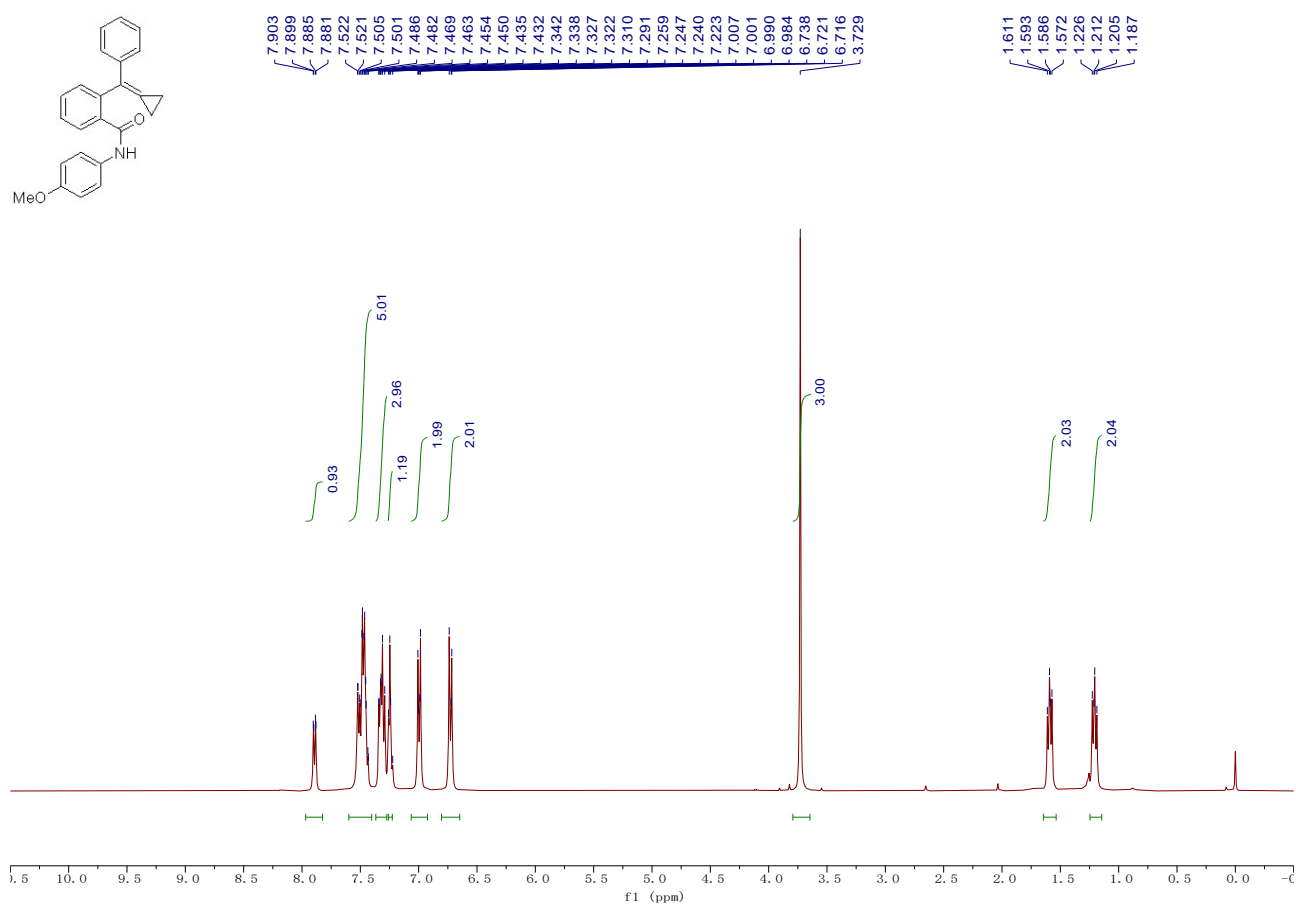

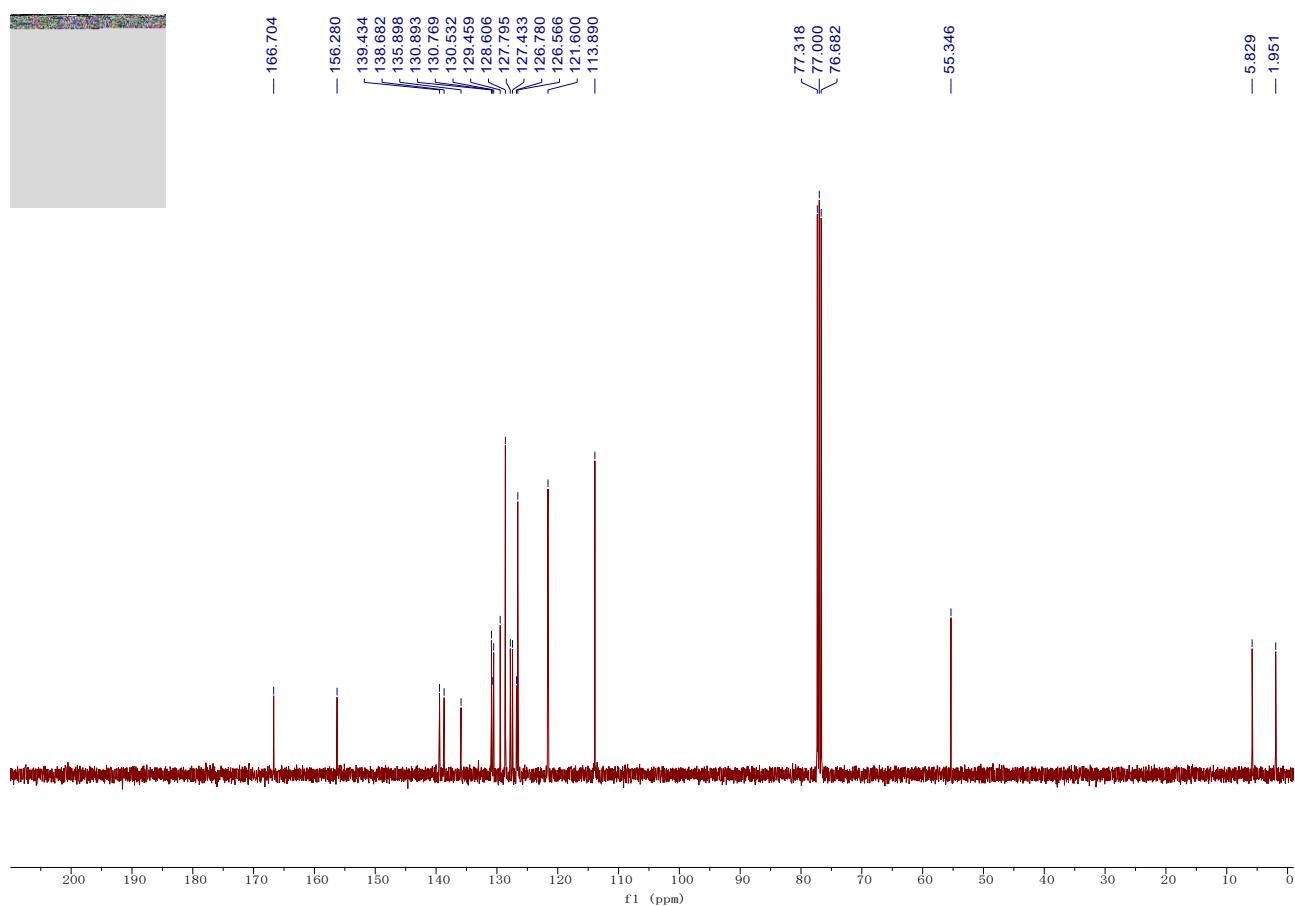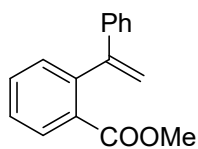

**Compound 8:** Yield: 0.38 g, 80%; A yellow faint oil; this is a known compound and its spectroscopic data are consistent with those reported ones.<sup>3</sup> <sup>1</sup>H NMR (400 MHz, Chloroform-*d*)  $\delta$  7.85 – 7.78 (m, 1H), 7.51 (td,  $J = 7.5, 1.6$  Hz, 1H), 7.44 – 7.35 (m, 2H), 7.31 – 7.20 (m, 5H), 5.67 (d,  $J = 1.3$  Hz, 1H), 5.25 (d,  $J = 1.3$  Hz, 1H), 3.49 (s, 3H).

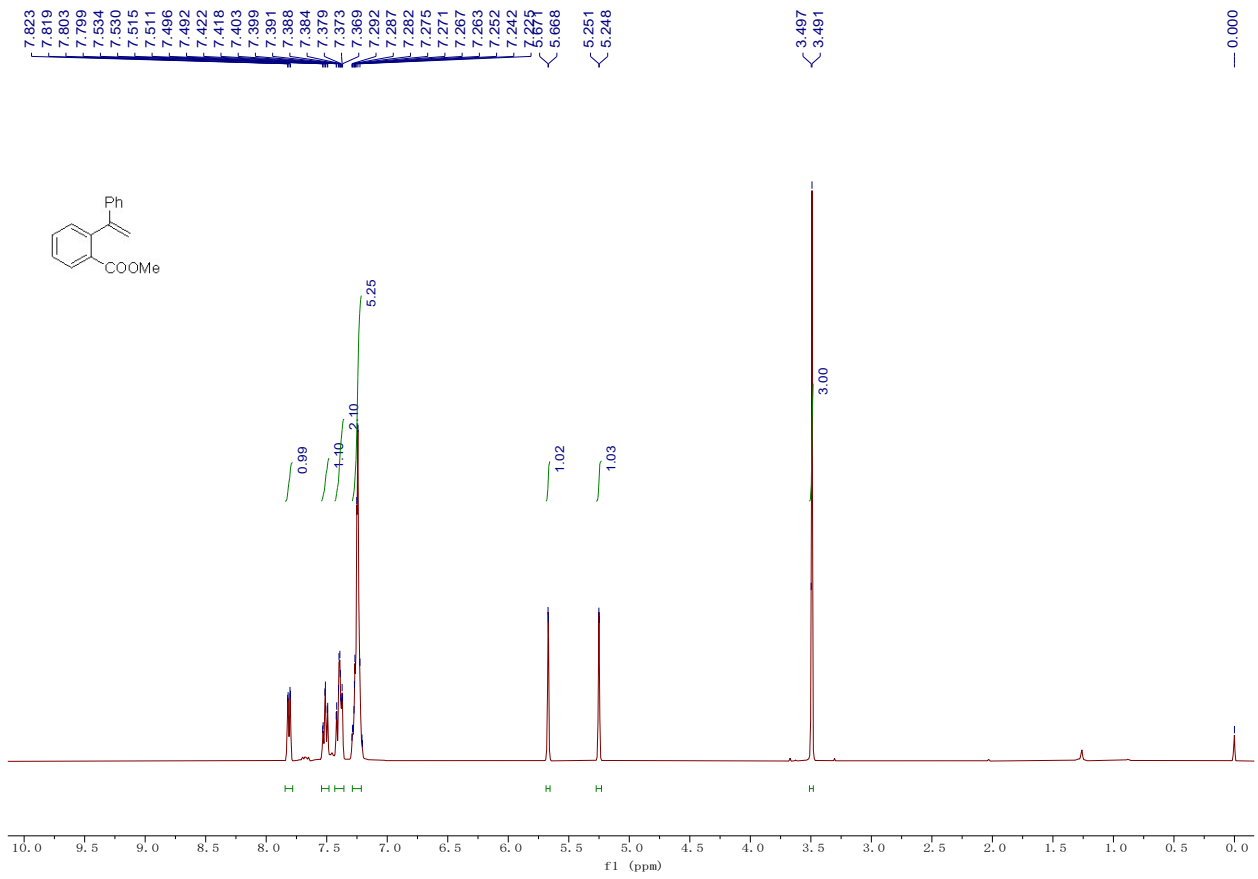

## 6. X-ray data

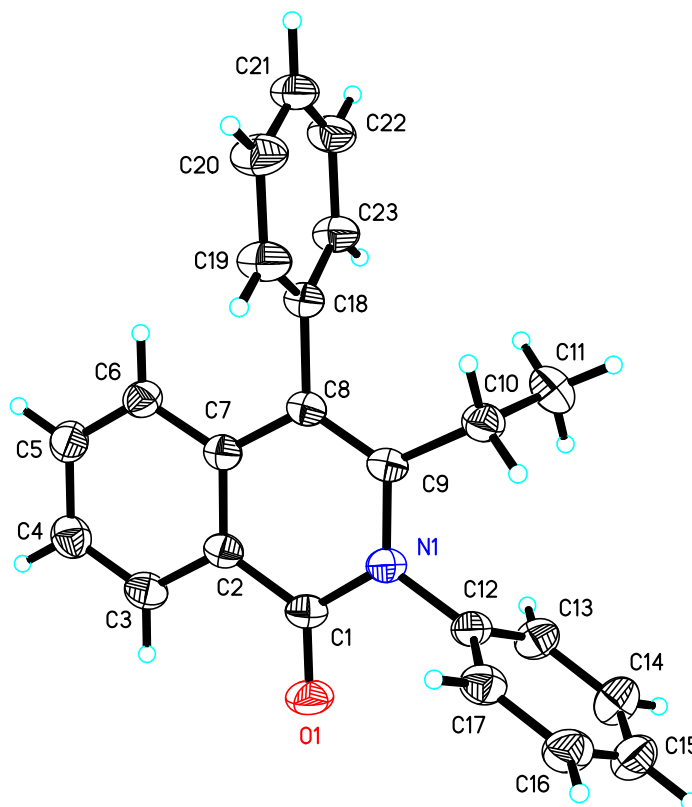

The crystal data of **3o** have been deposited in CCDC with number 2074397. Empirical Formula:  $C_{23}H_{19}NO$ ; Formula Weight: 325.39; Crystal Color, Habit: colorless, Crystal Dimensions: 0.060 x 0.050 x 0.020 mm<sup>3</sup>; Crystal System: Tetragonal; Lattice Parameters:  $a = 21.3009(5)$  Å,  $b = 21.3009(5)$  Å,  $c = 7.7405(3)$  Å,  $\alpha = 90^\circ$ ,  $\beta = 90^\circ$ ,  $\gamma = 90^\circ$ ,  $V = 3512.1(2)$  Å<sup>3</sup>; Space group:  $P-4 21 c$ ;  $Z = 8$ ;  $D_{calc} = 1.231$  g/cm<sup>3</sup>;  $F_{000} = 1376$ ; Final R indices [ $I > 2\sigma(I)$ ]  $R1 = 0.0326$ ,  $wR2 = 0.0797$ .

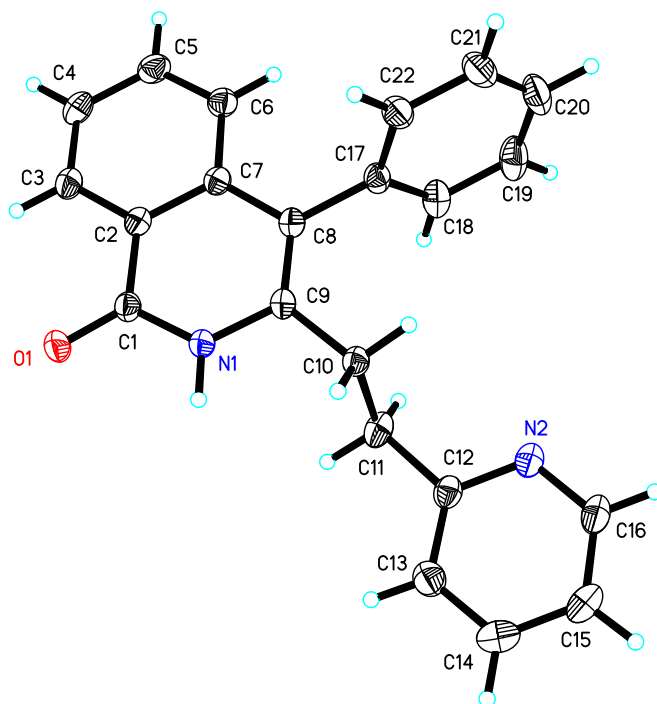

The crystal data of **4a** have been deposited in CCDC with number 2091583. Empirical Formula:  $C_{22}H_{18}N_2O$ ; Formula Weight: 326.38; Crystal Color, Habit: colorless, Crystal Dimensions: 0.190 x 0.150 x 0.120 mm<sup>3</sup>; Crystal System: Triclinic; Lattice Parameters:  $a = 5.5414(5)$  Å,  $b = 9.7020(10)$  Å,  $c = 16.4455(17)$  Å,  $\alpha = 98.437(3)^\circ$ ,  $\beta = 98.614(3)^\circ$ ,  $\gamma = 97.851(3)^\circ$ ,  $V = 853.28(15)$  Å<sup>3</sup>; Space group: P -1;  $Z = 2$ ;  $D_{calc} = 1.270$  g/cm<sup>3</sup>;  $F_{000} = 344$ ; Final R indices [ $I > 2\sigma(I)$ ]  $R_1 = 0.0410$ ,  $wR_2 = 0.0978$ .
